# Supplementary material for: Gene activity in primary T cells infected with HIV89.6: intron retention and induction of genomic repeats
Source: Springer Nature journal article supplement (doi:10.1186/s12977-015-0205-1), 2015-09-17

A.1

## chrX:100648841-100650322

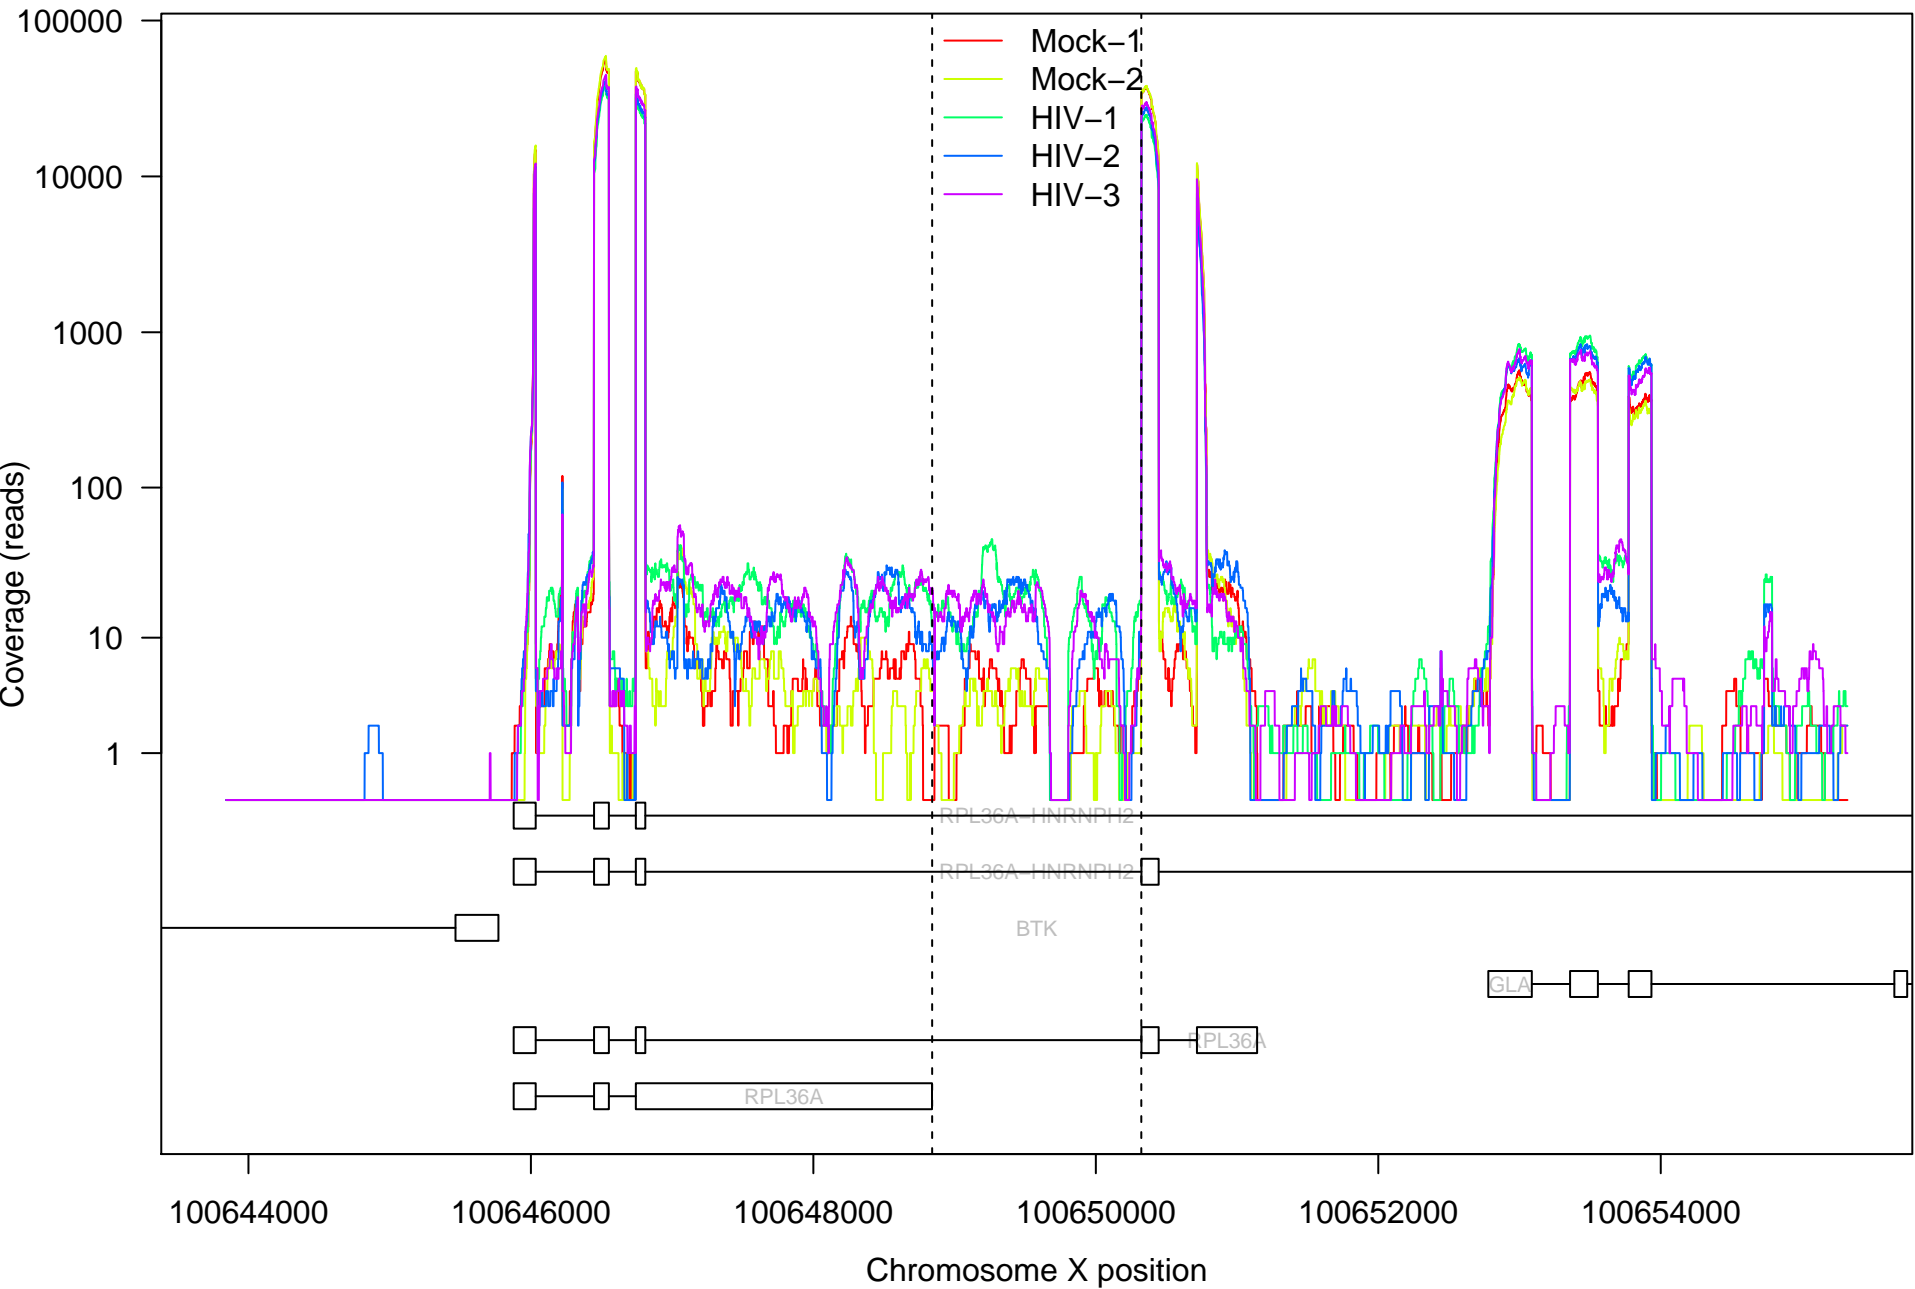

A.2

## chr17:8283255-8285460

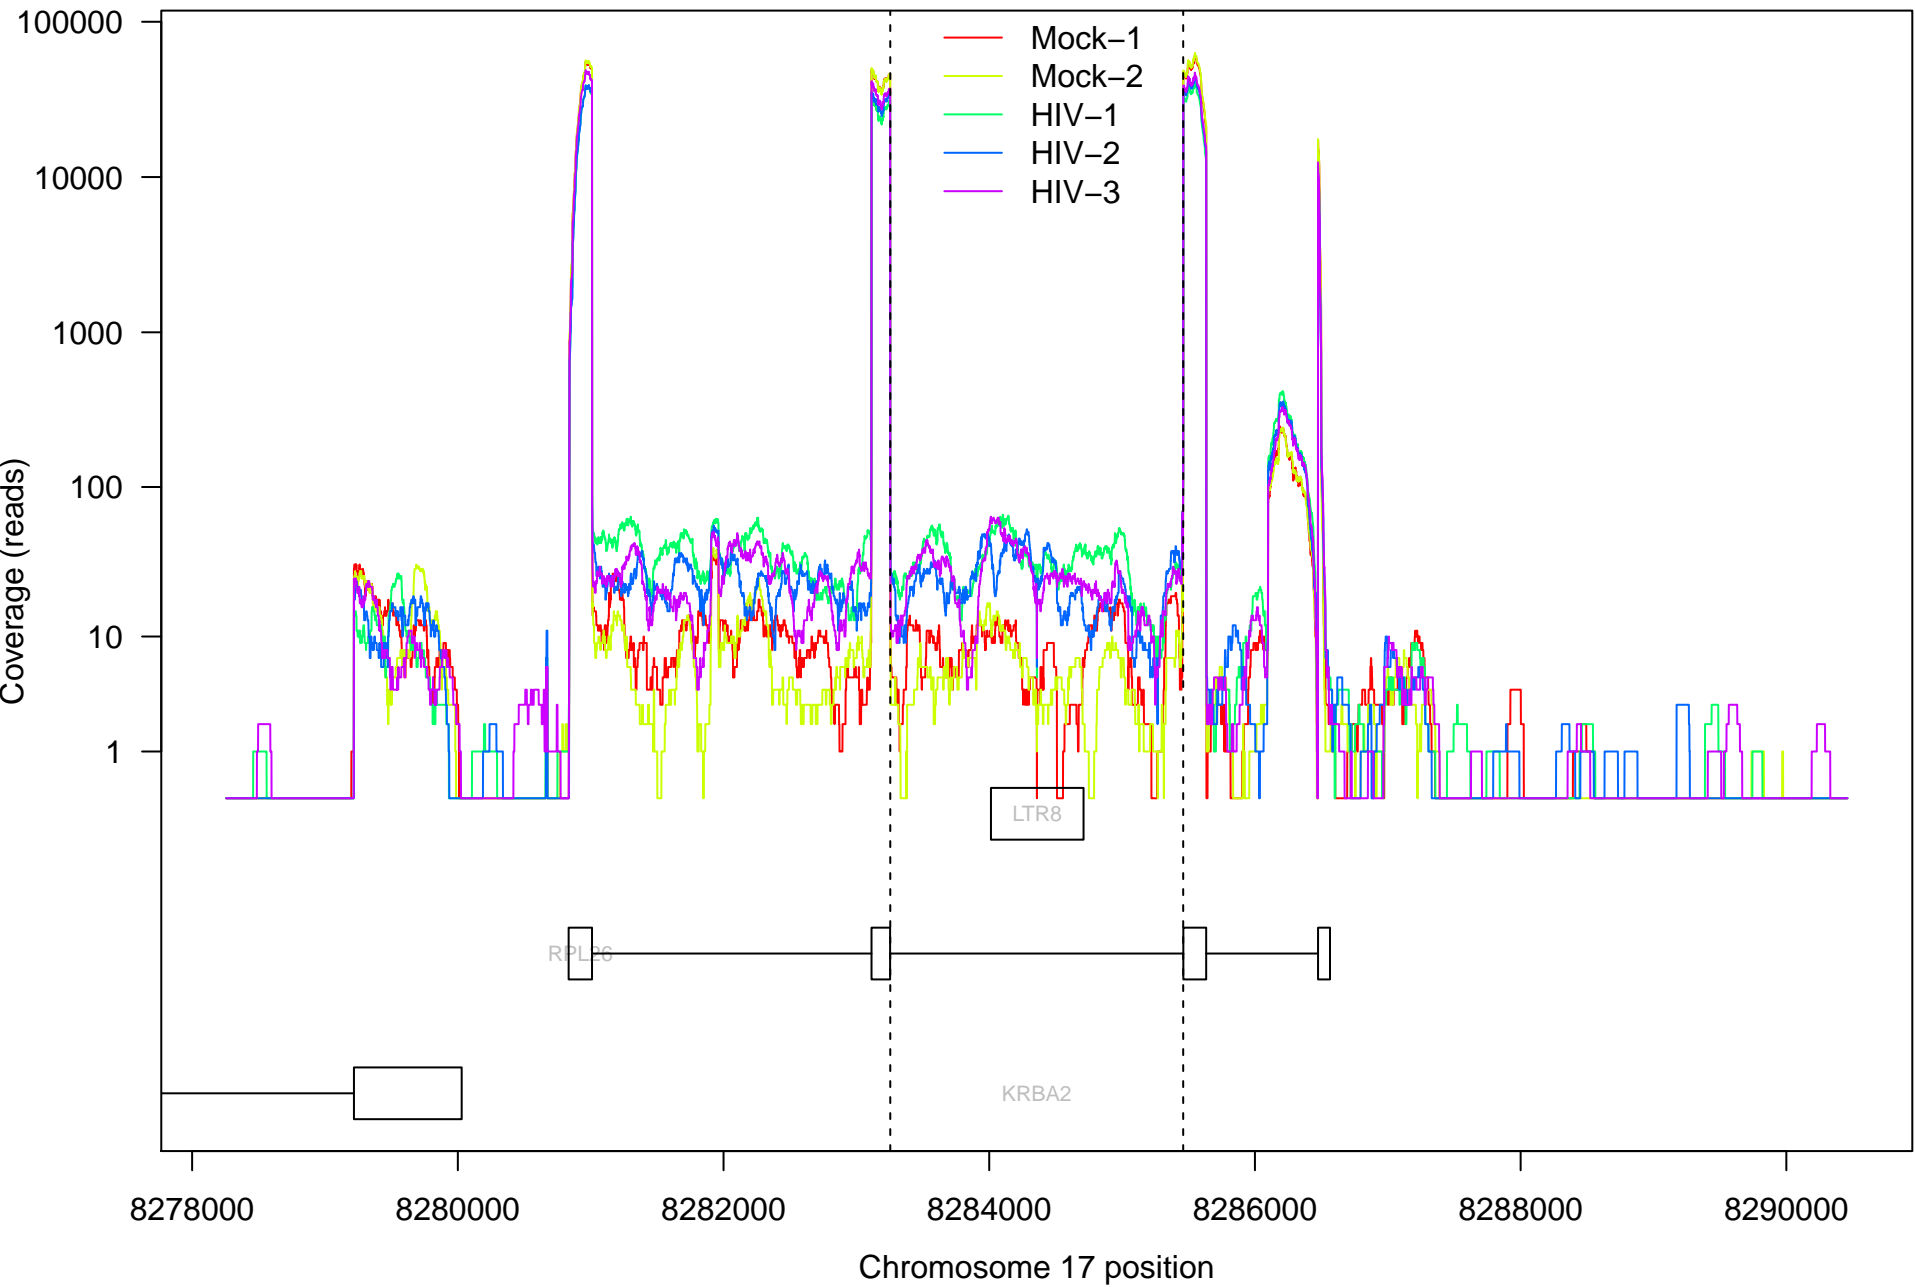

A.3

chr19:54705478-54710143

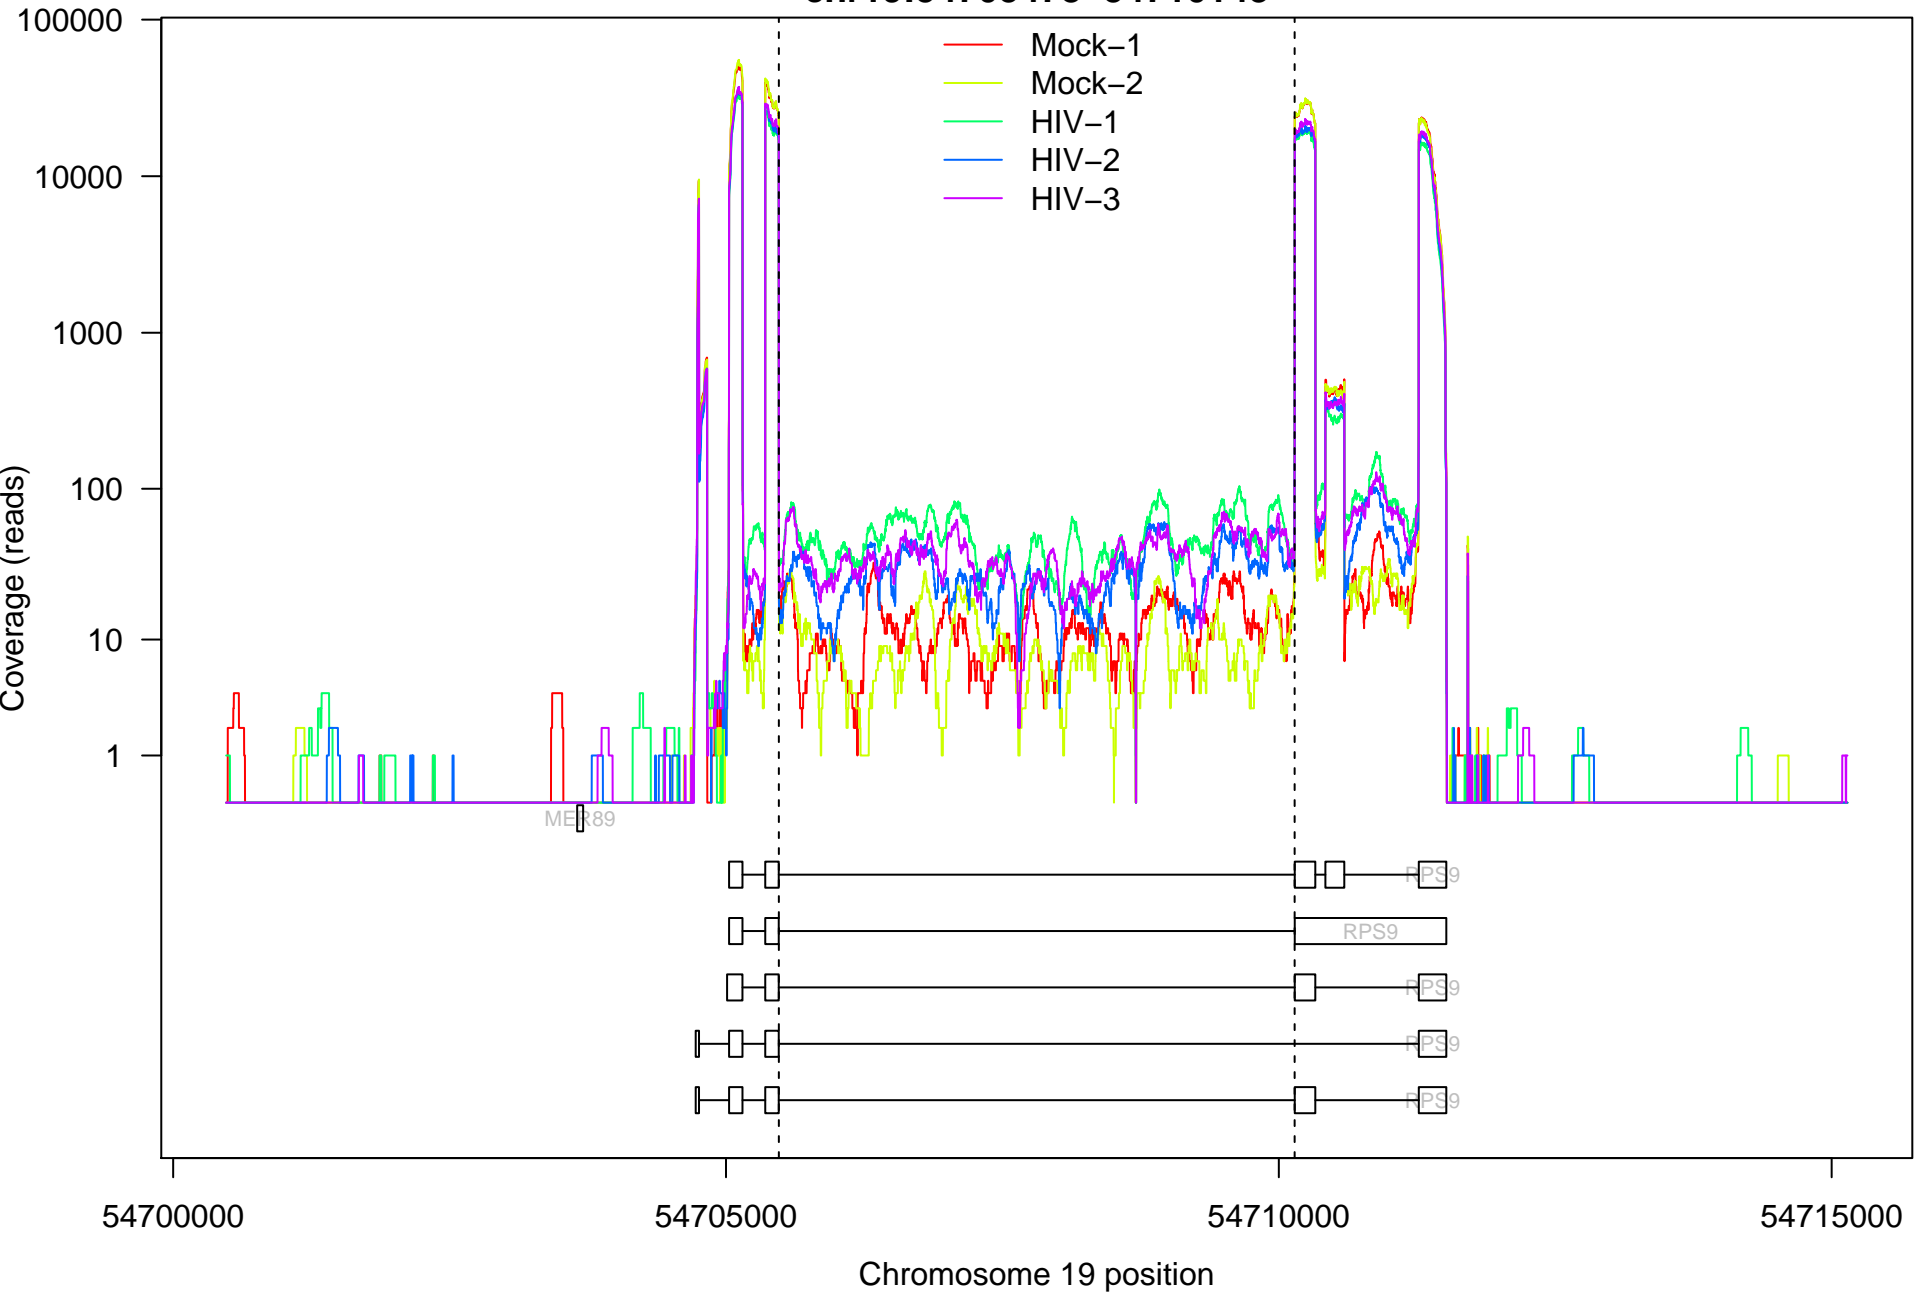

A.4

chr9:19376650-19378358

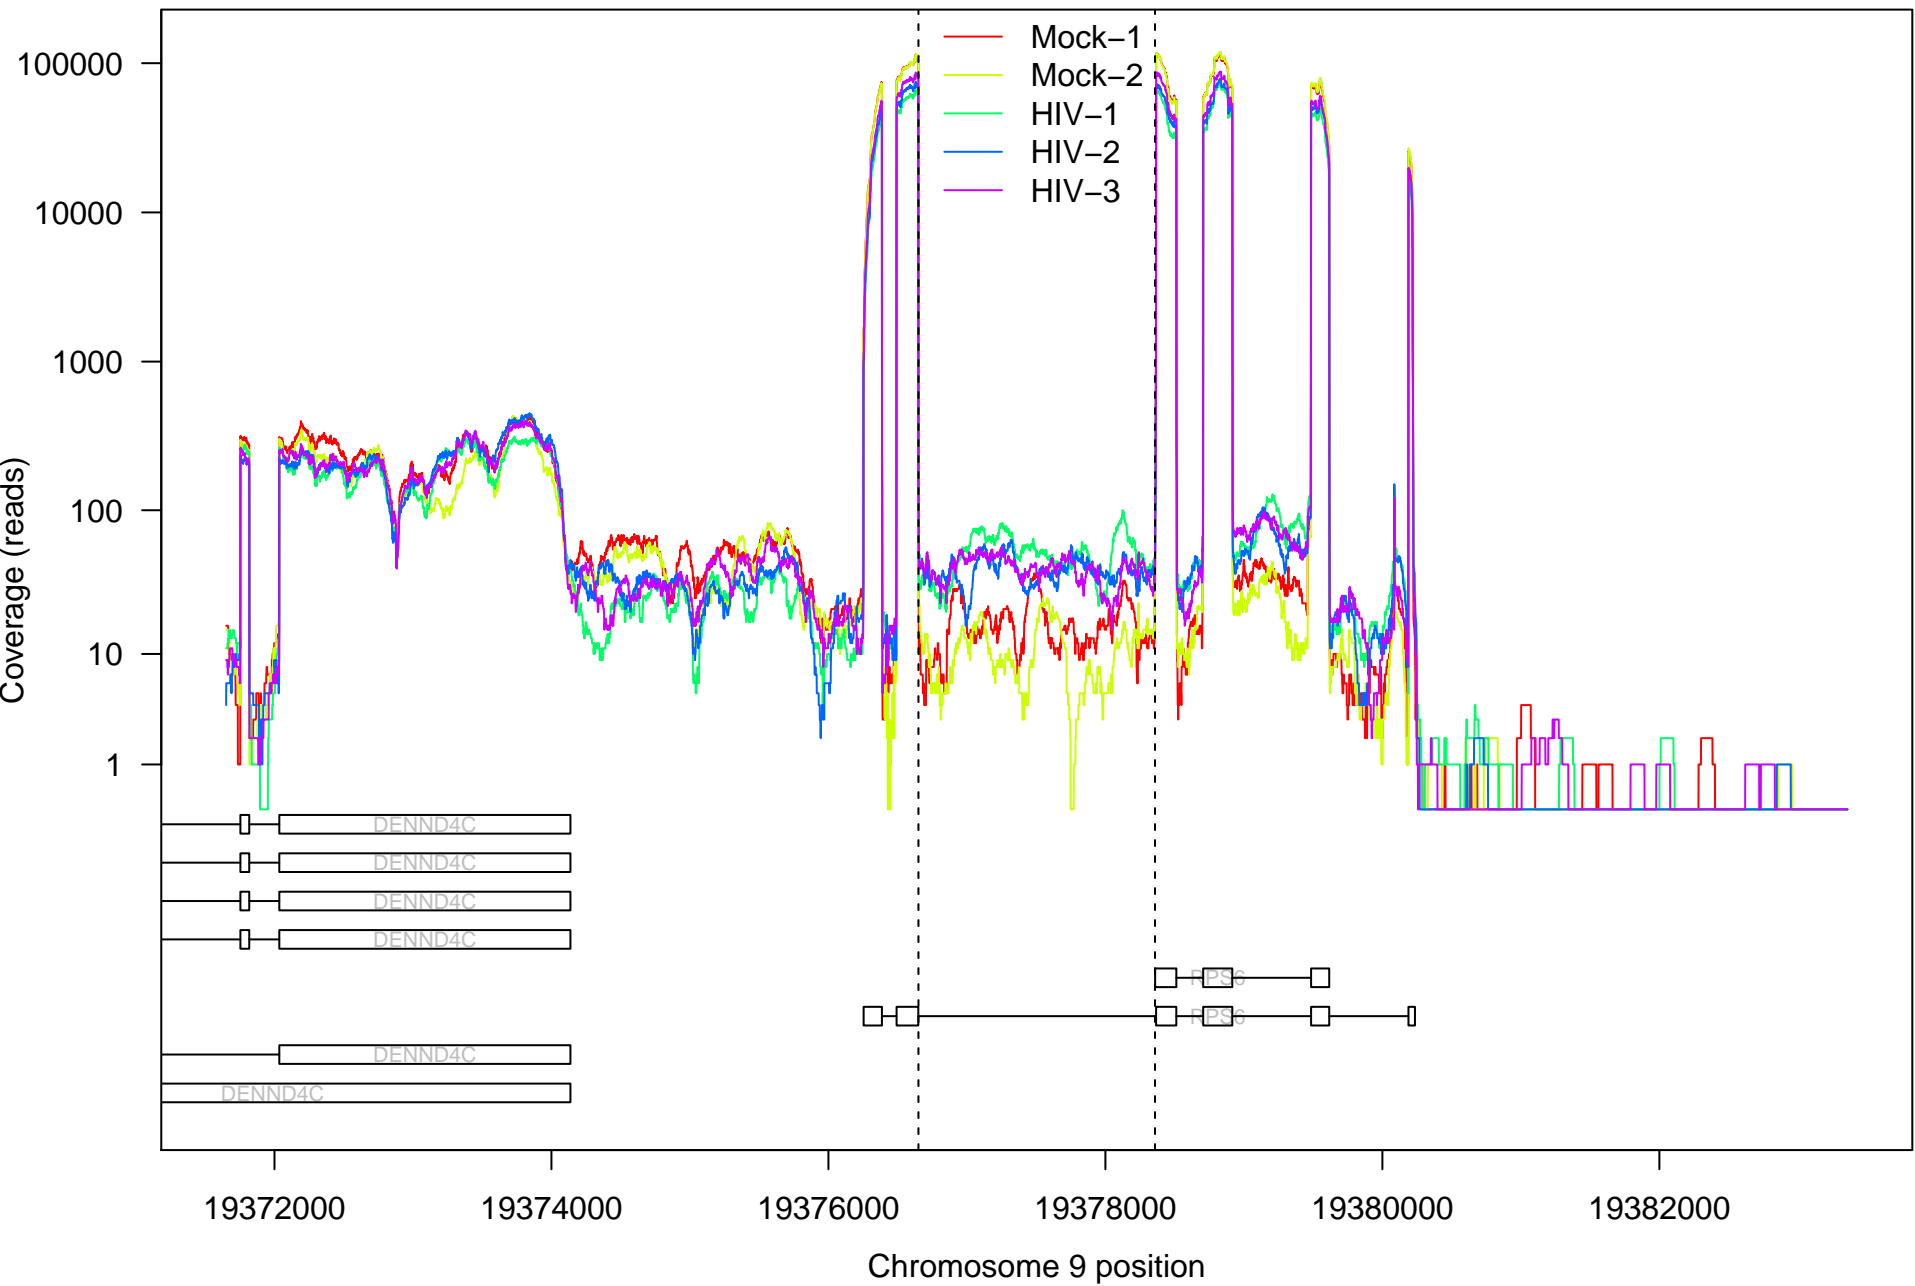

A.5

## chrX:153628283–153628621

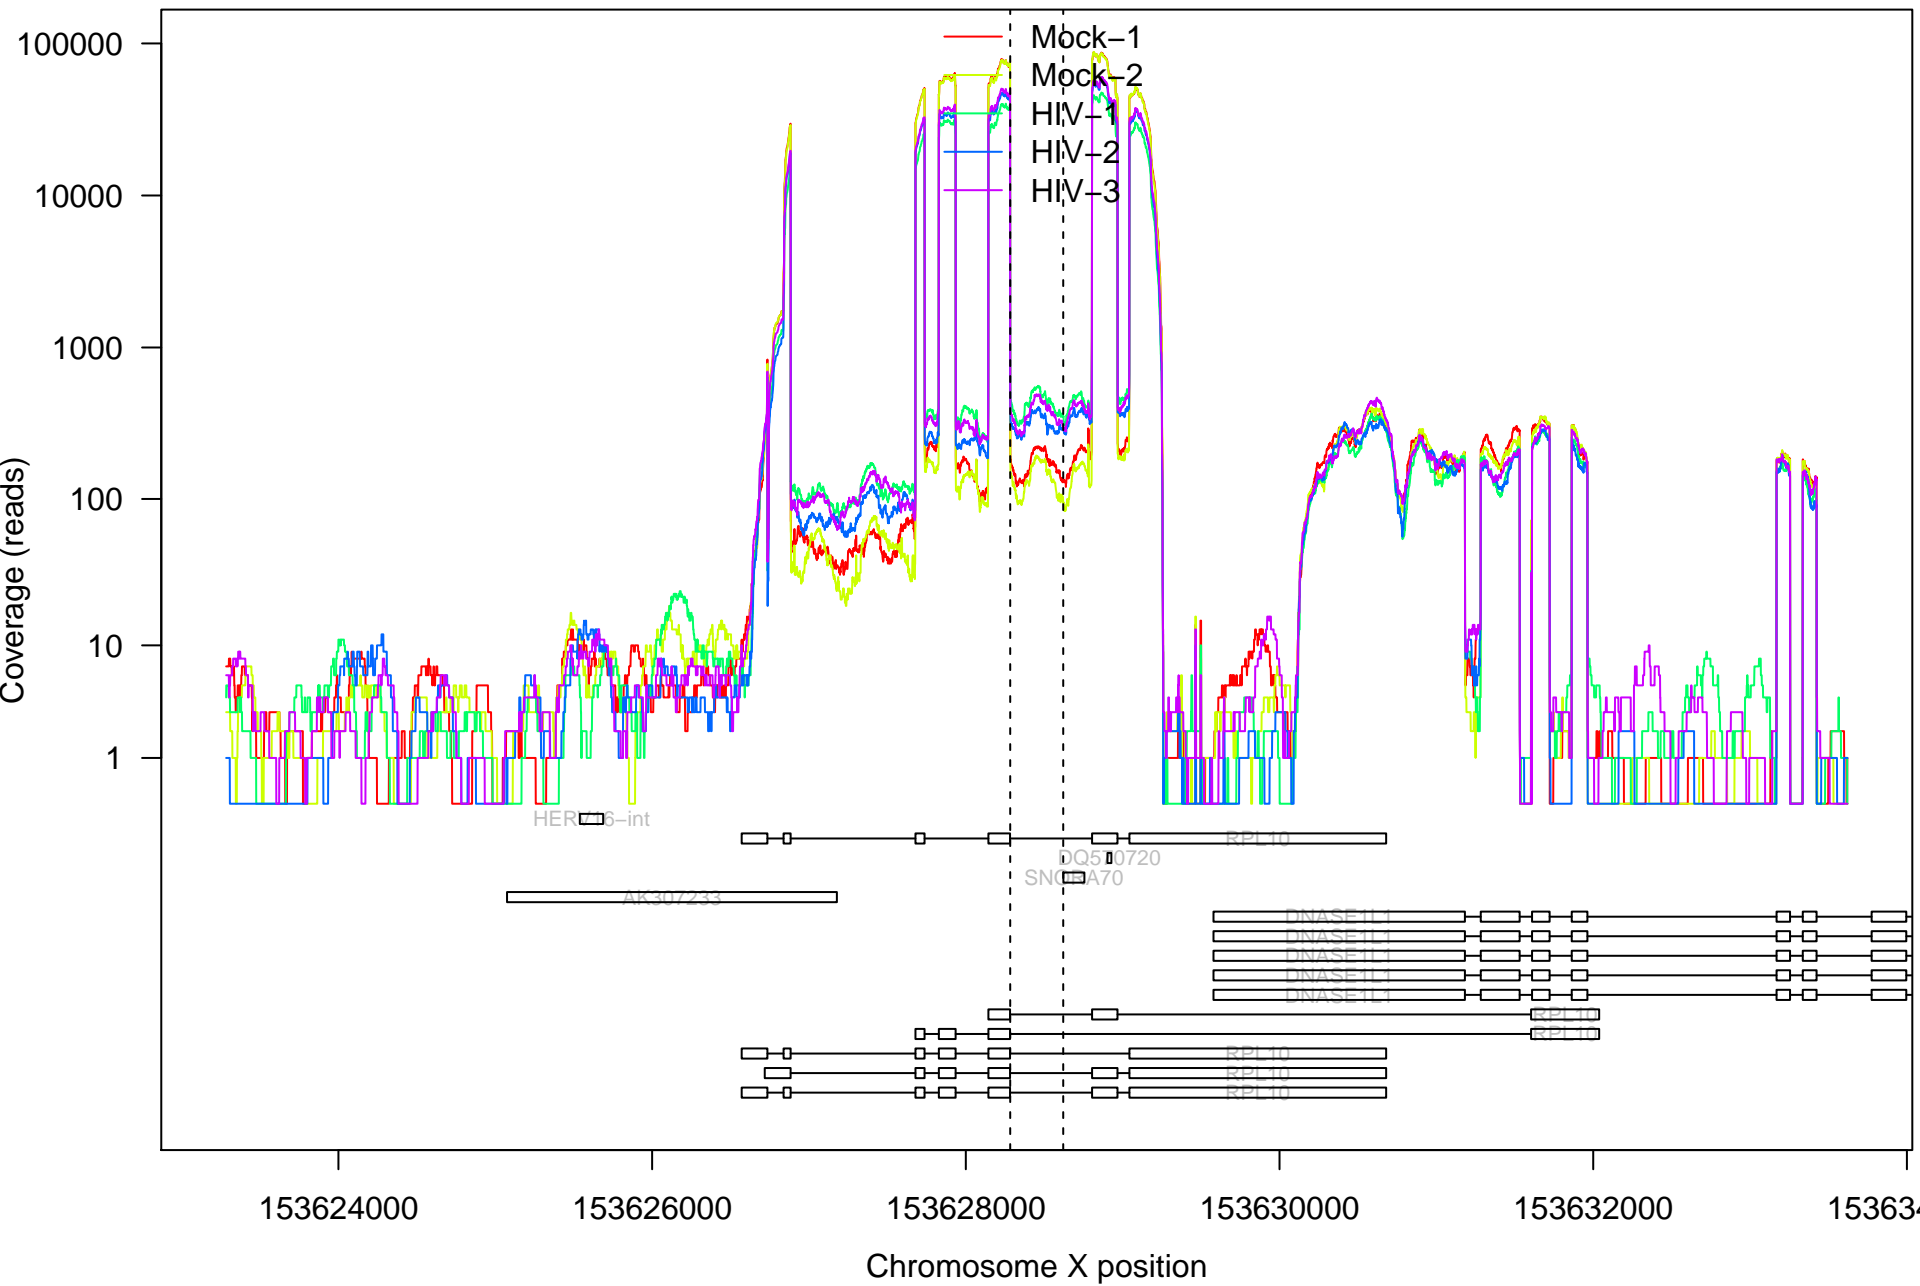

A.6

chr1:24021282-24022287

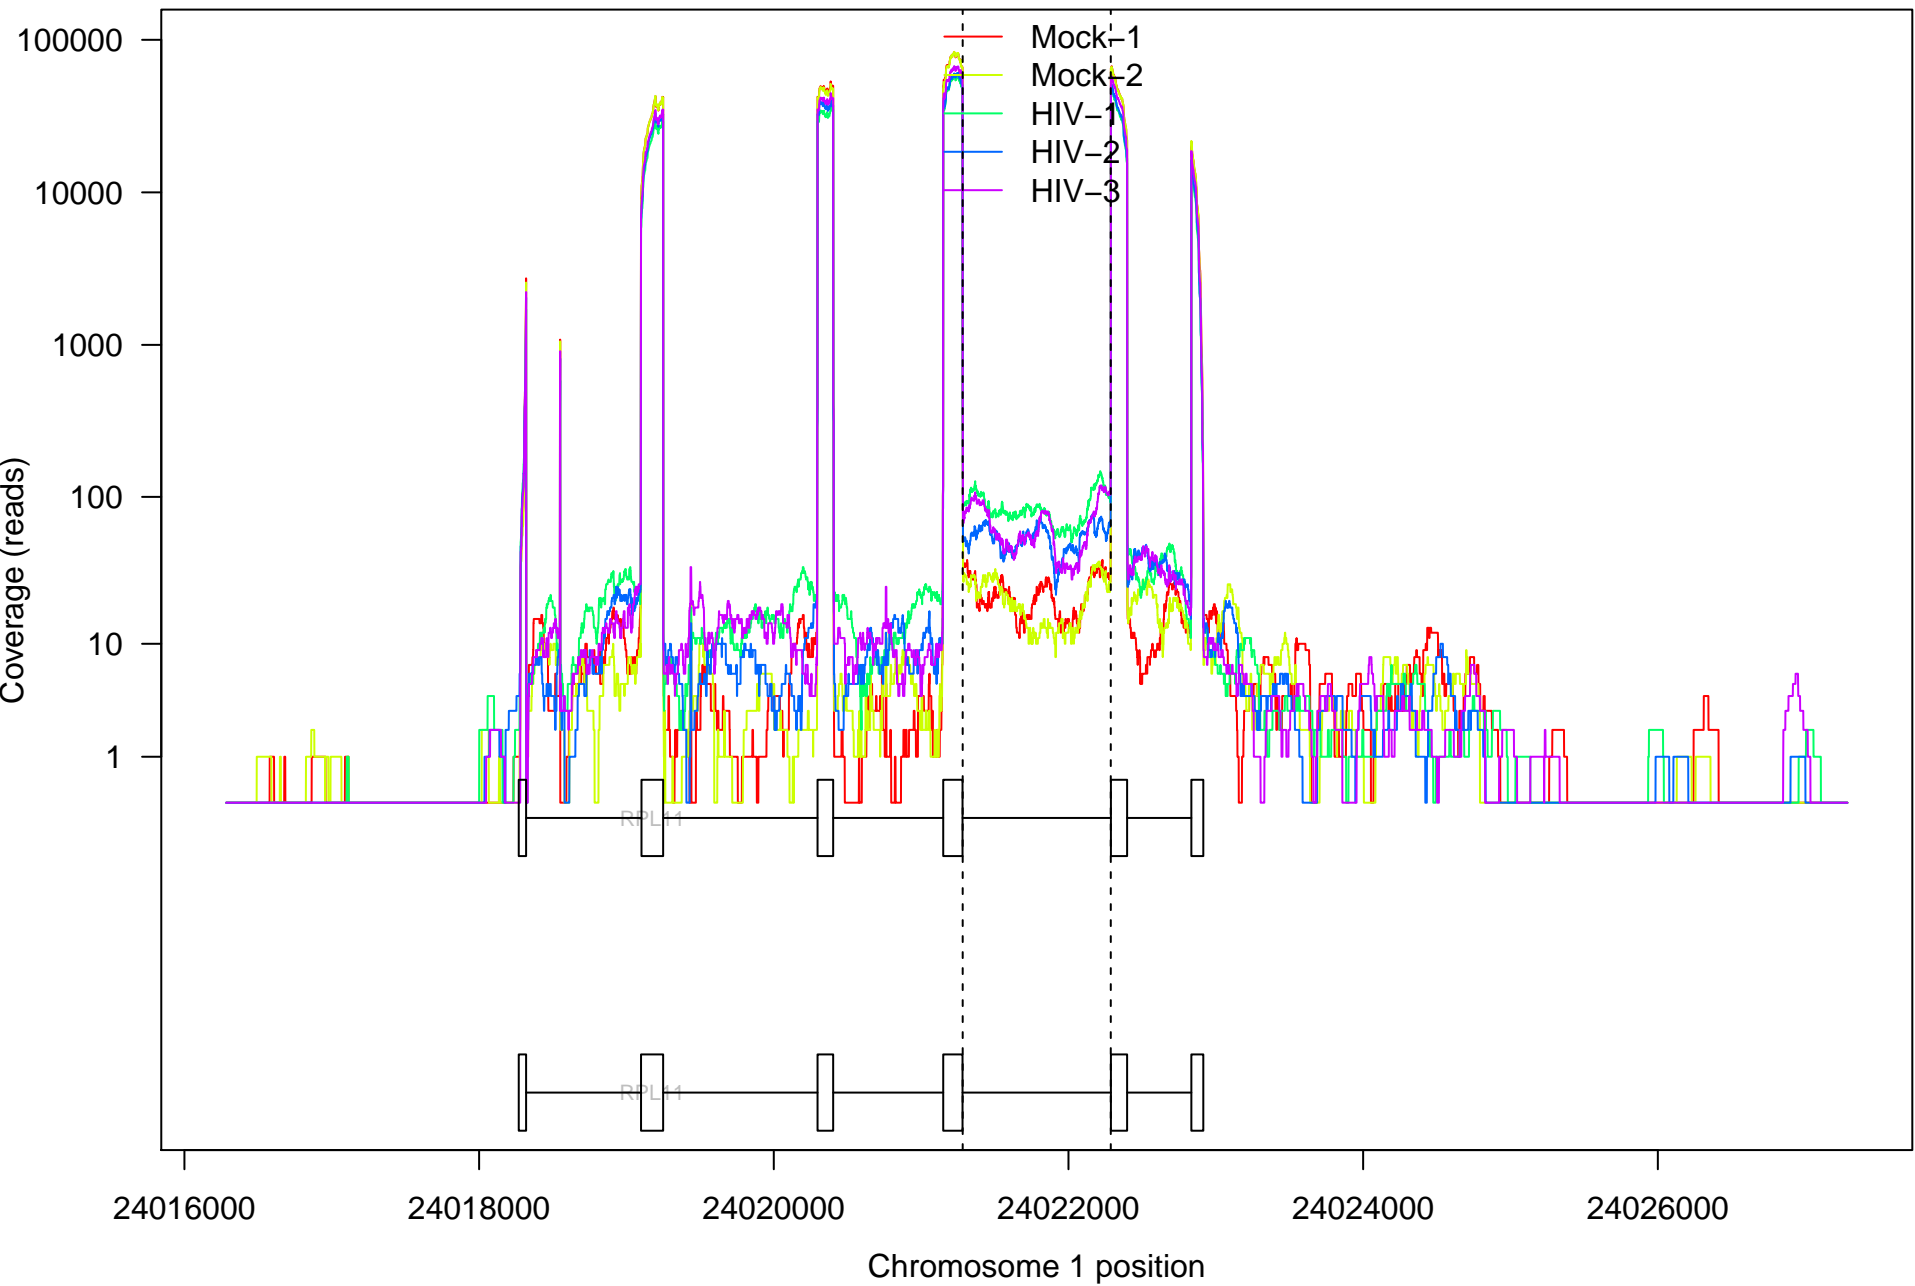

A.7

## chrX:100653556–100653772

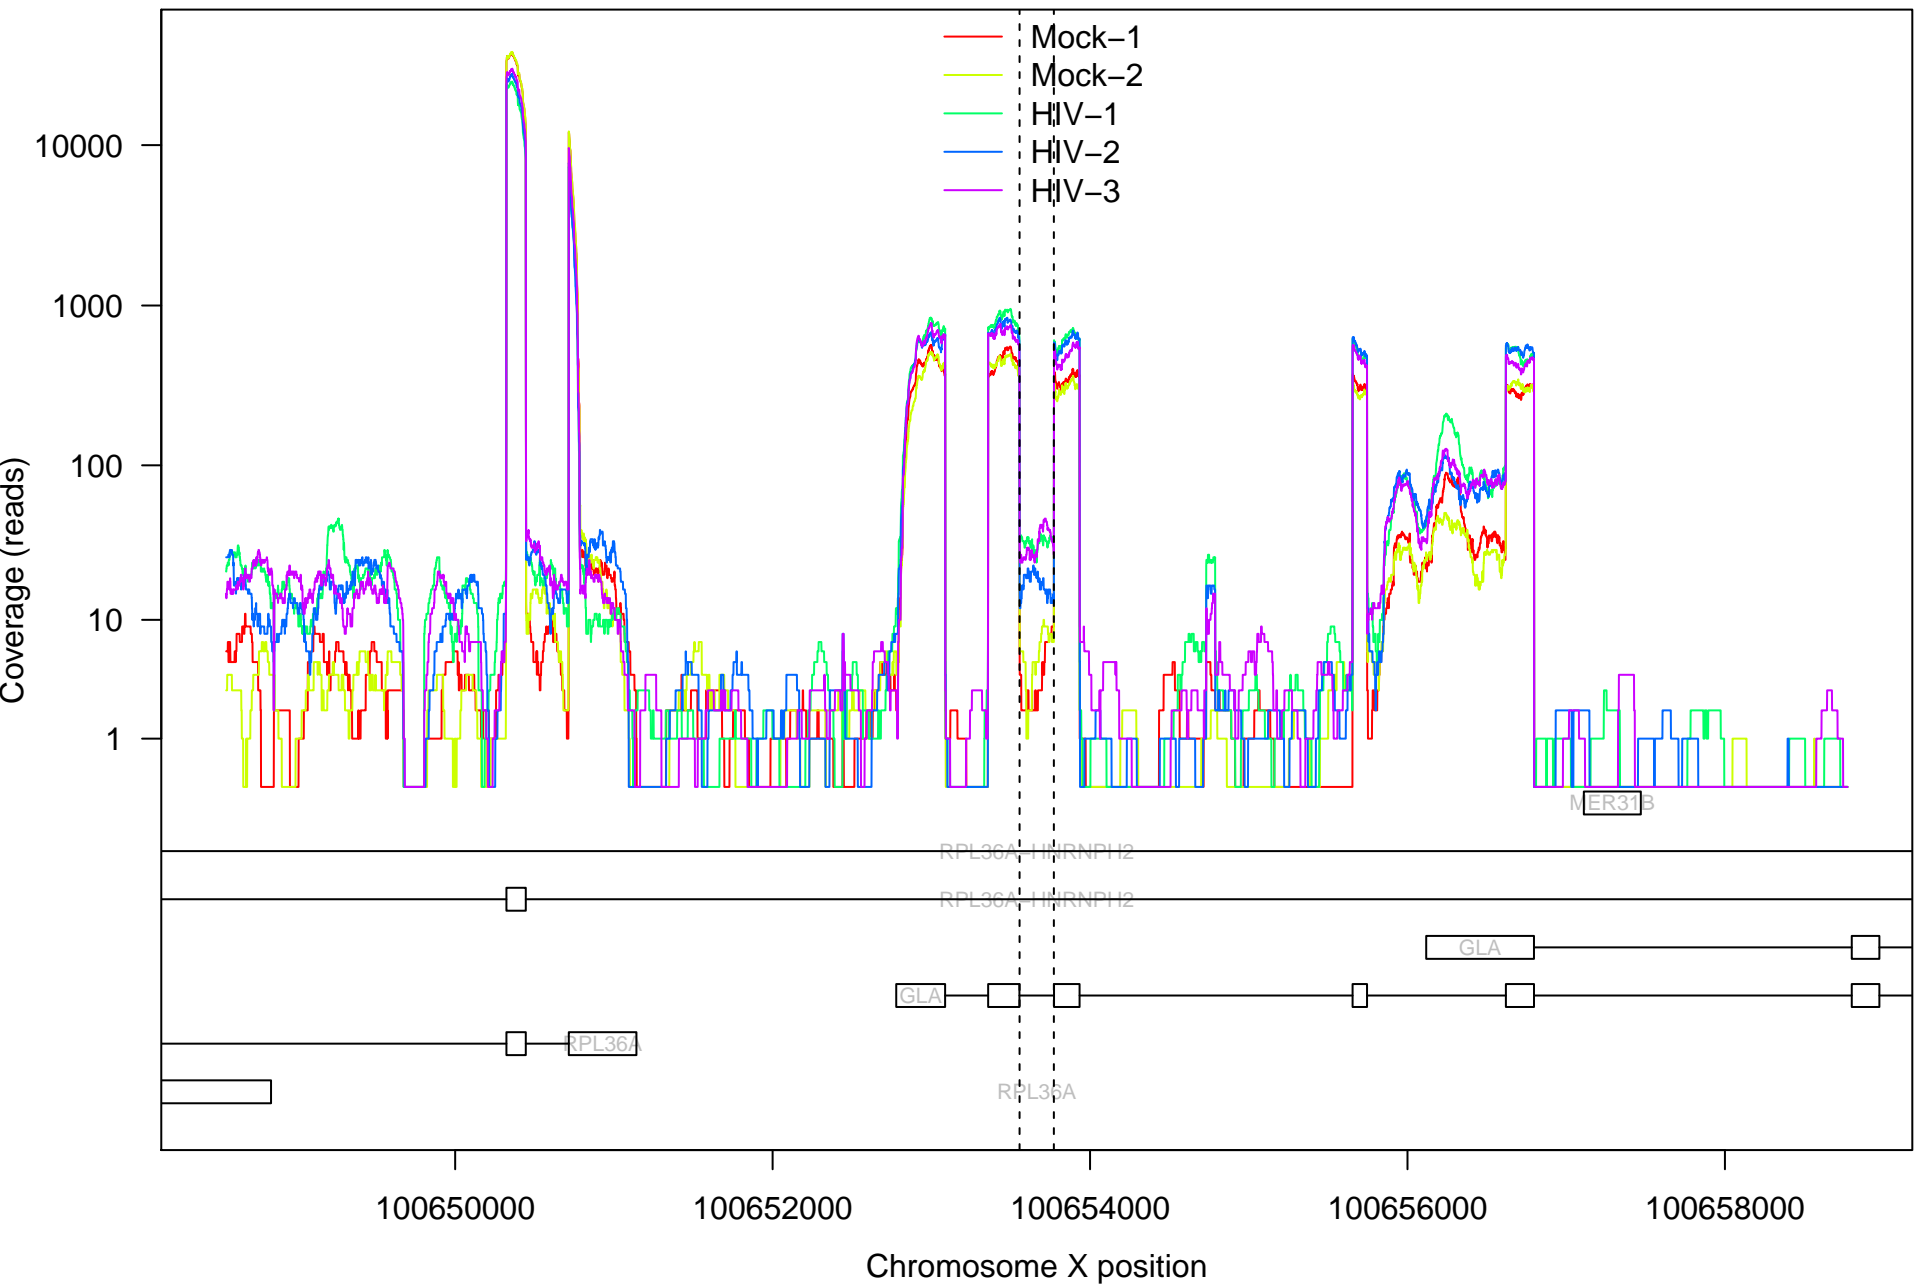

A.8

chr12:120635266-120636316

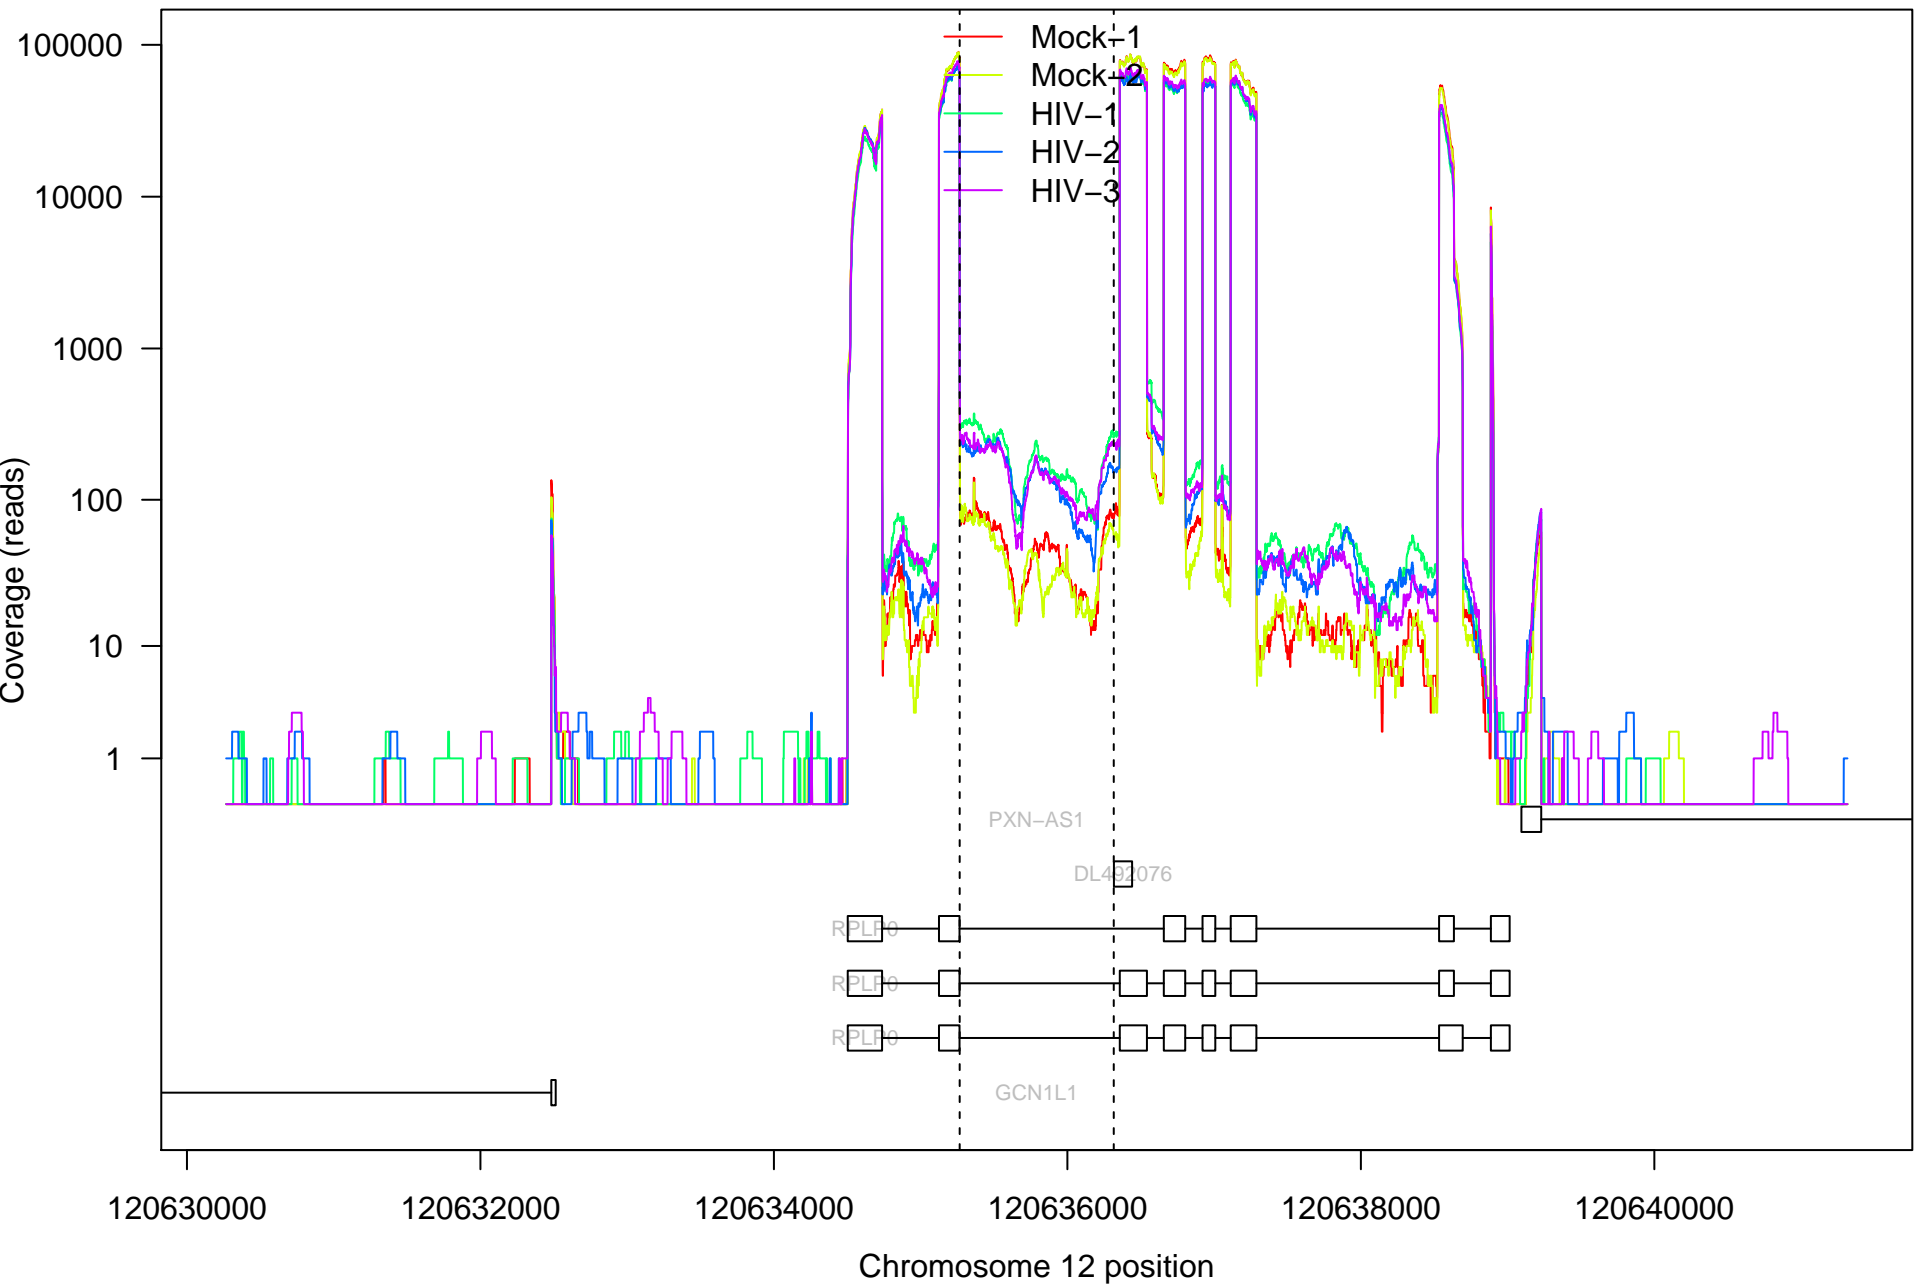



A.9

## chr19:50000853-50000975

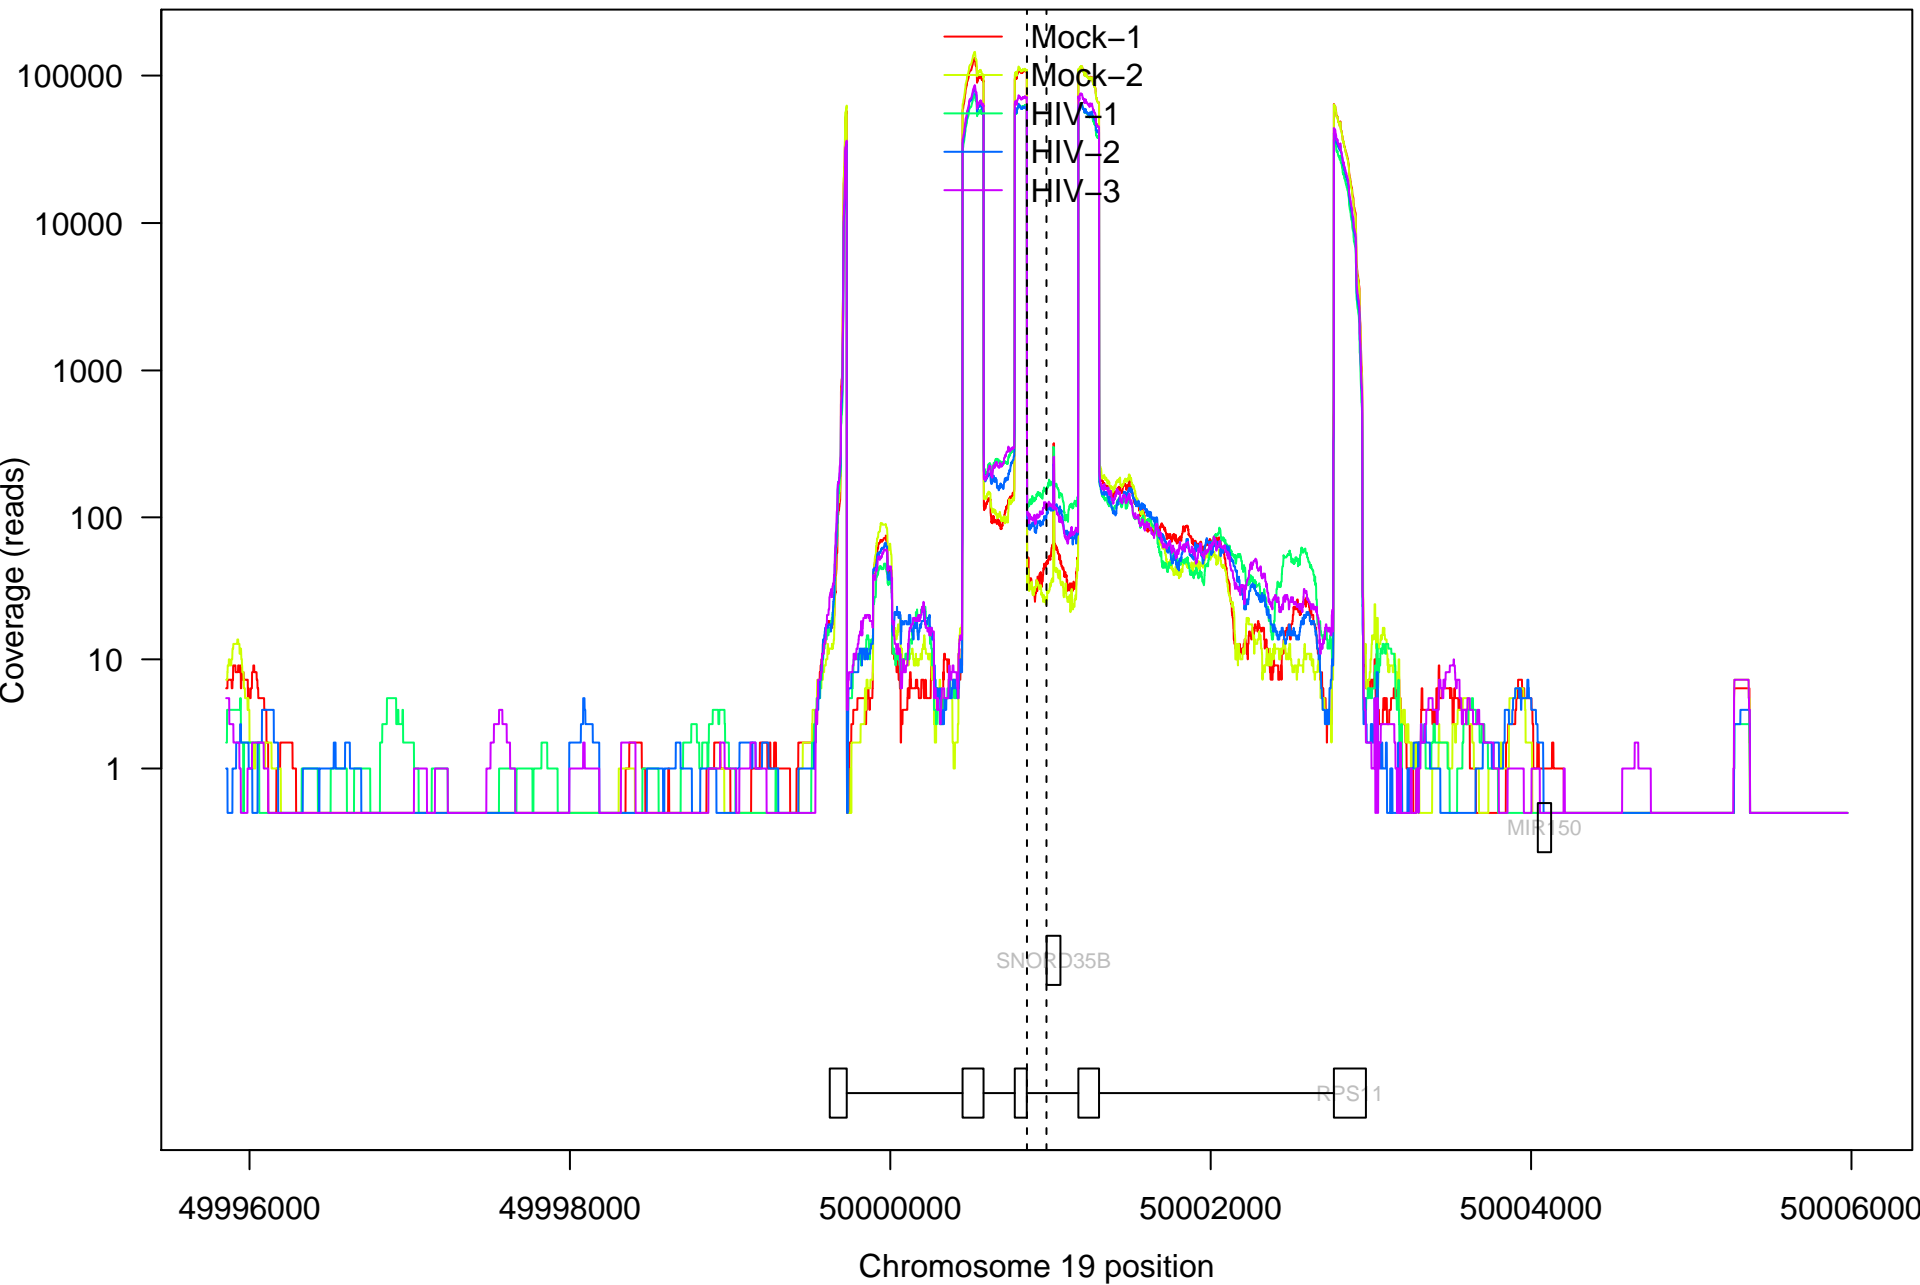

A.10

chr6:33240504–33243276

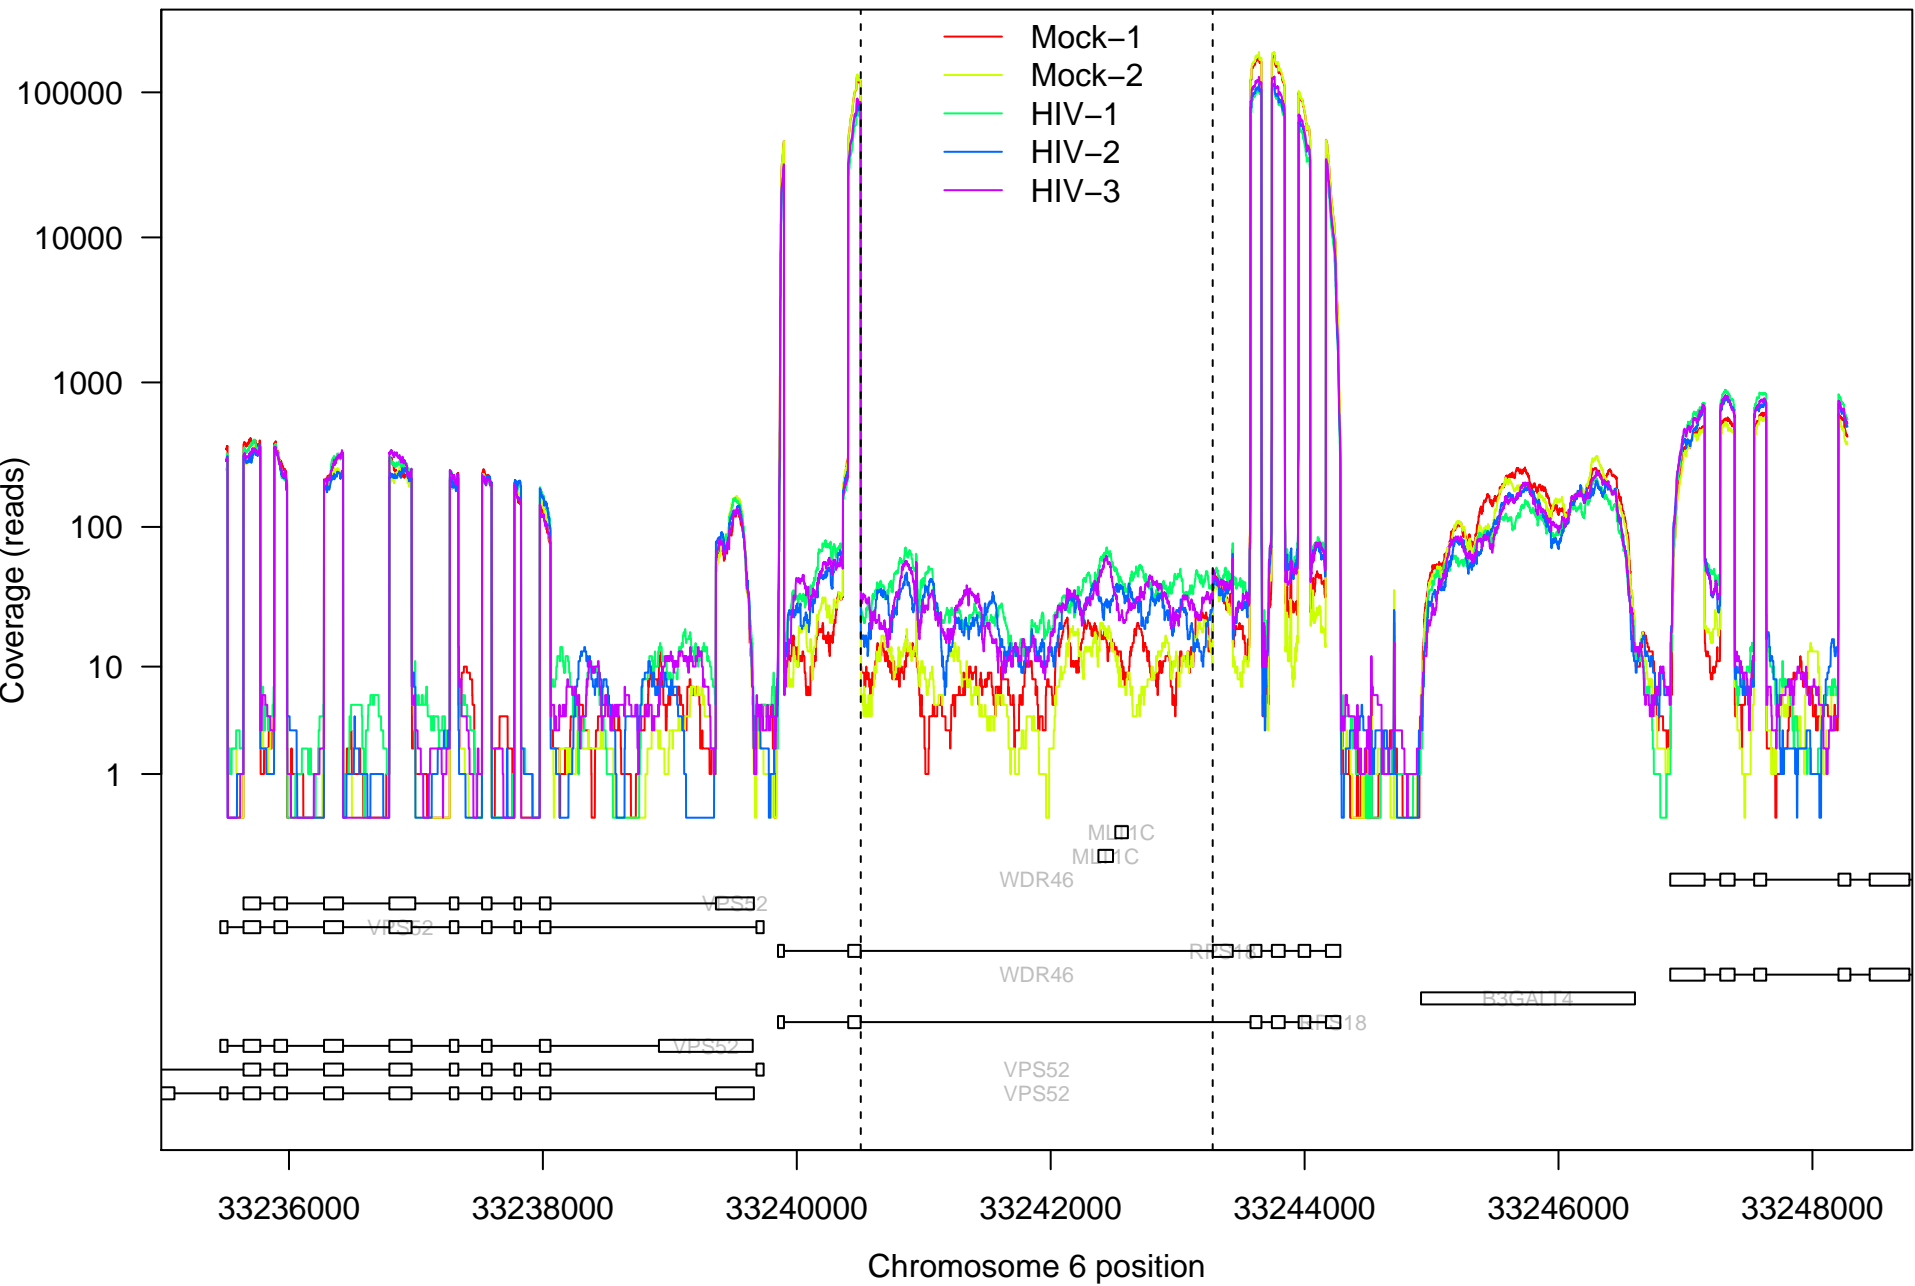

A.11

chr6:42176111-42176595

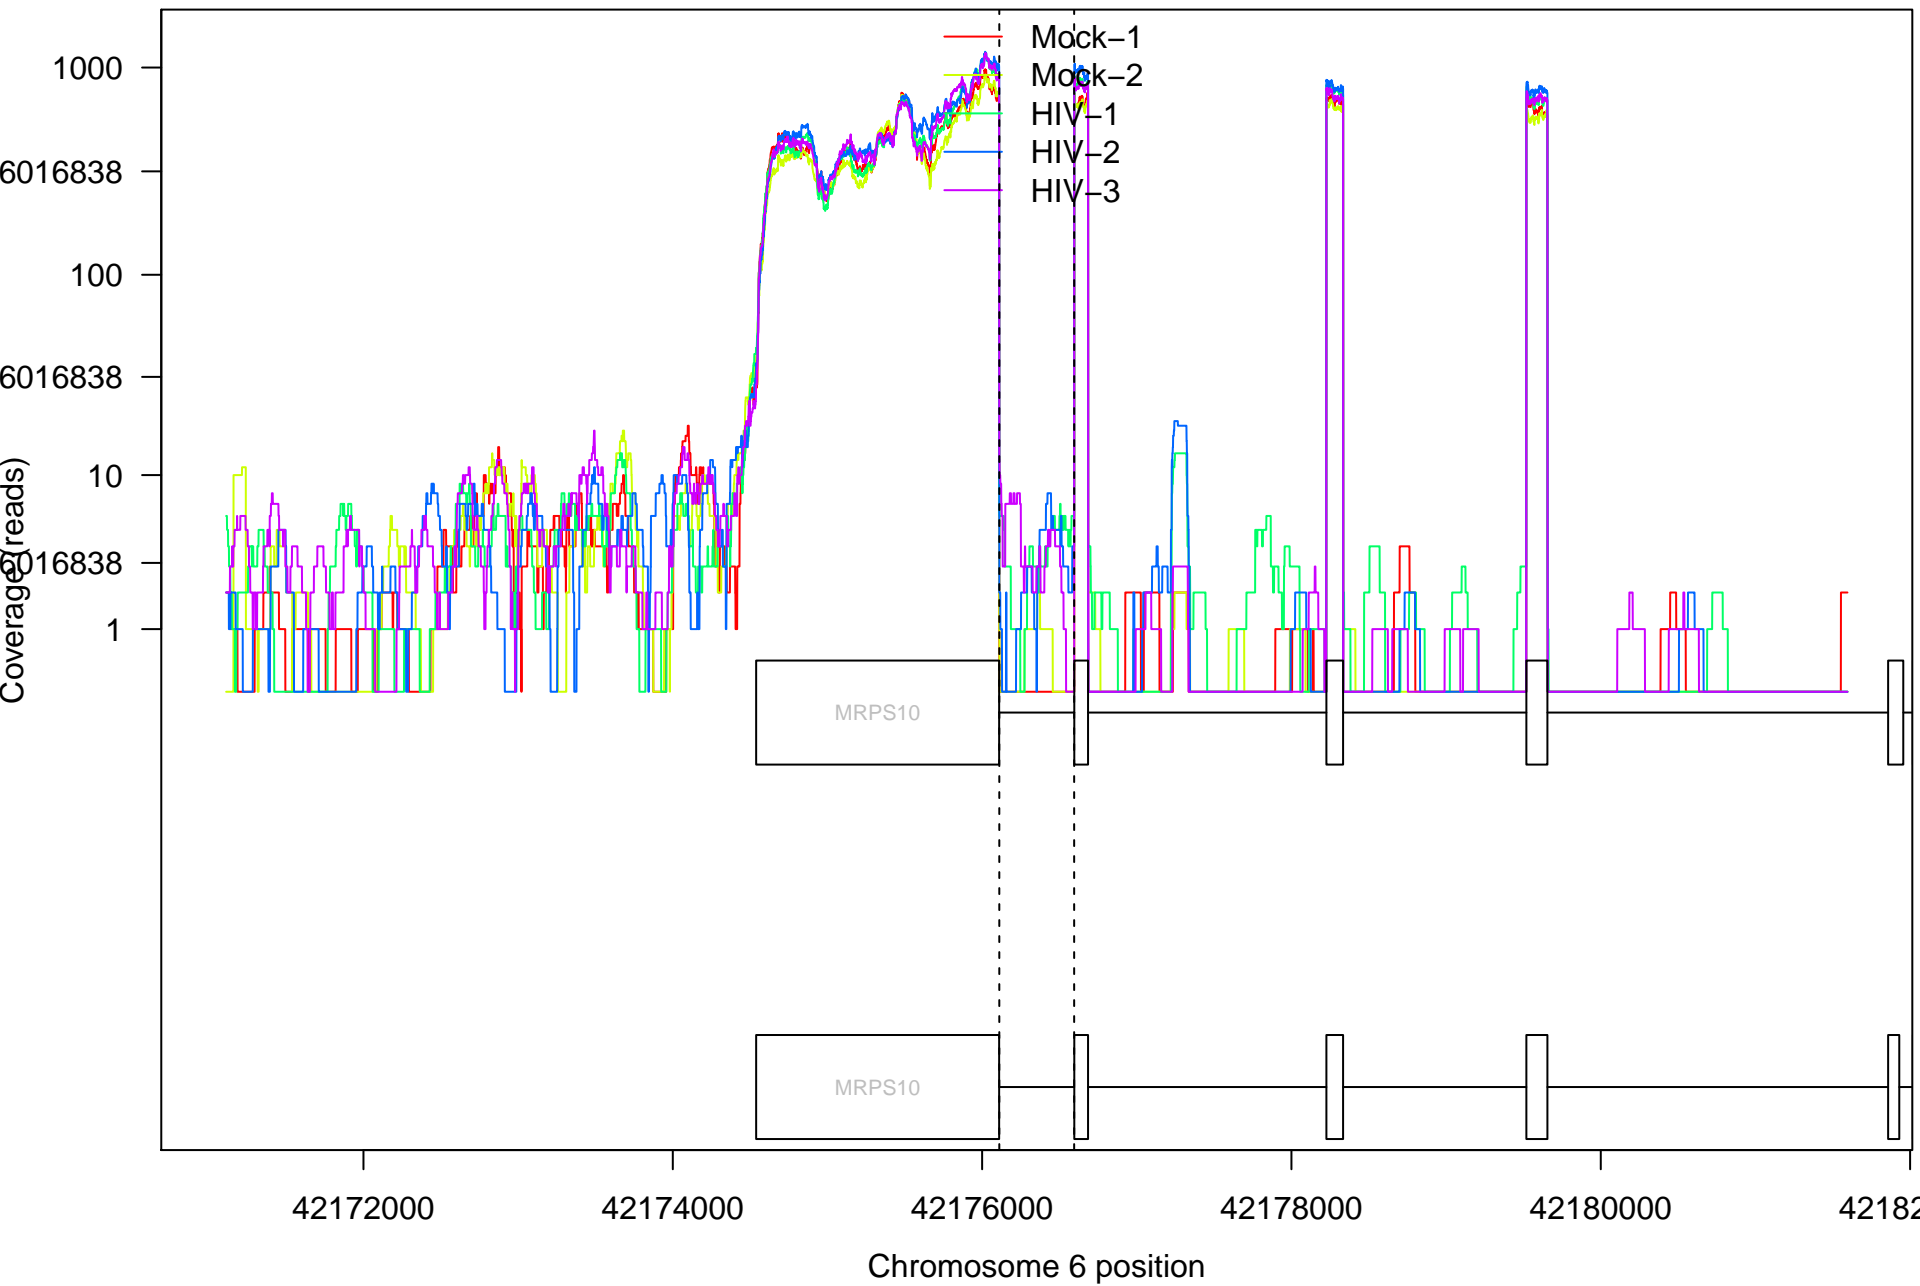

A.12

chr22:39709735-39710111

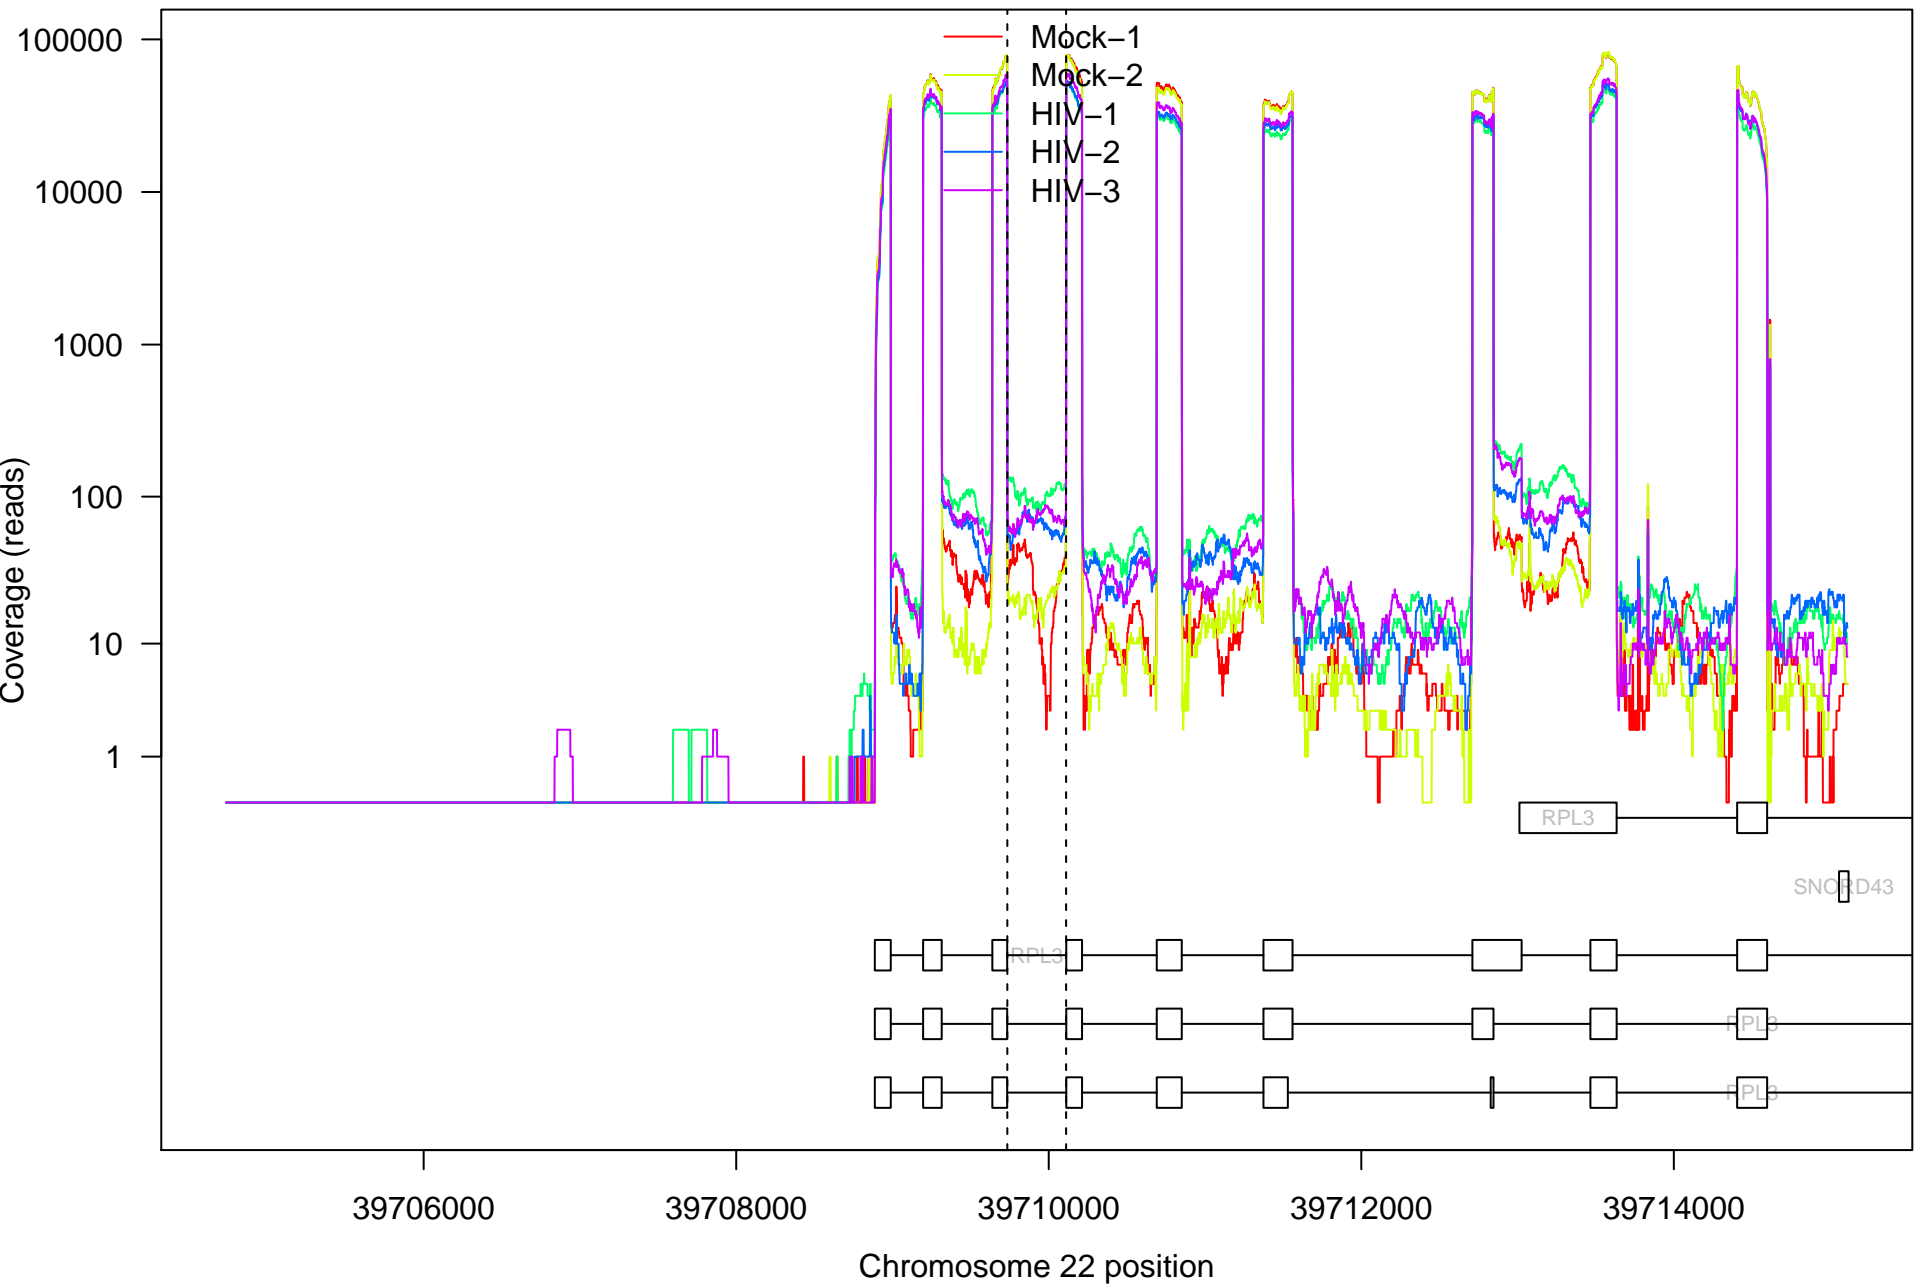

A.13

chr6:35437307-35437955

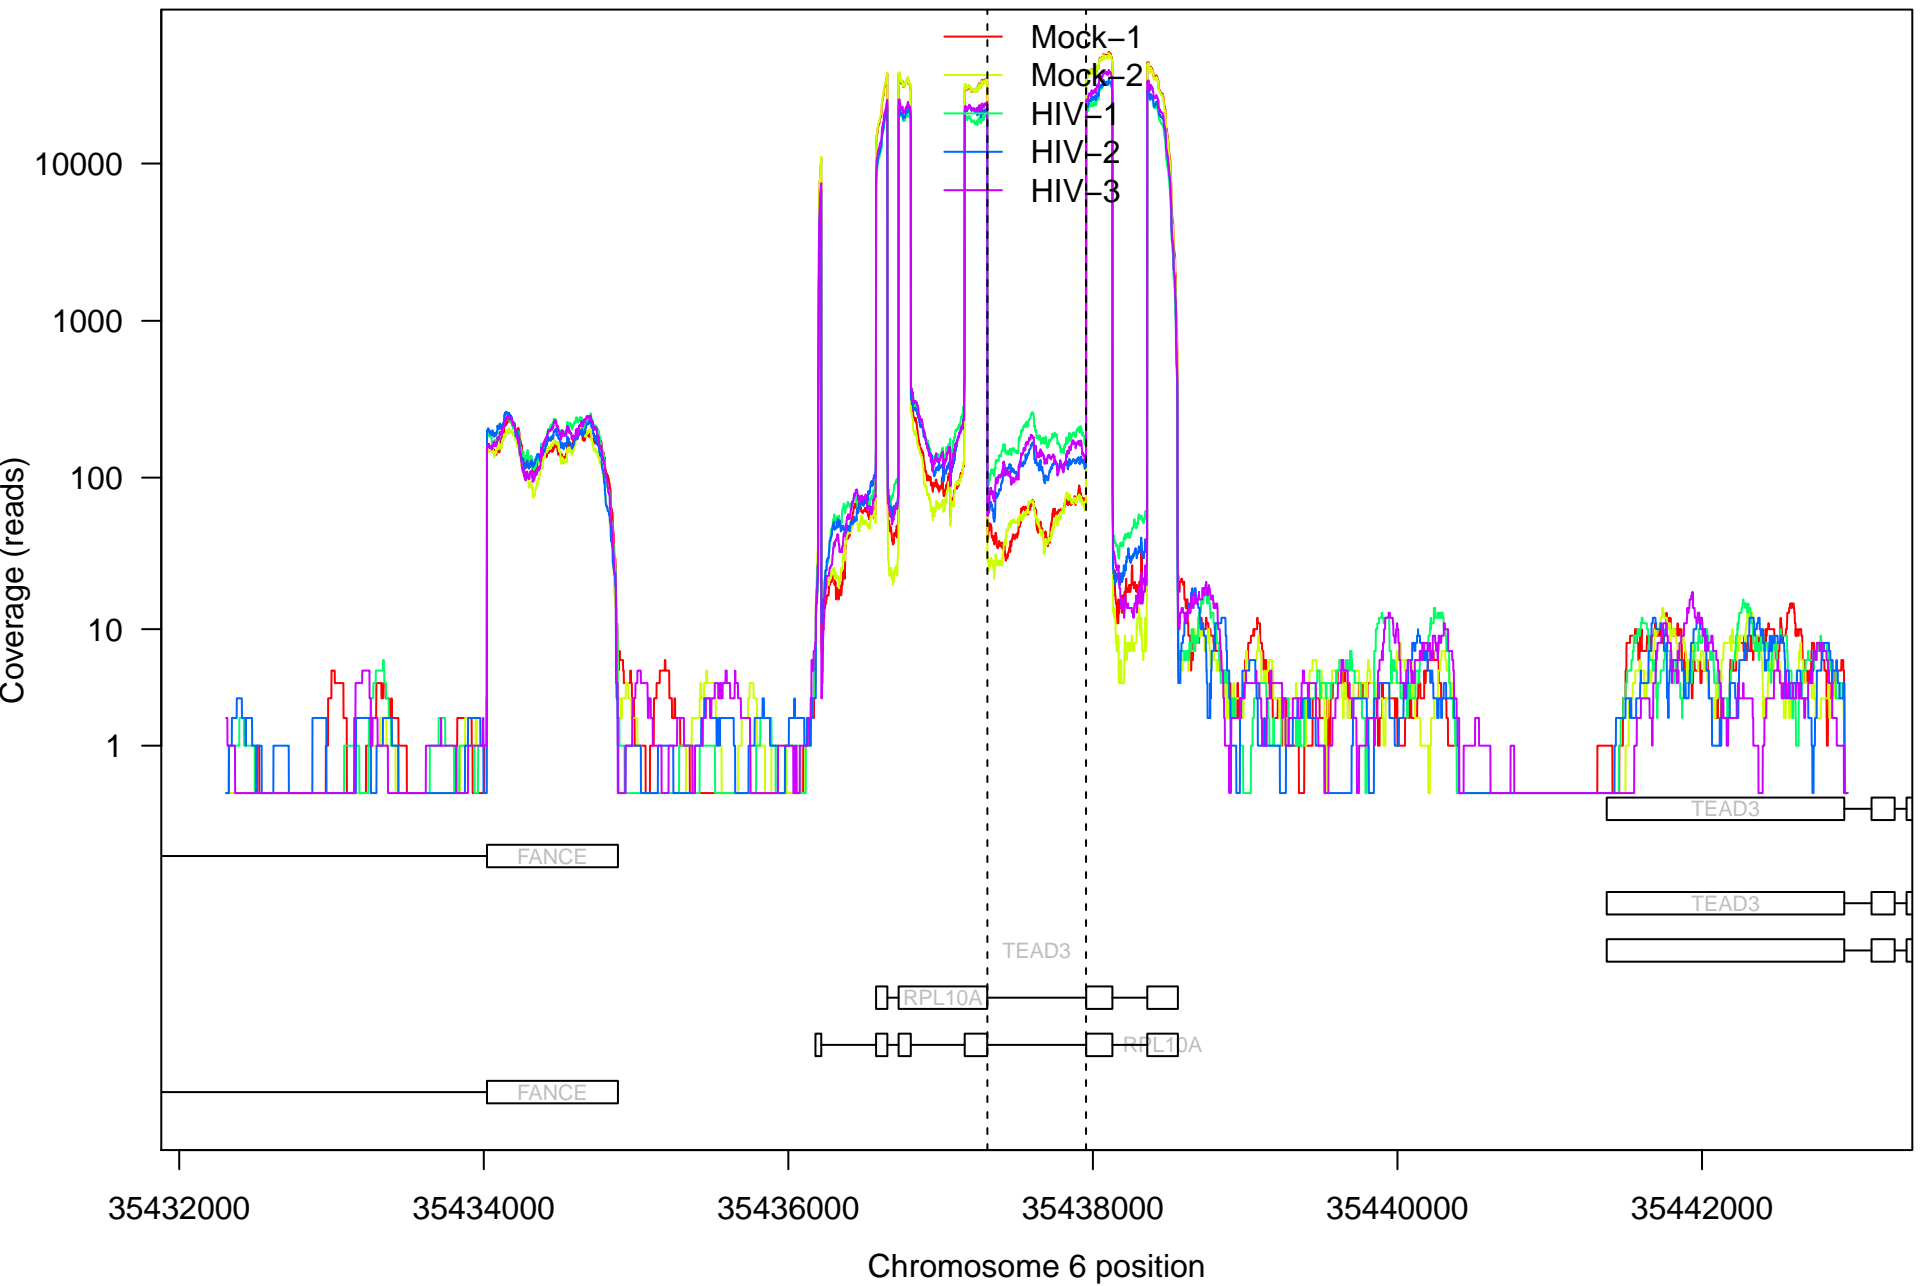

A.14

chr6:34389585-34392445

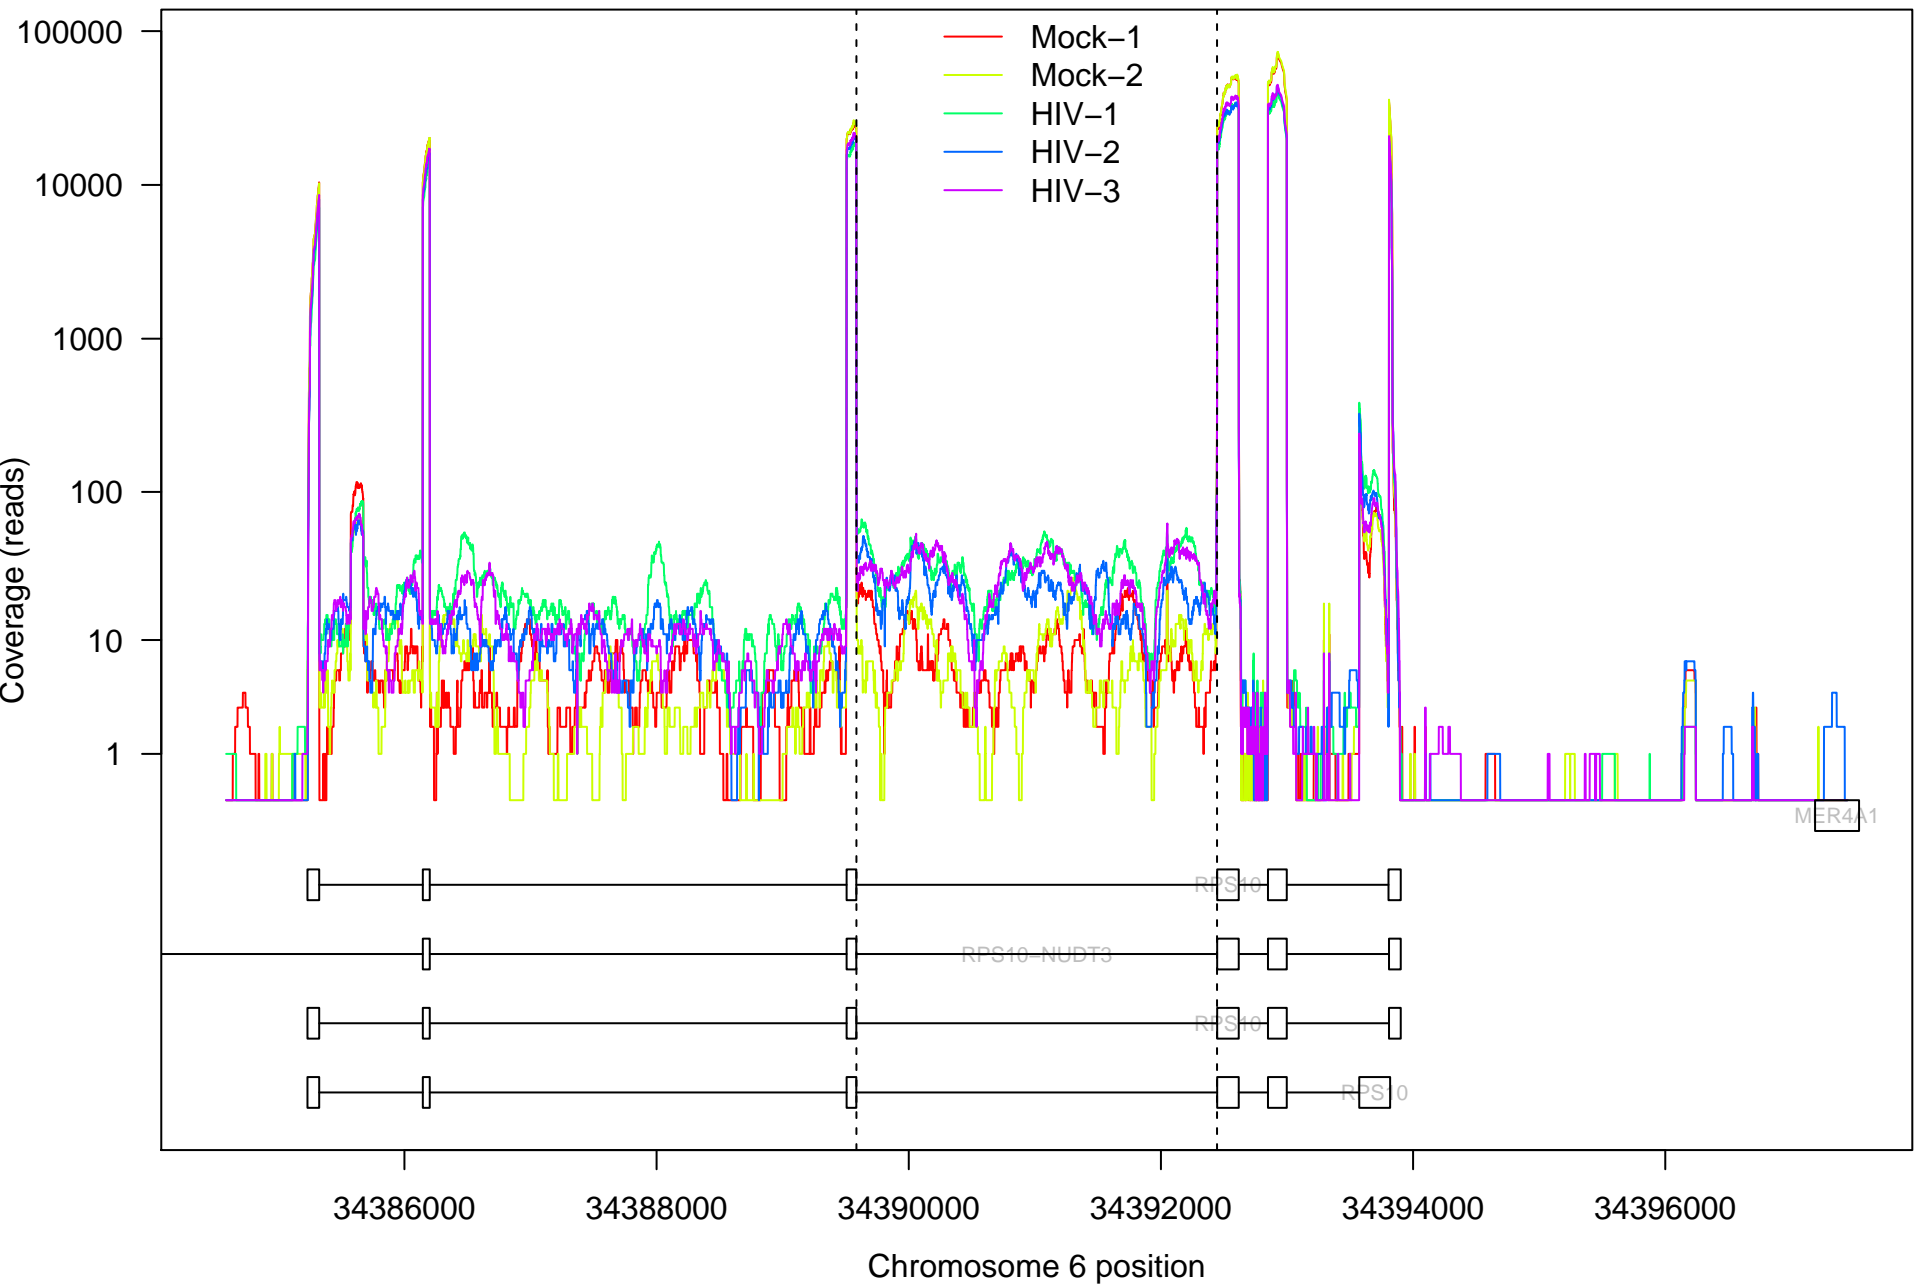

A.15

chr19:50001063-50001173

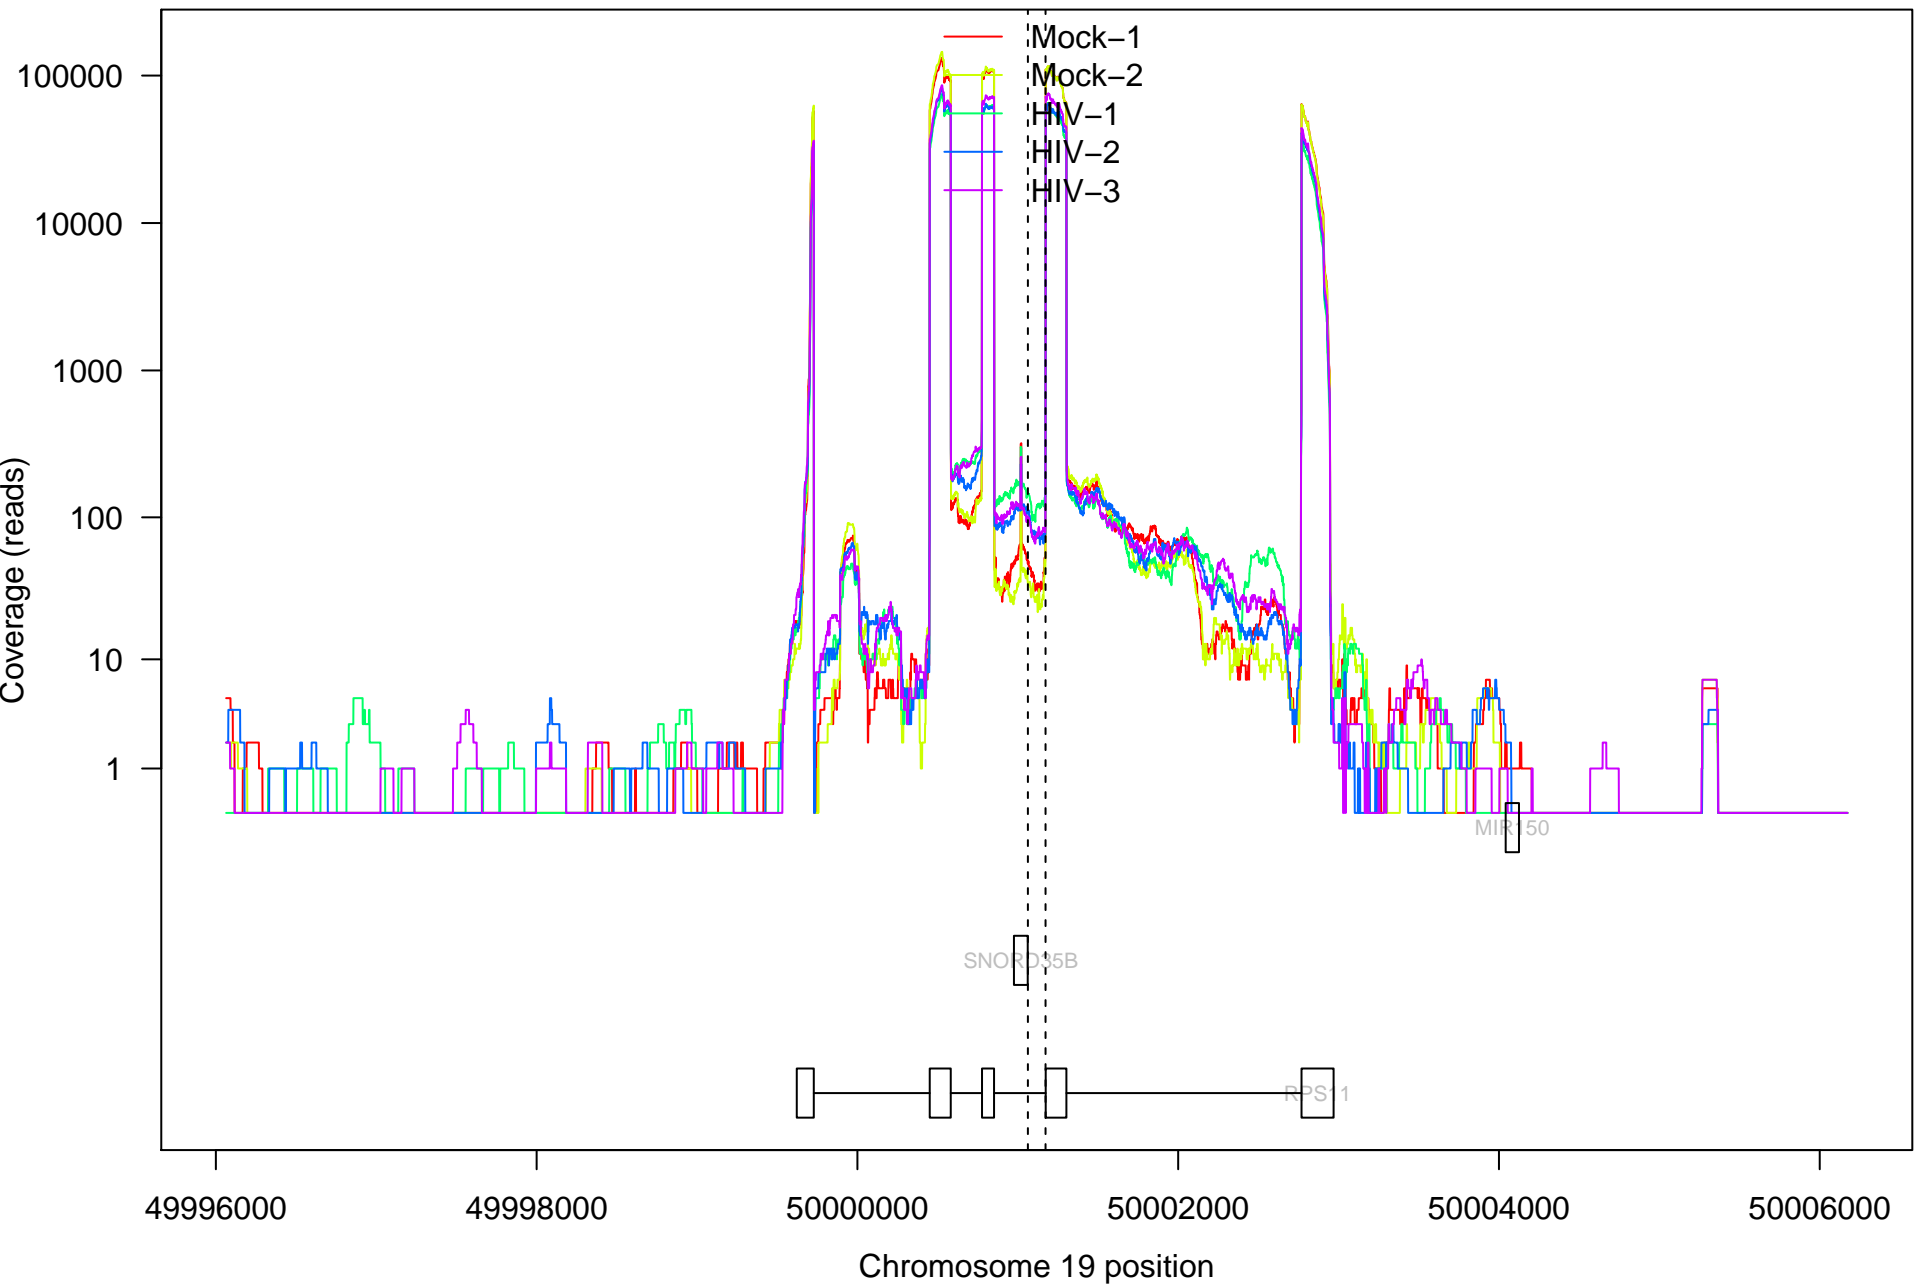

A.16

chr9:136217583-136217700

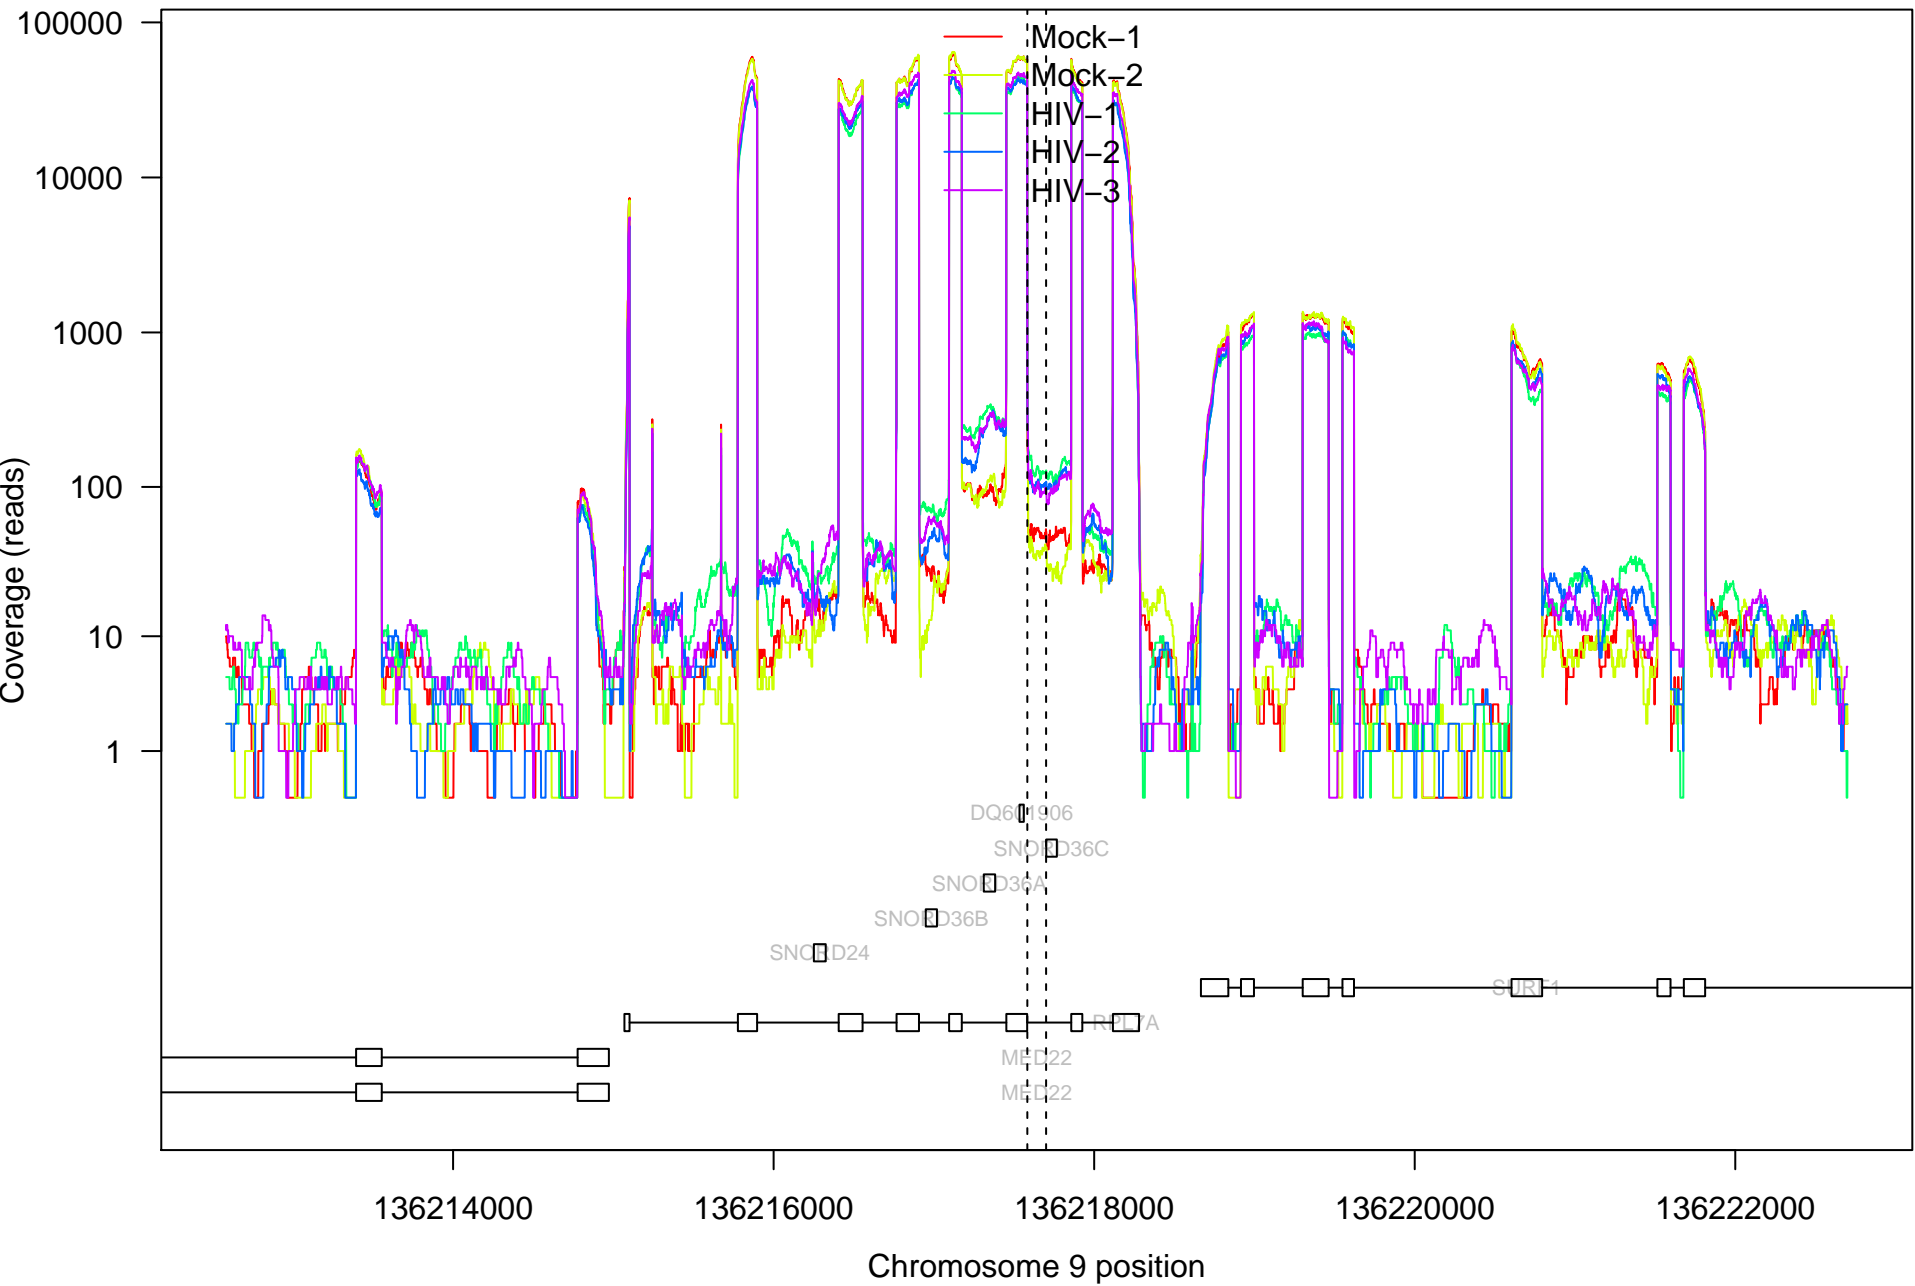



A.17

chr15:66793843-66794125

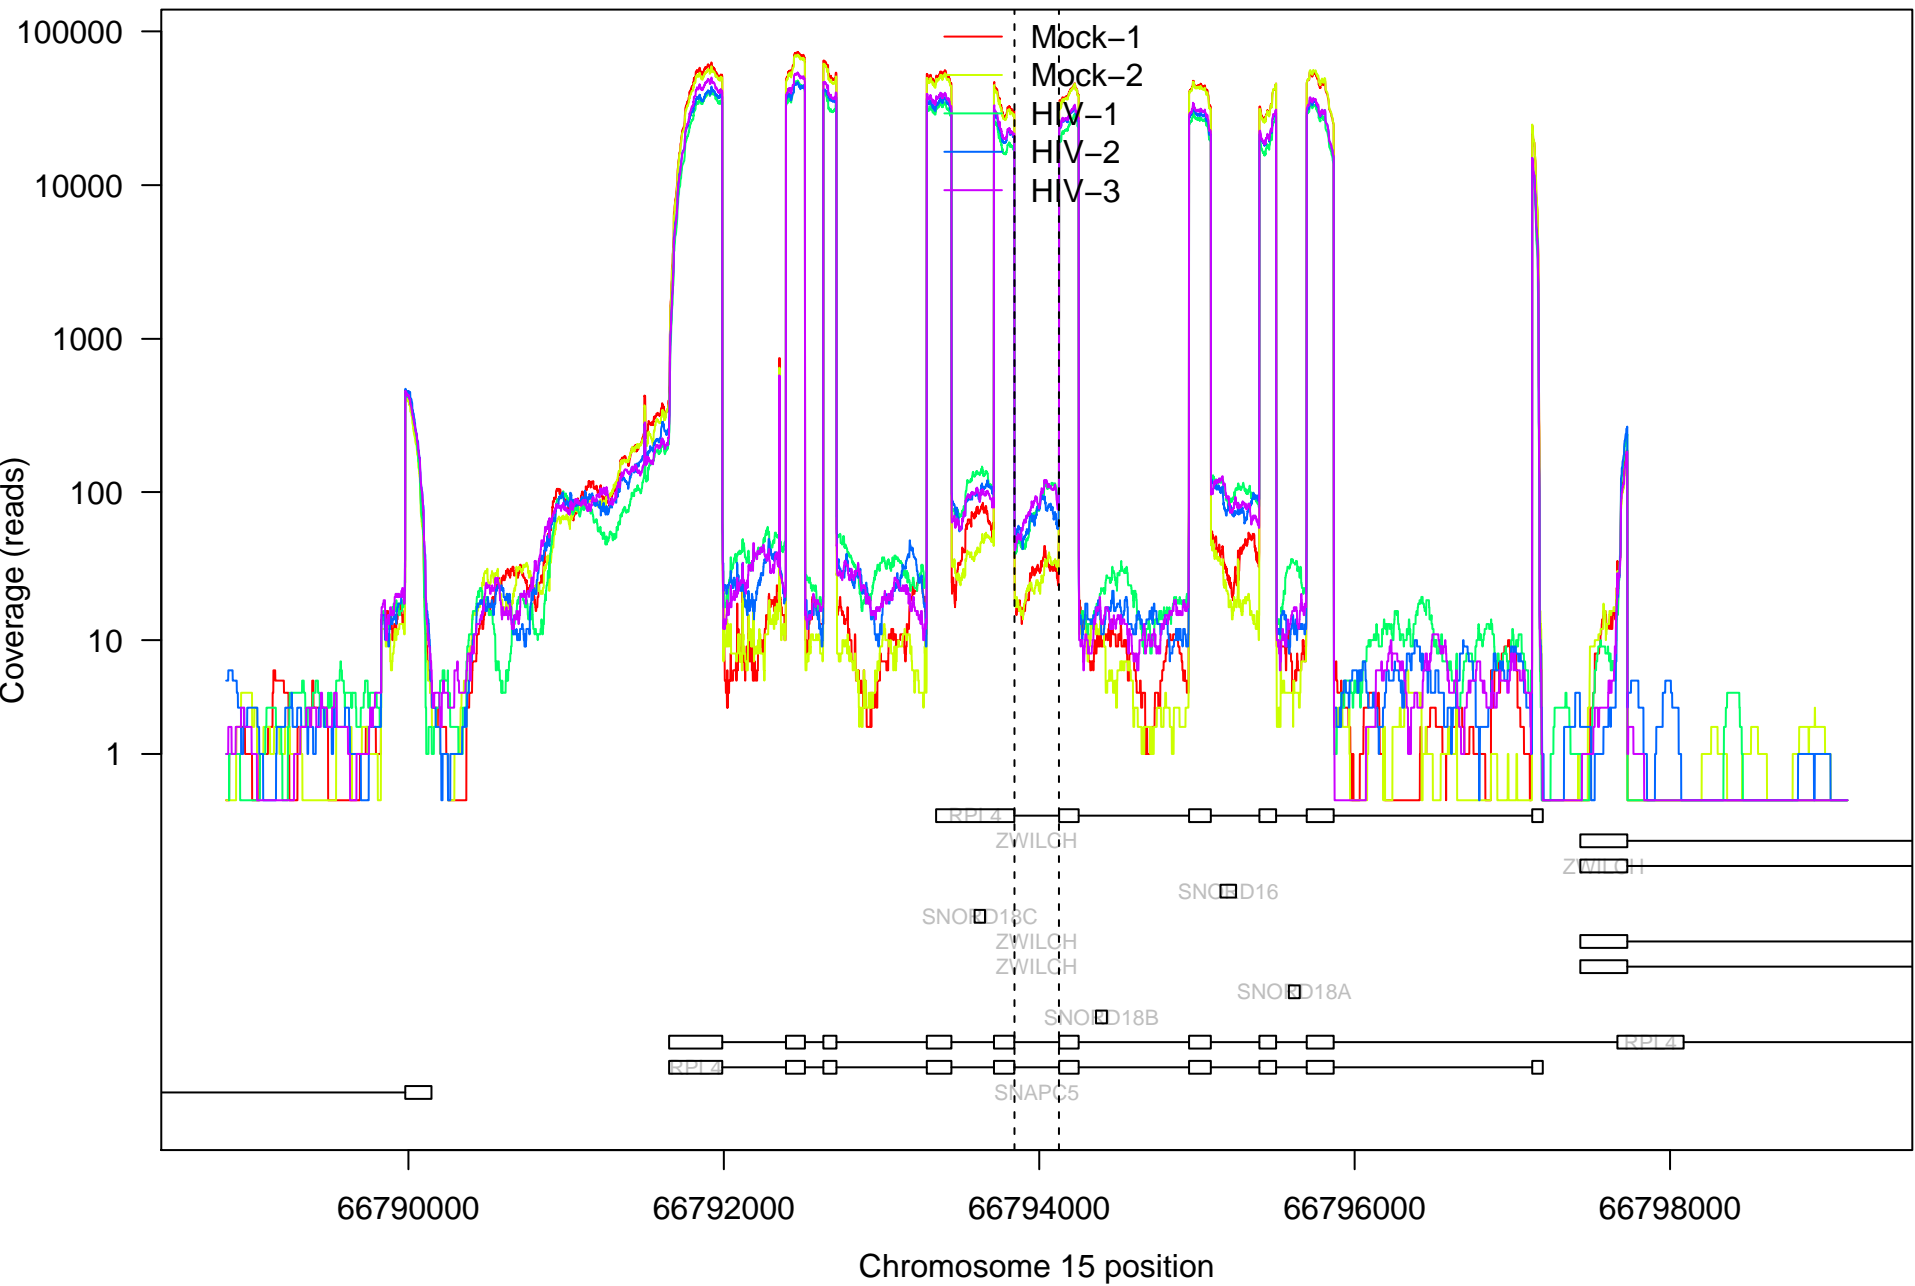

A.18

chr22:39709316-39709638

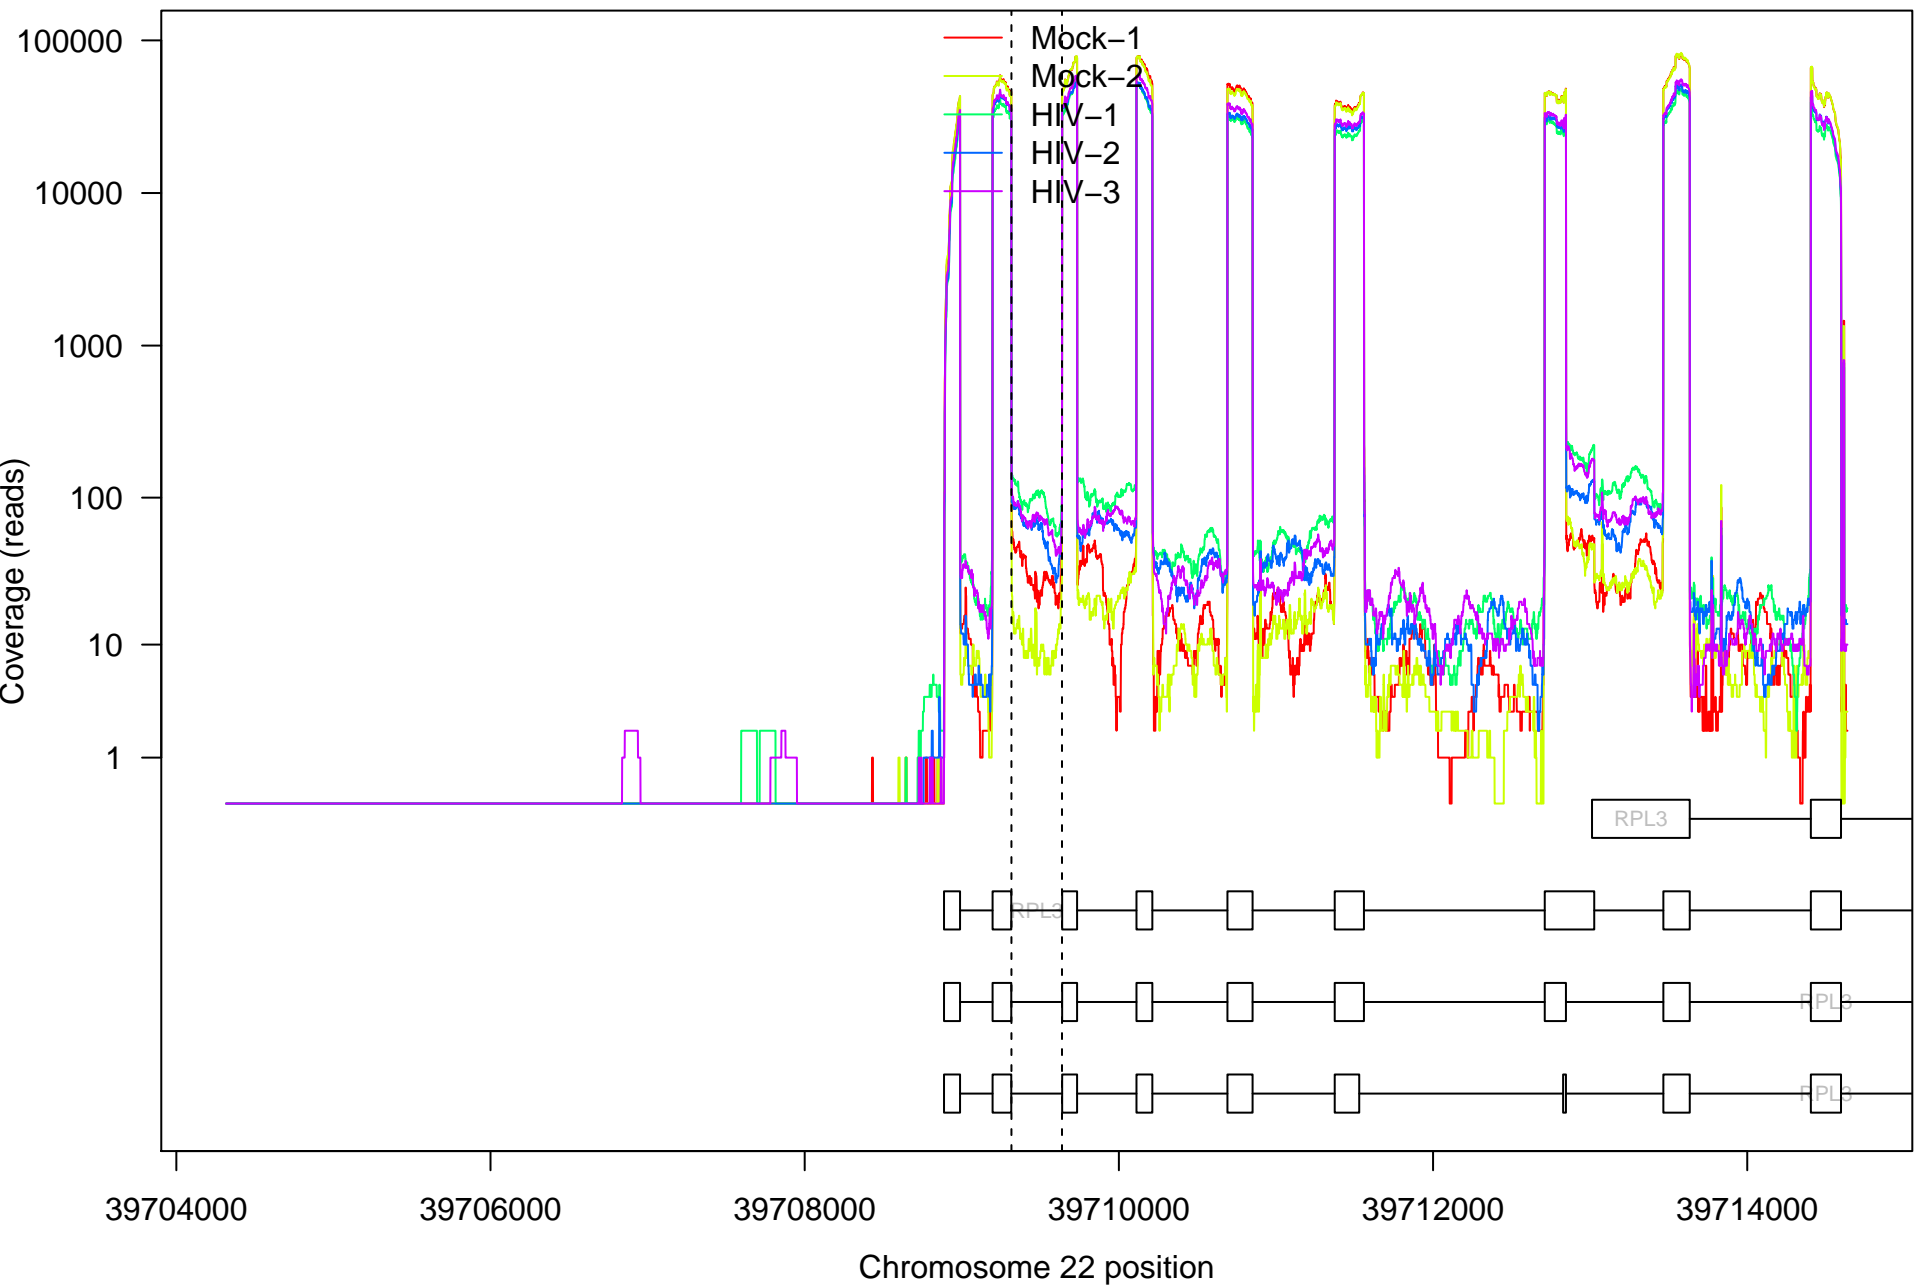

A.19

chr3:101400060-101401272

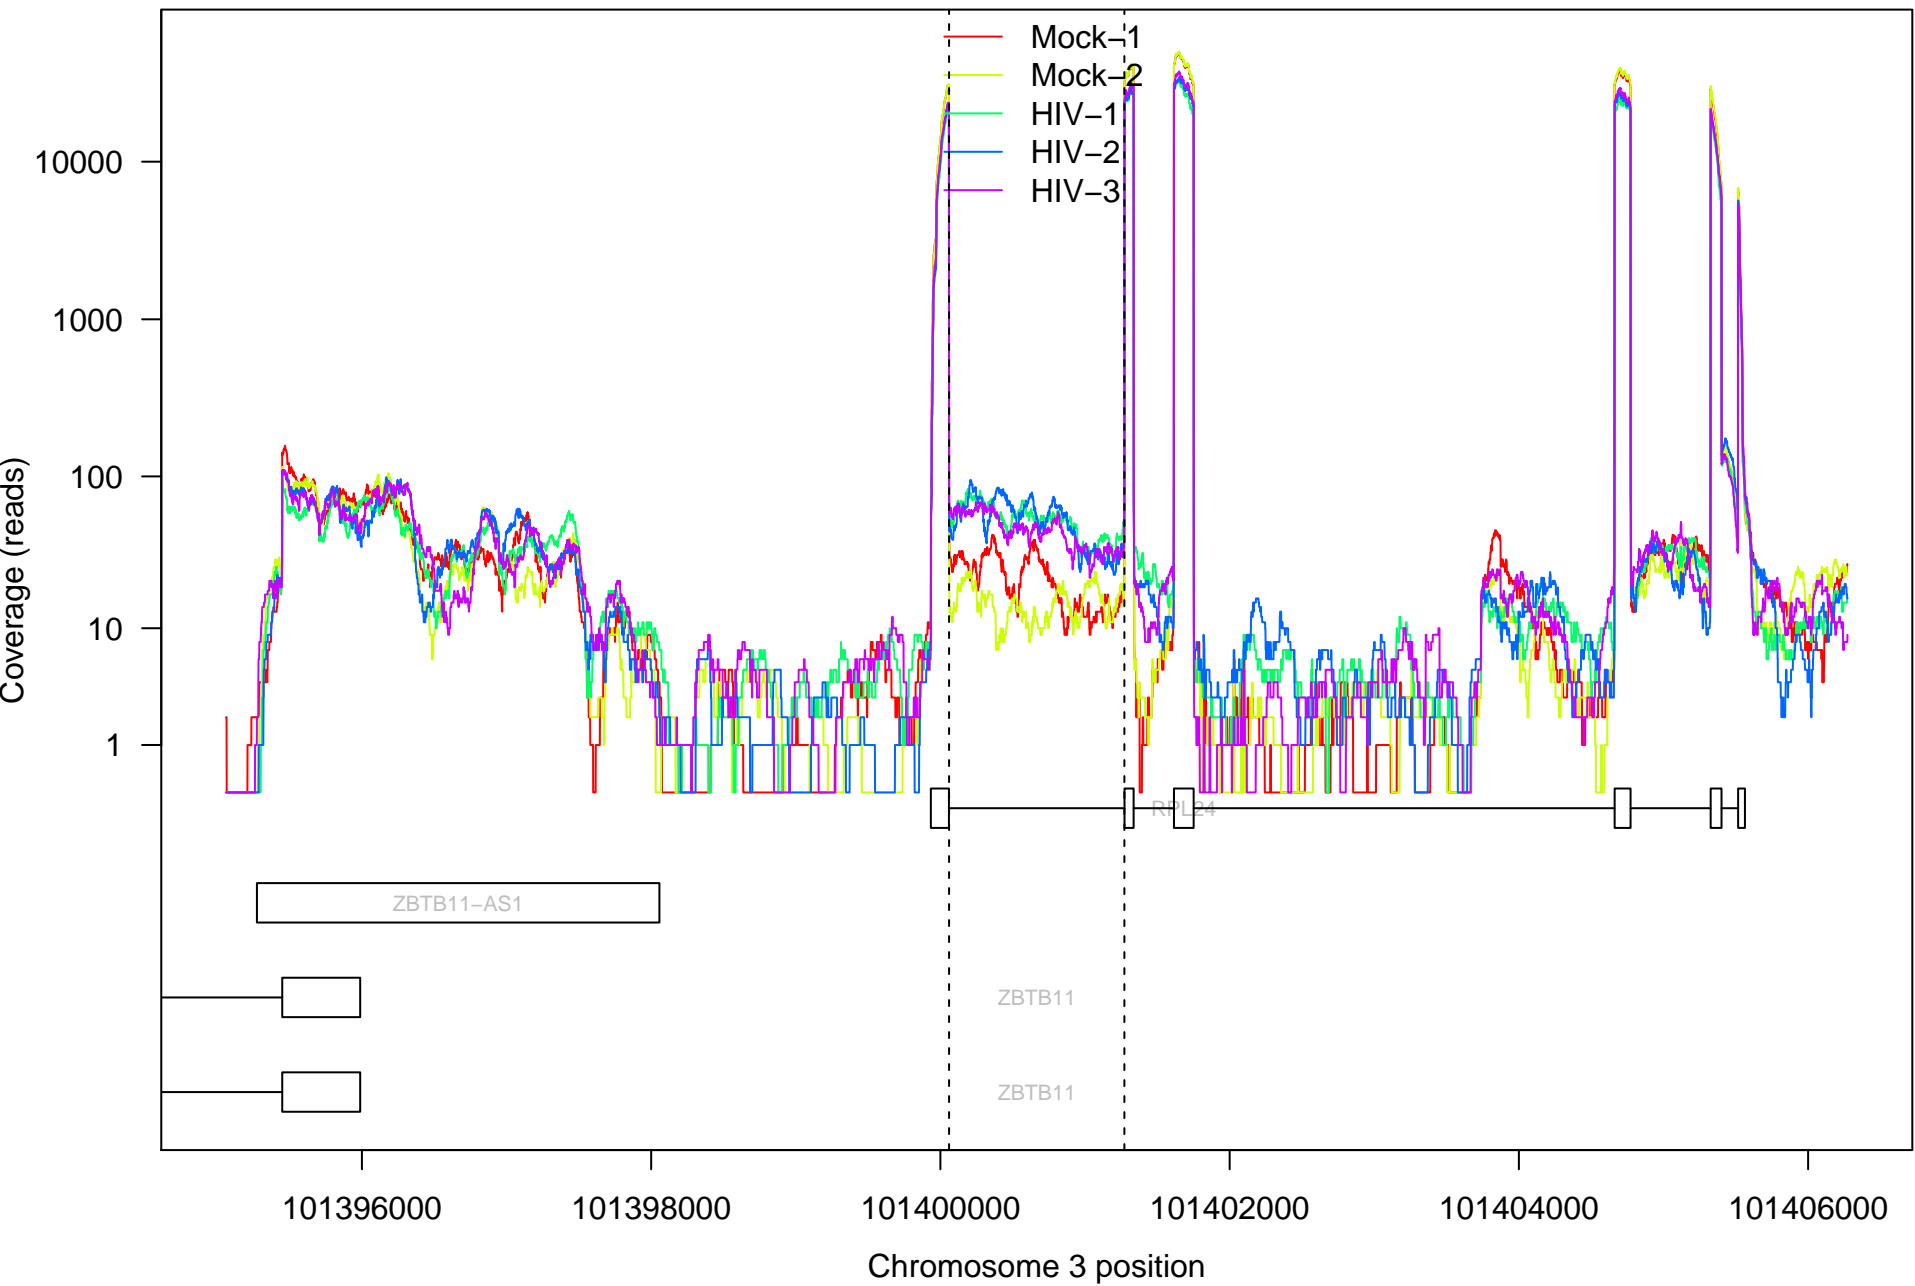

A.20

chr6:34386202-34389506

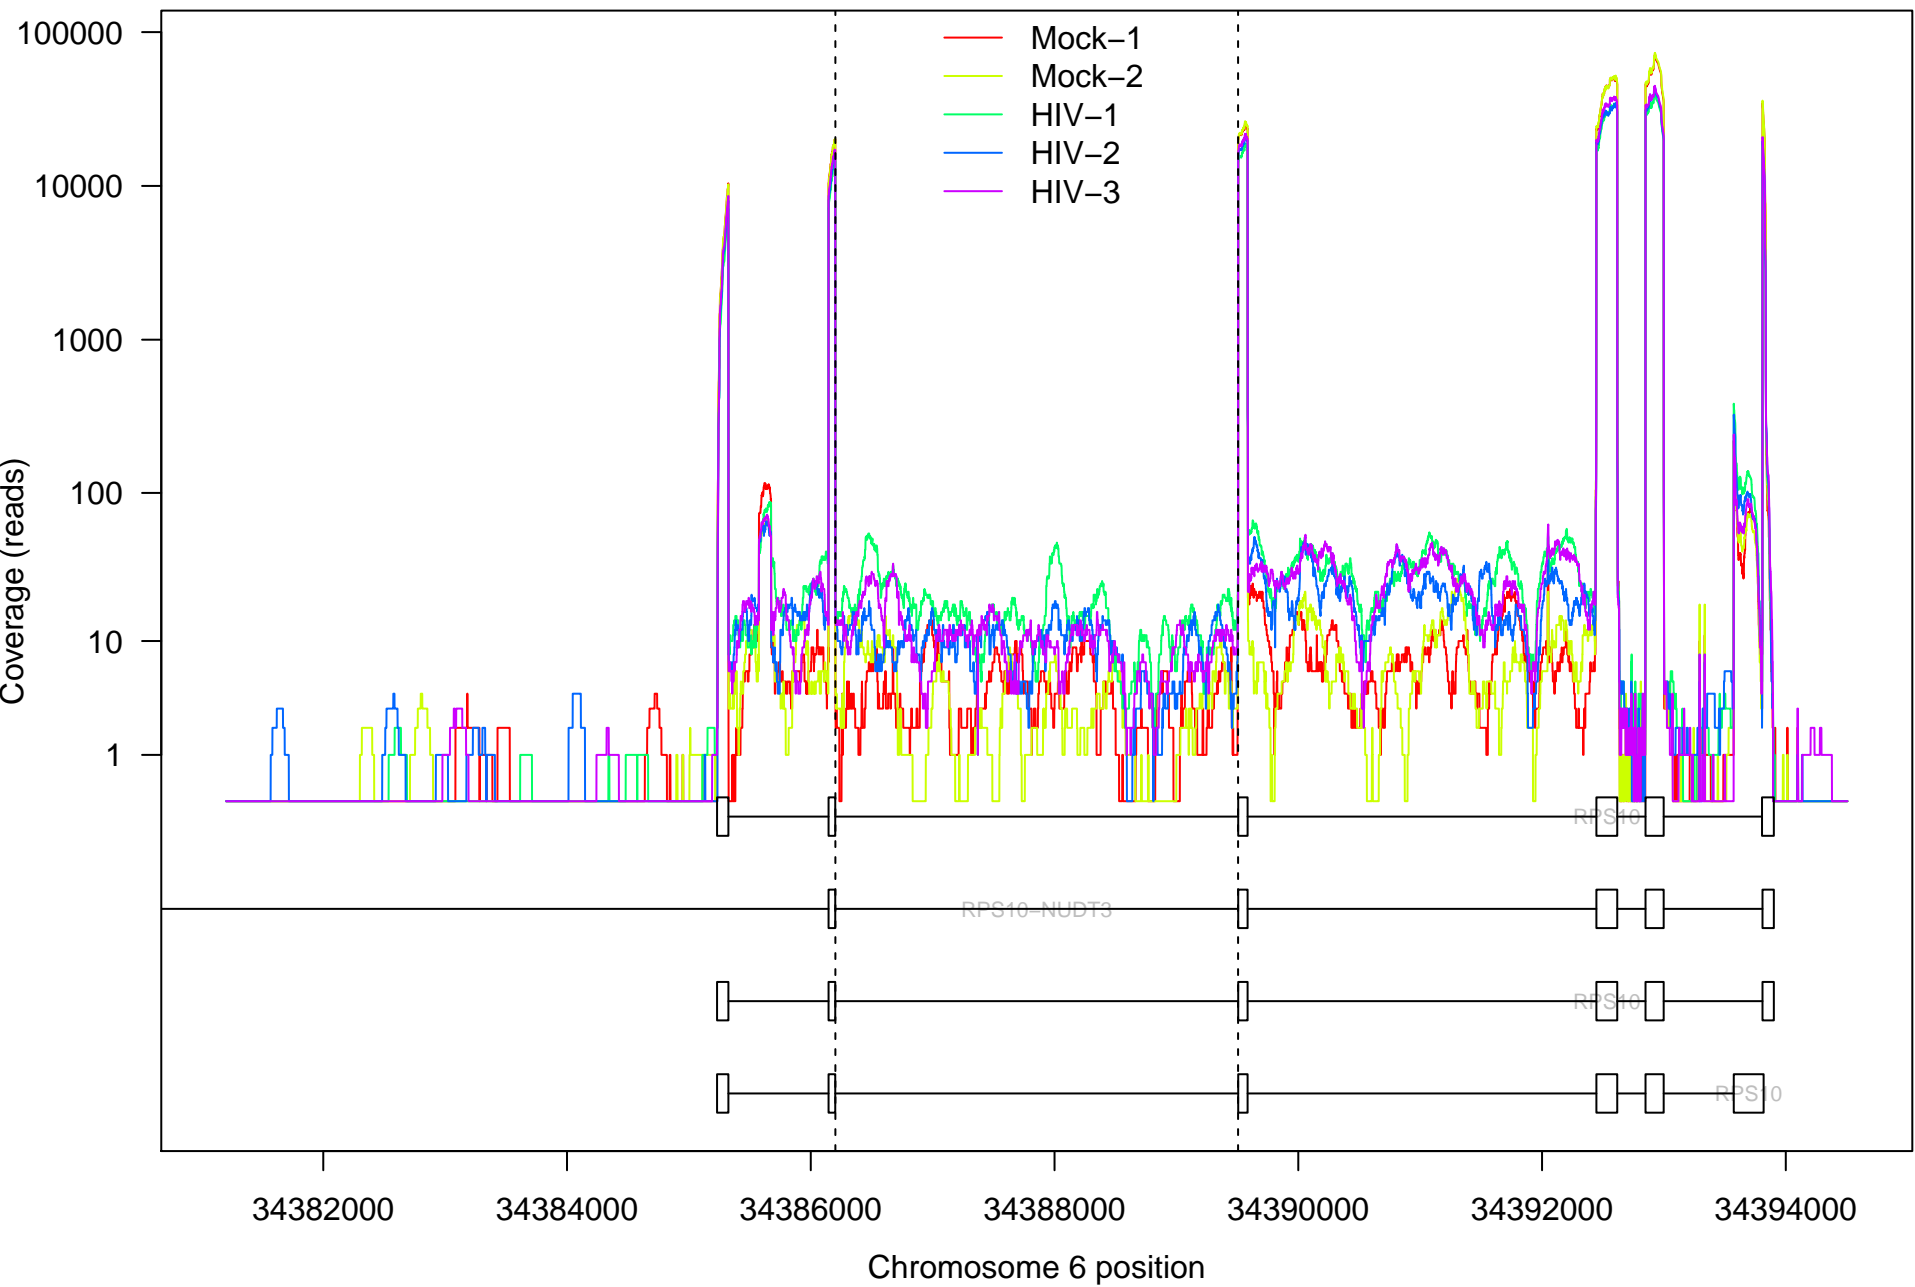

A.21

chr11:75115611-75115715

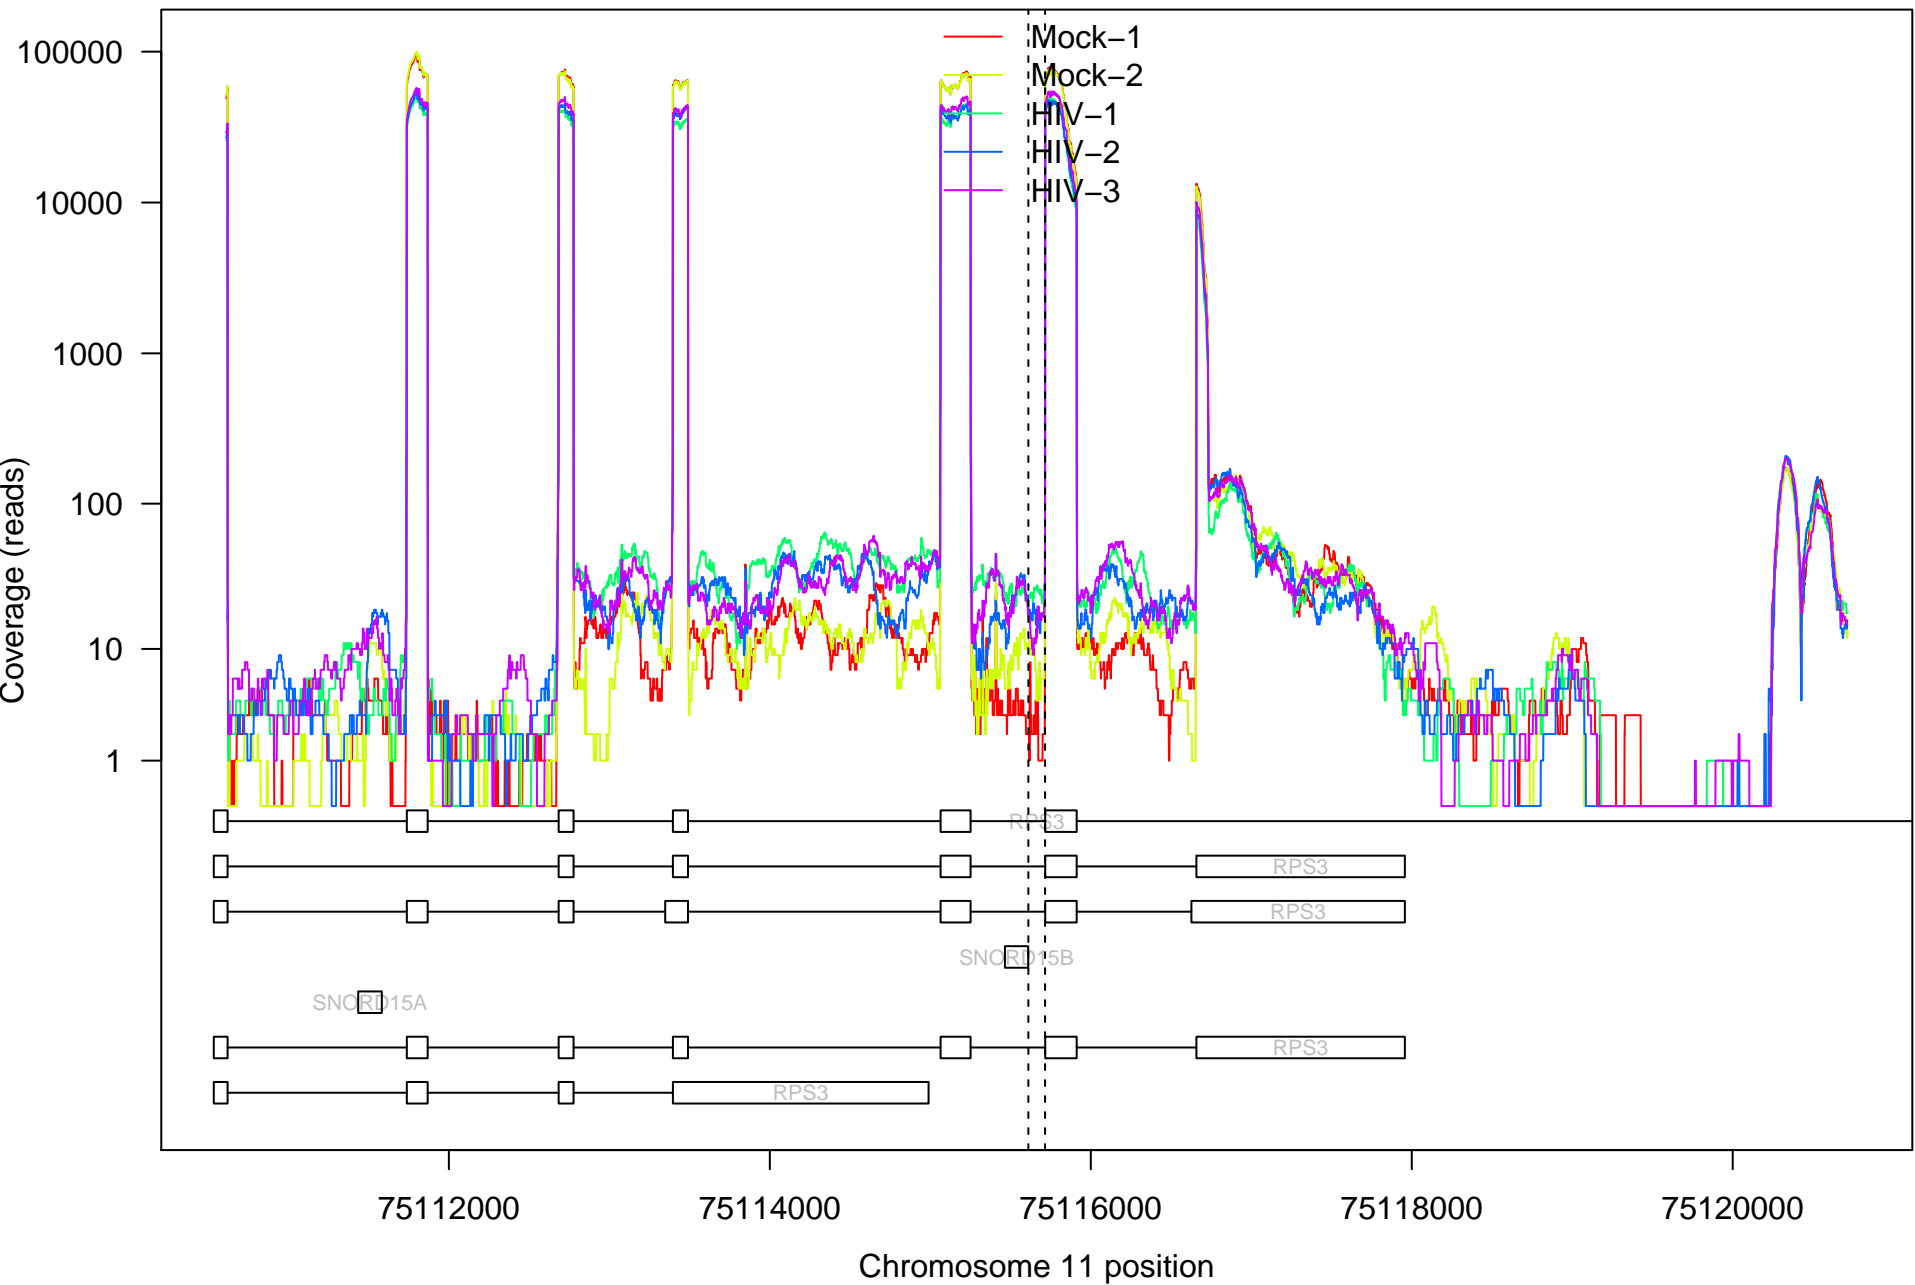

A.22

chr1:45242447-45243285

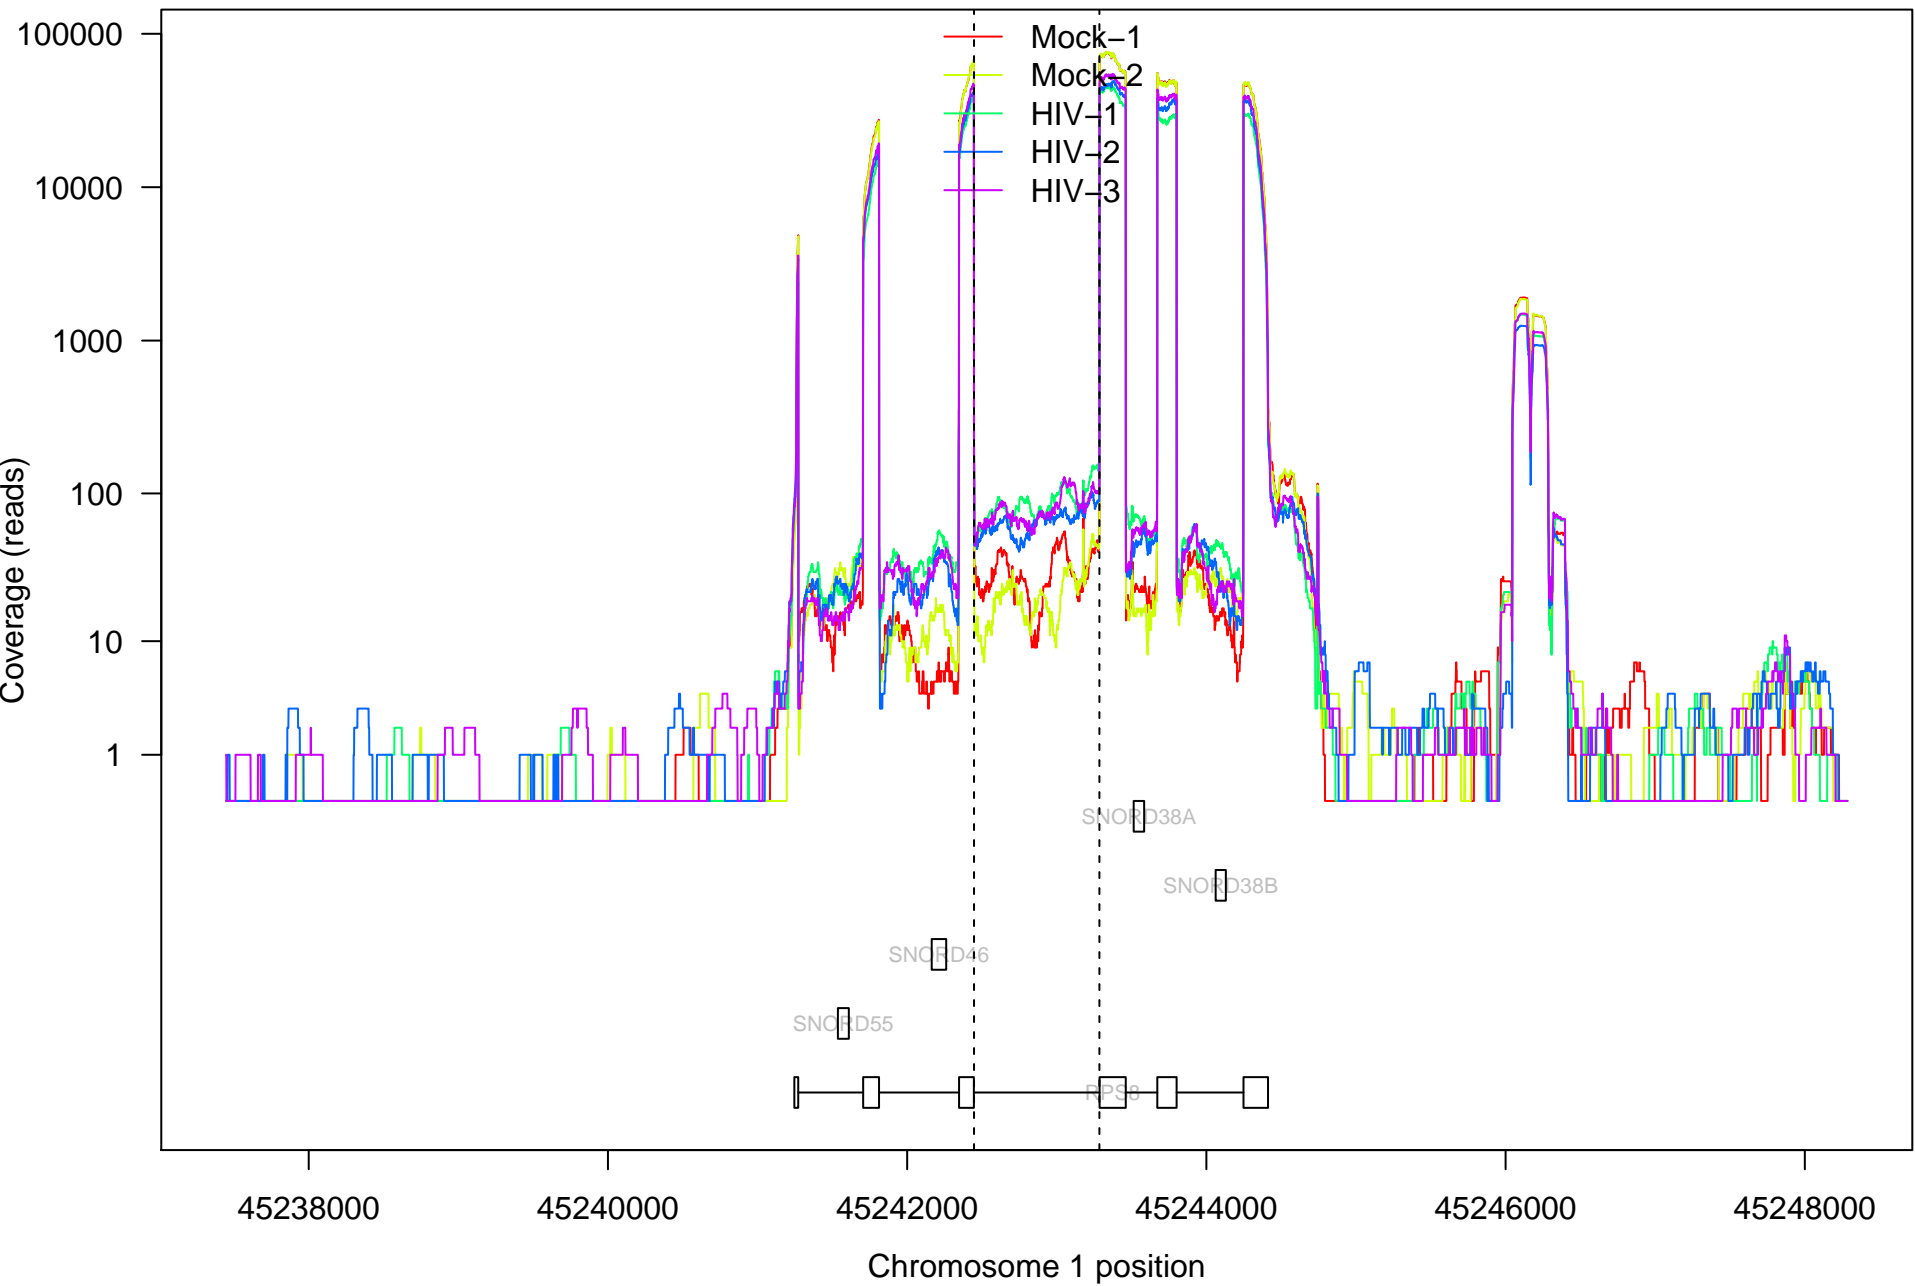

A.23

## chr17:8281011-8283113

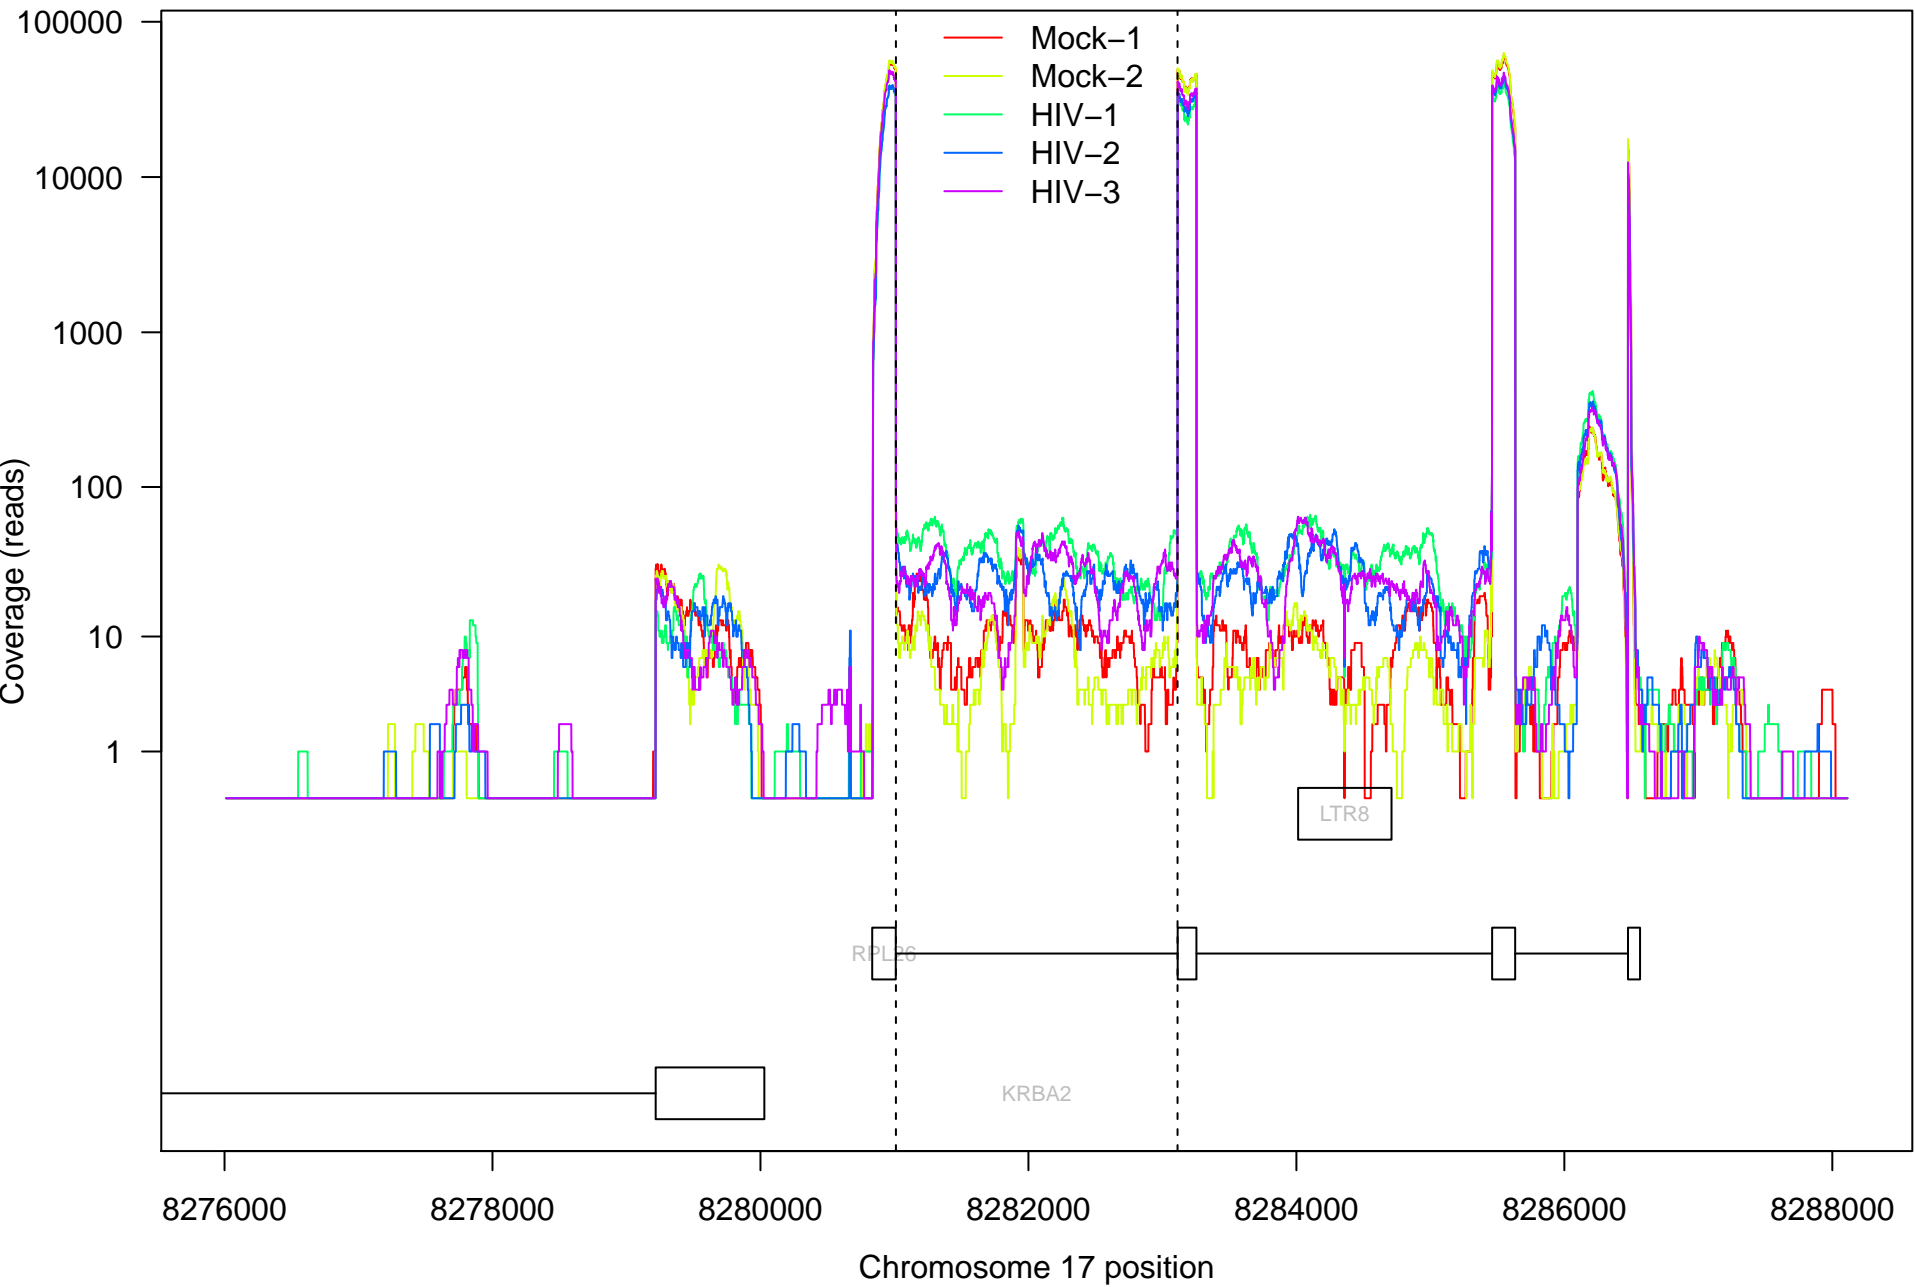

A.24

chr17:41150489-41150765

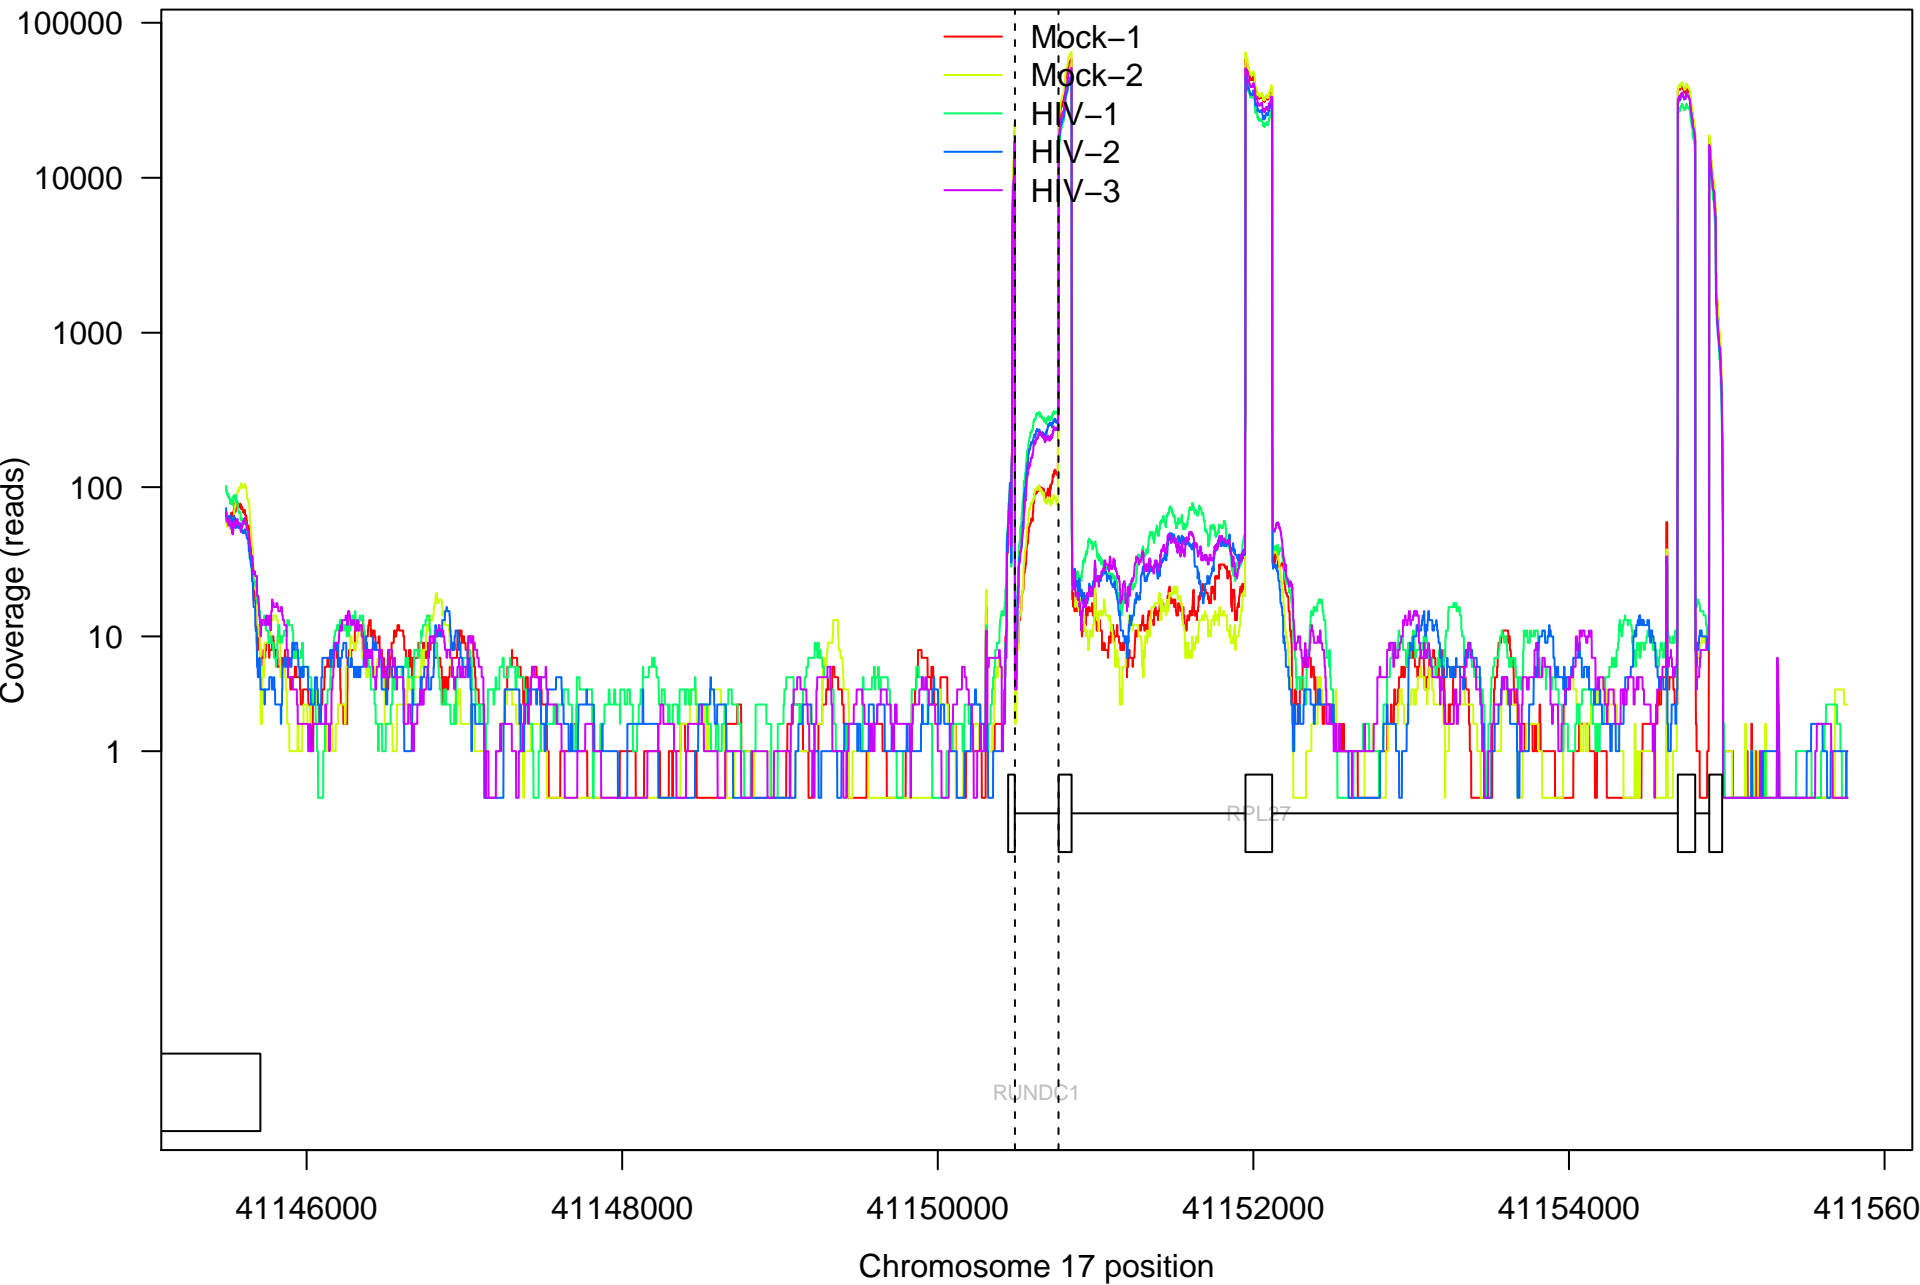



A.25

## chr13:27829664–27830320

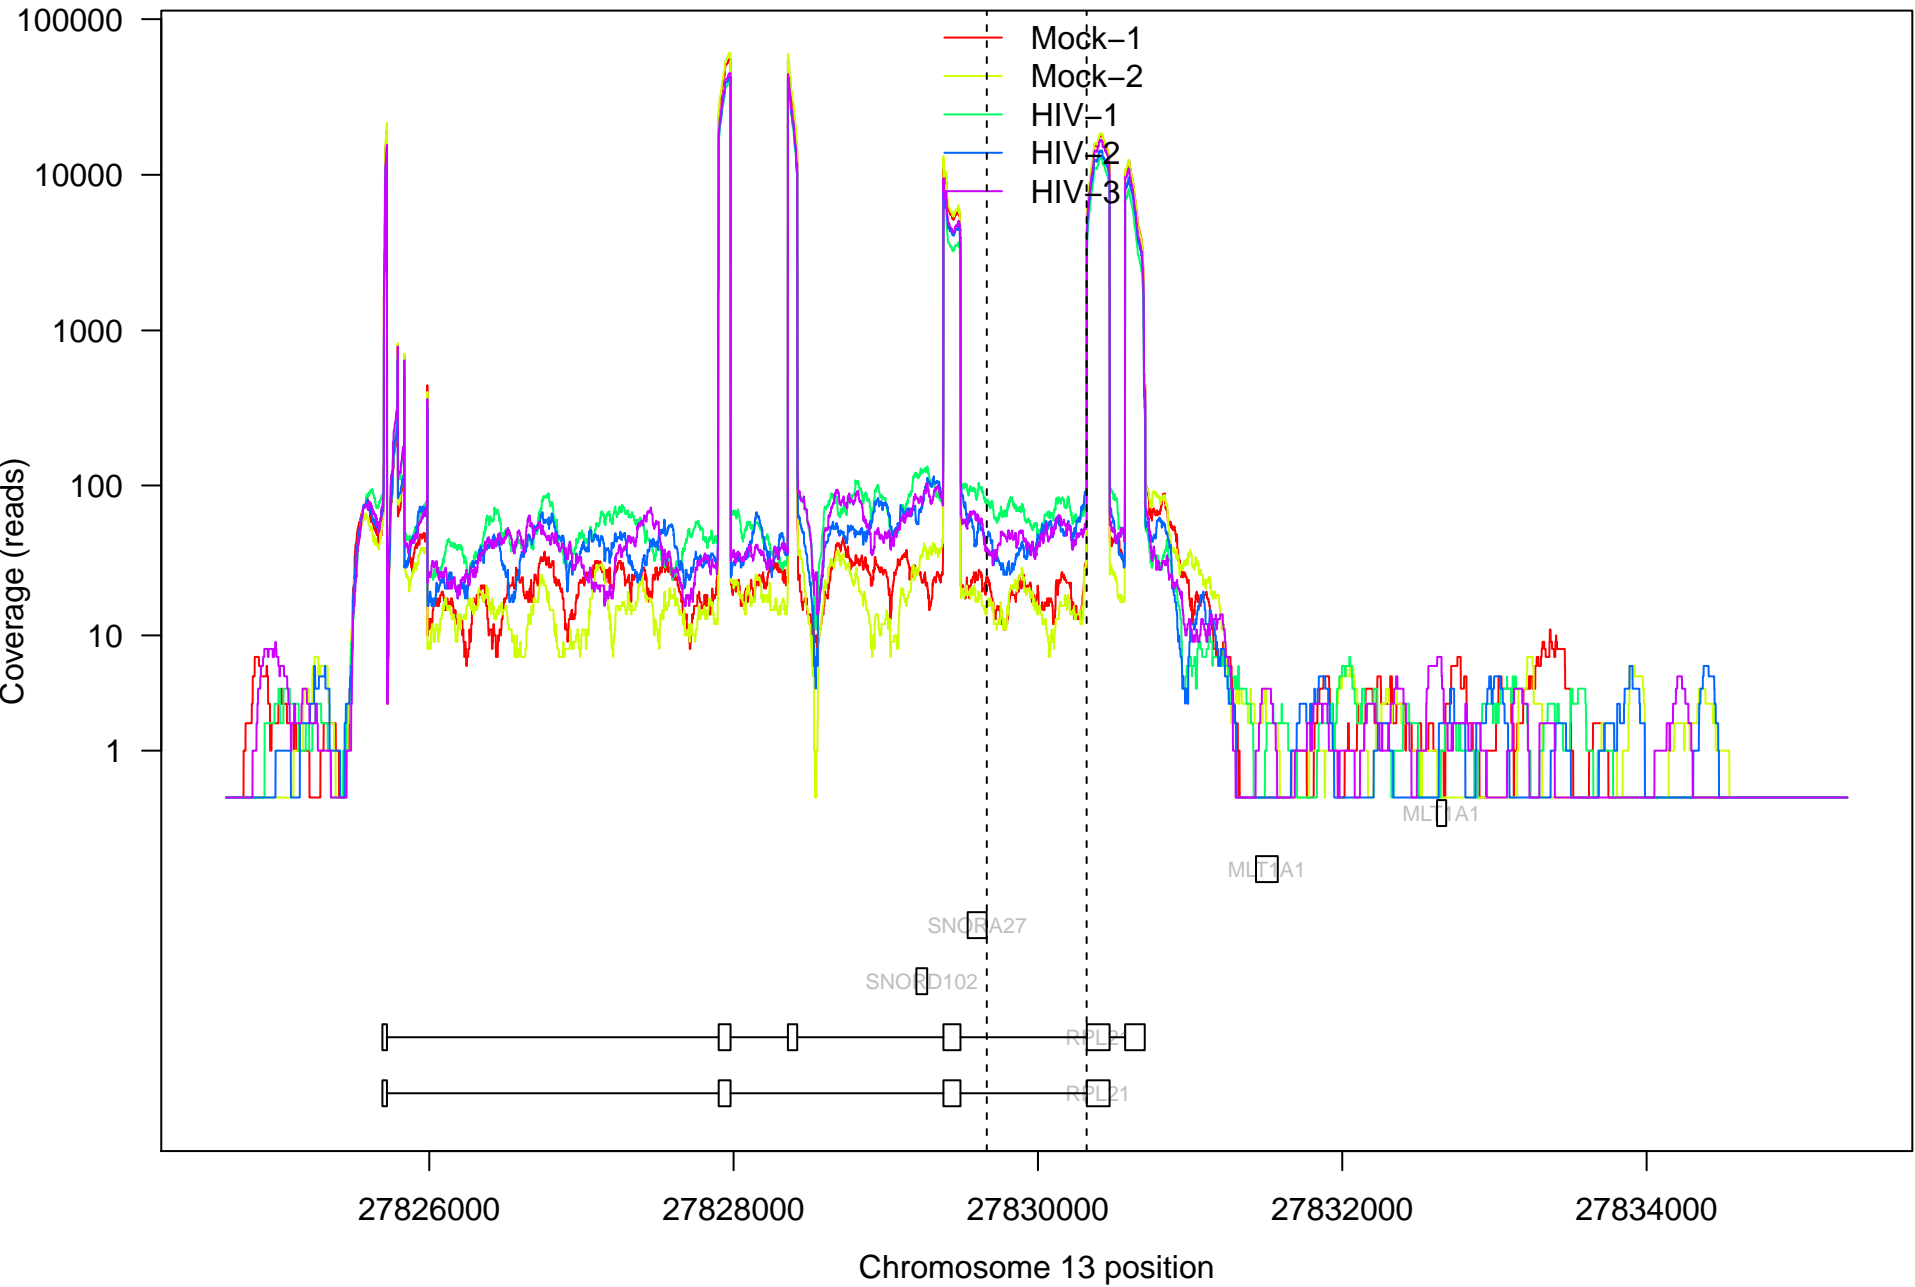

A.26

chr15:66795249–66795395

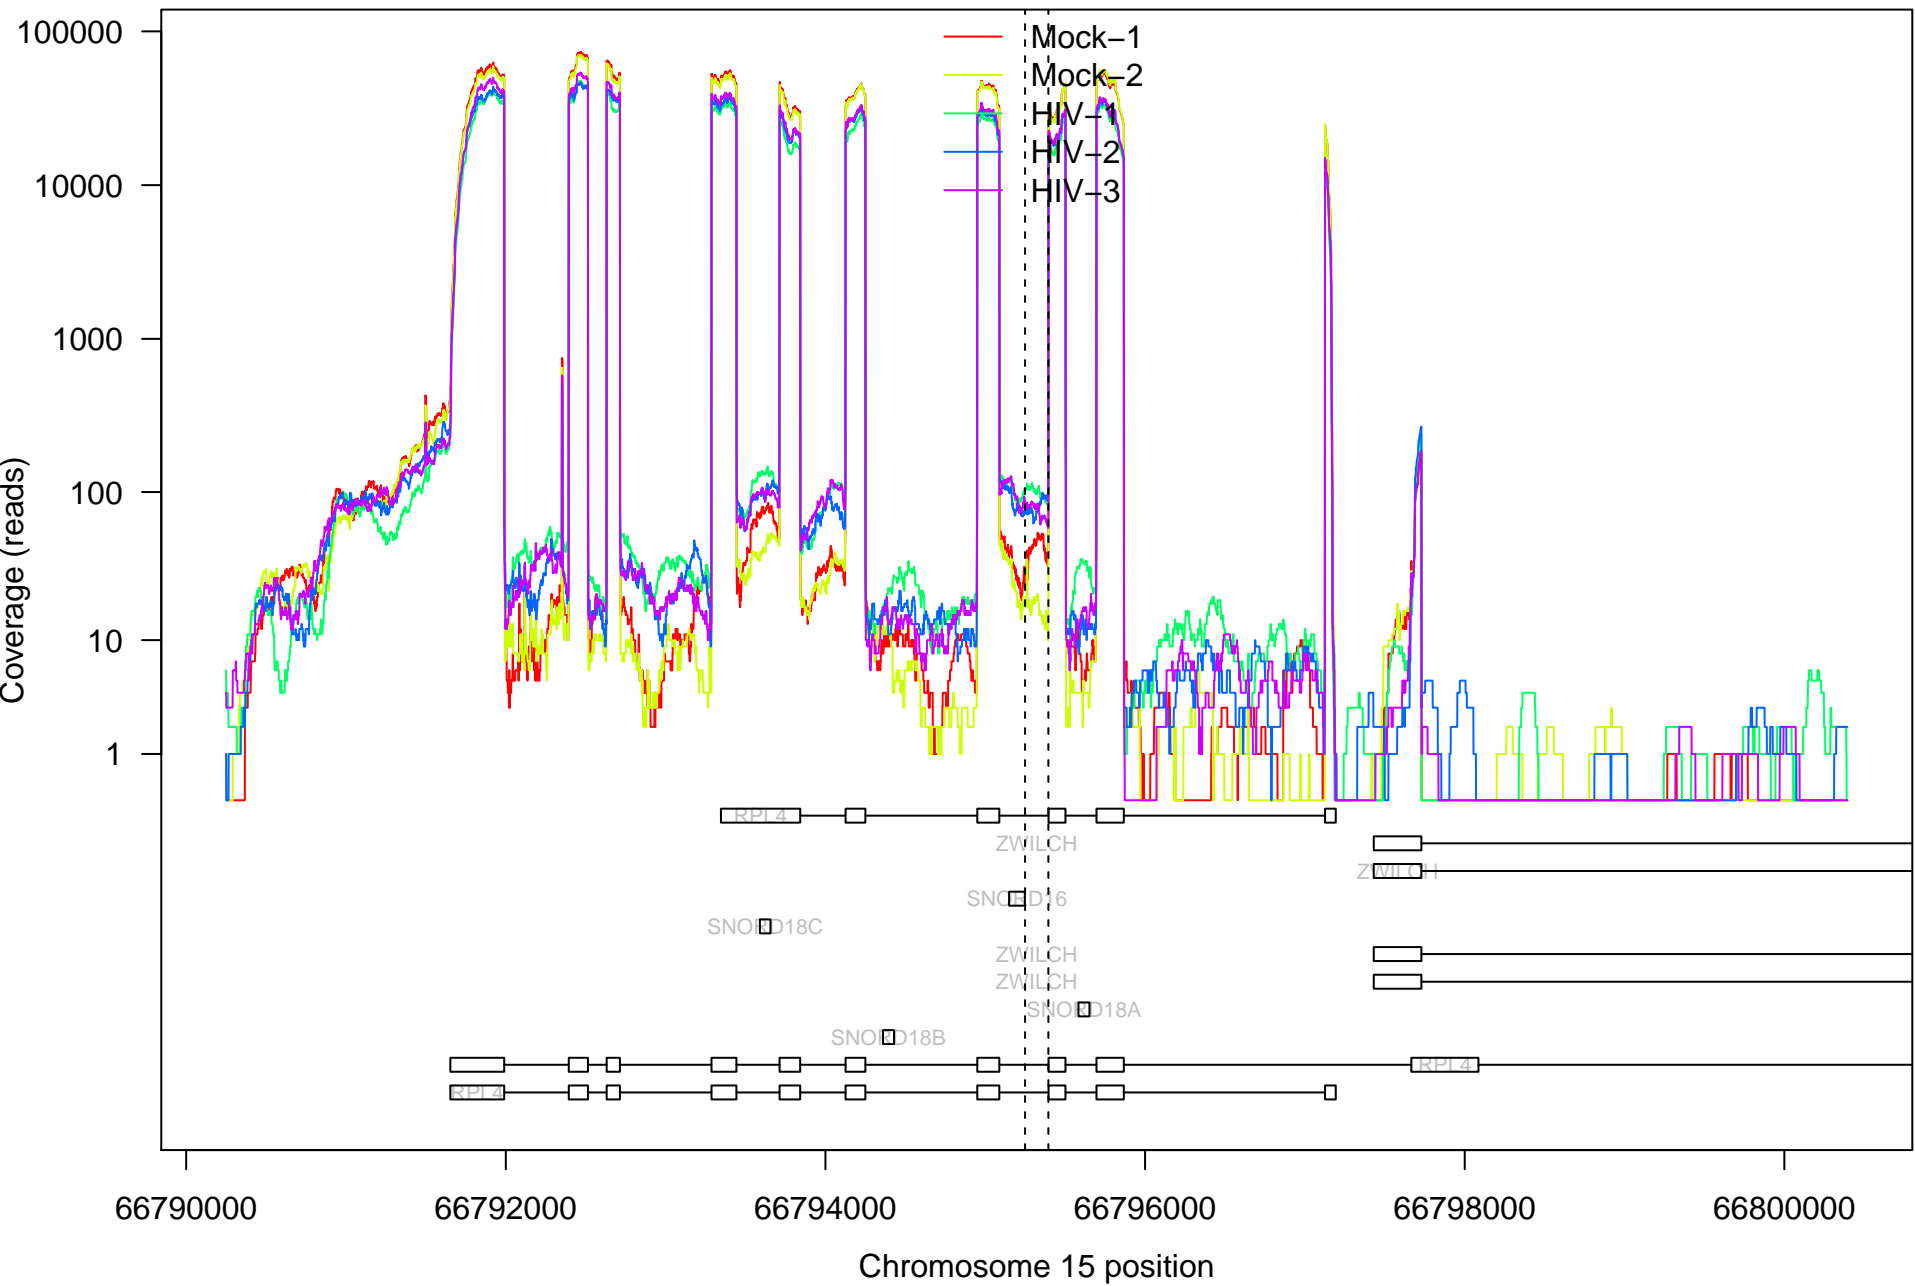

A.27

chr16:18800441-18801565

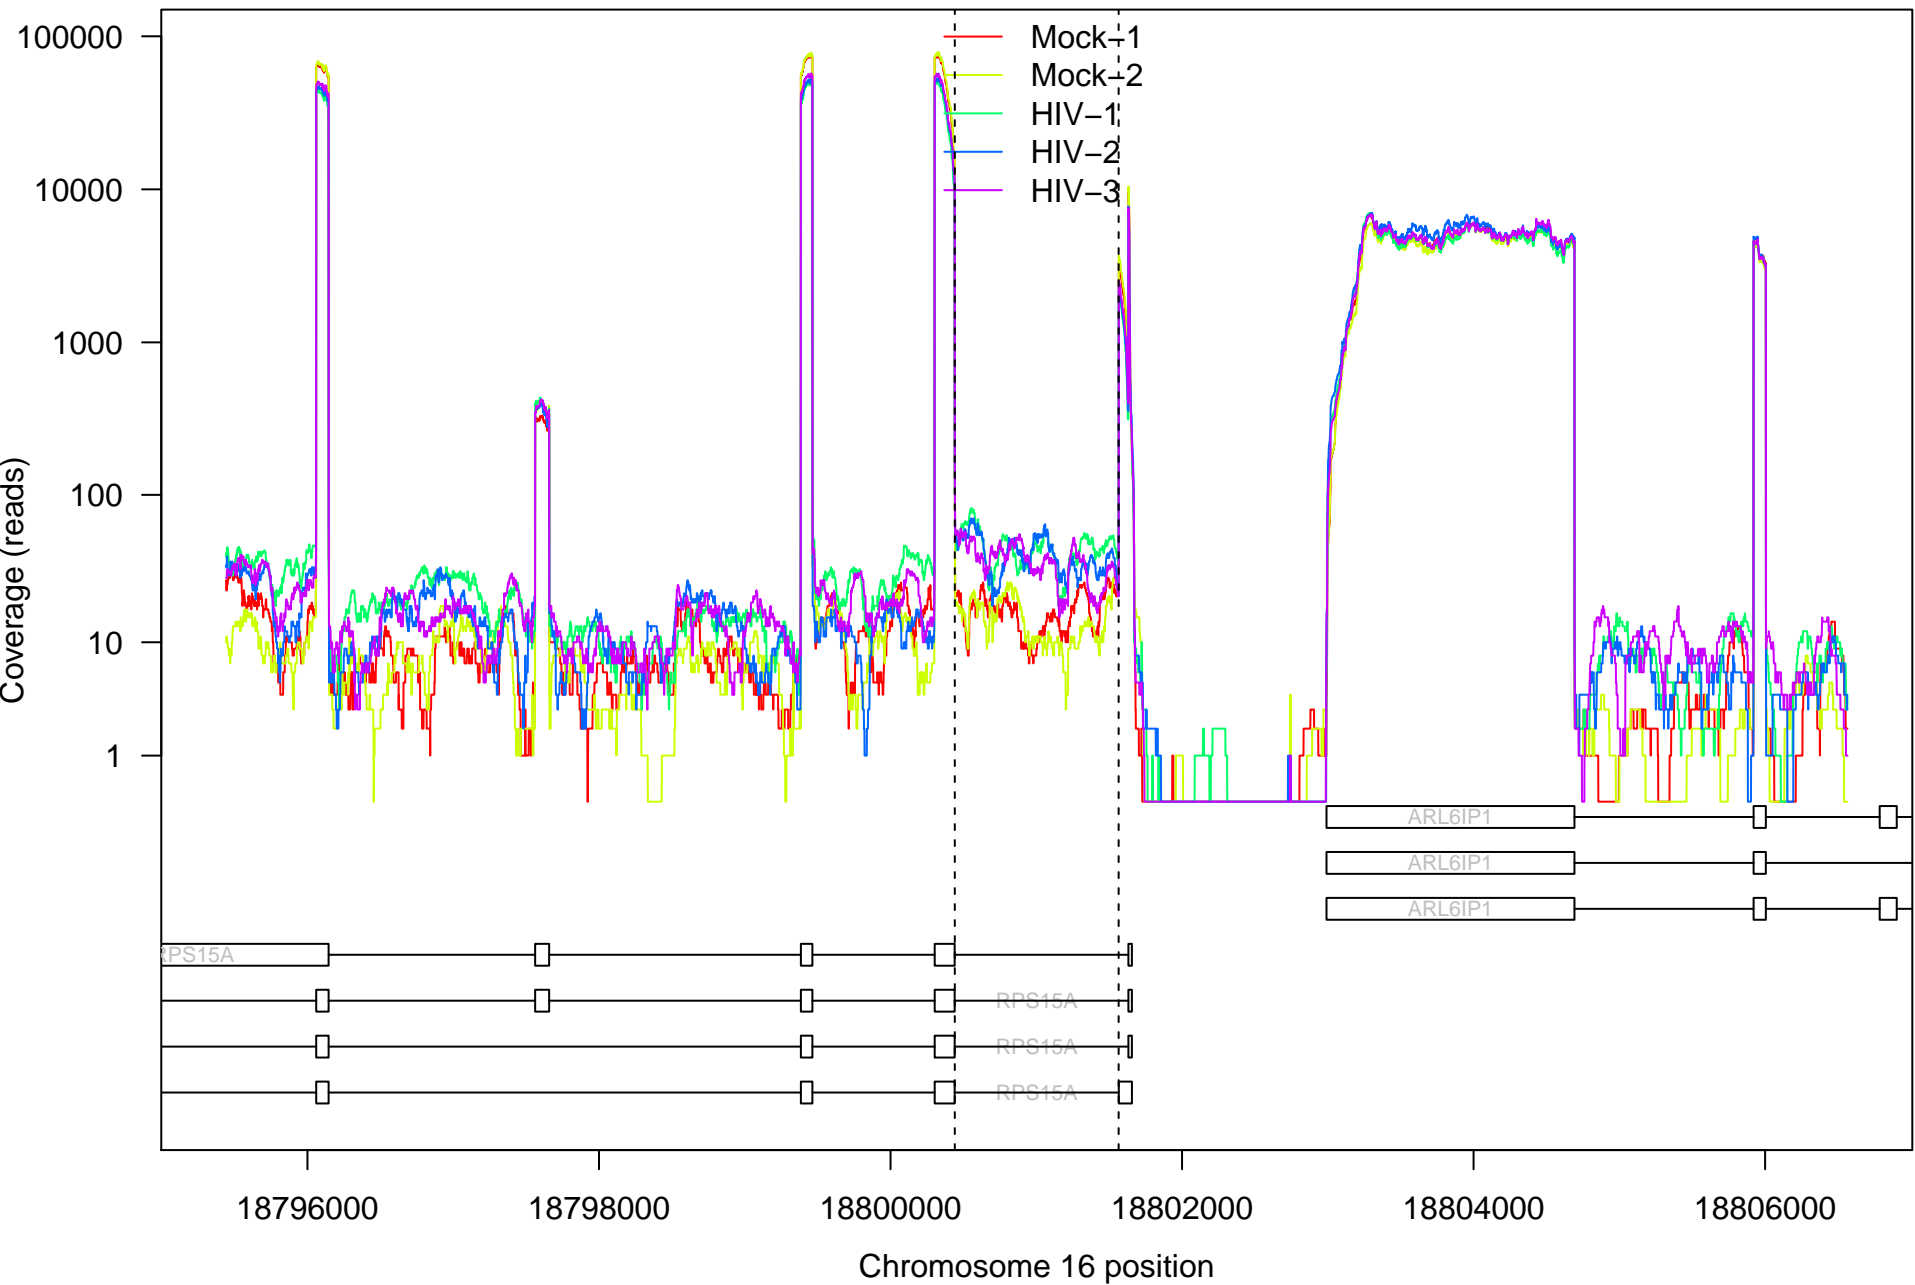

A.28

chr4:109541869-109543106

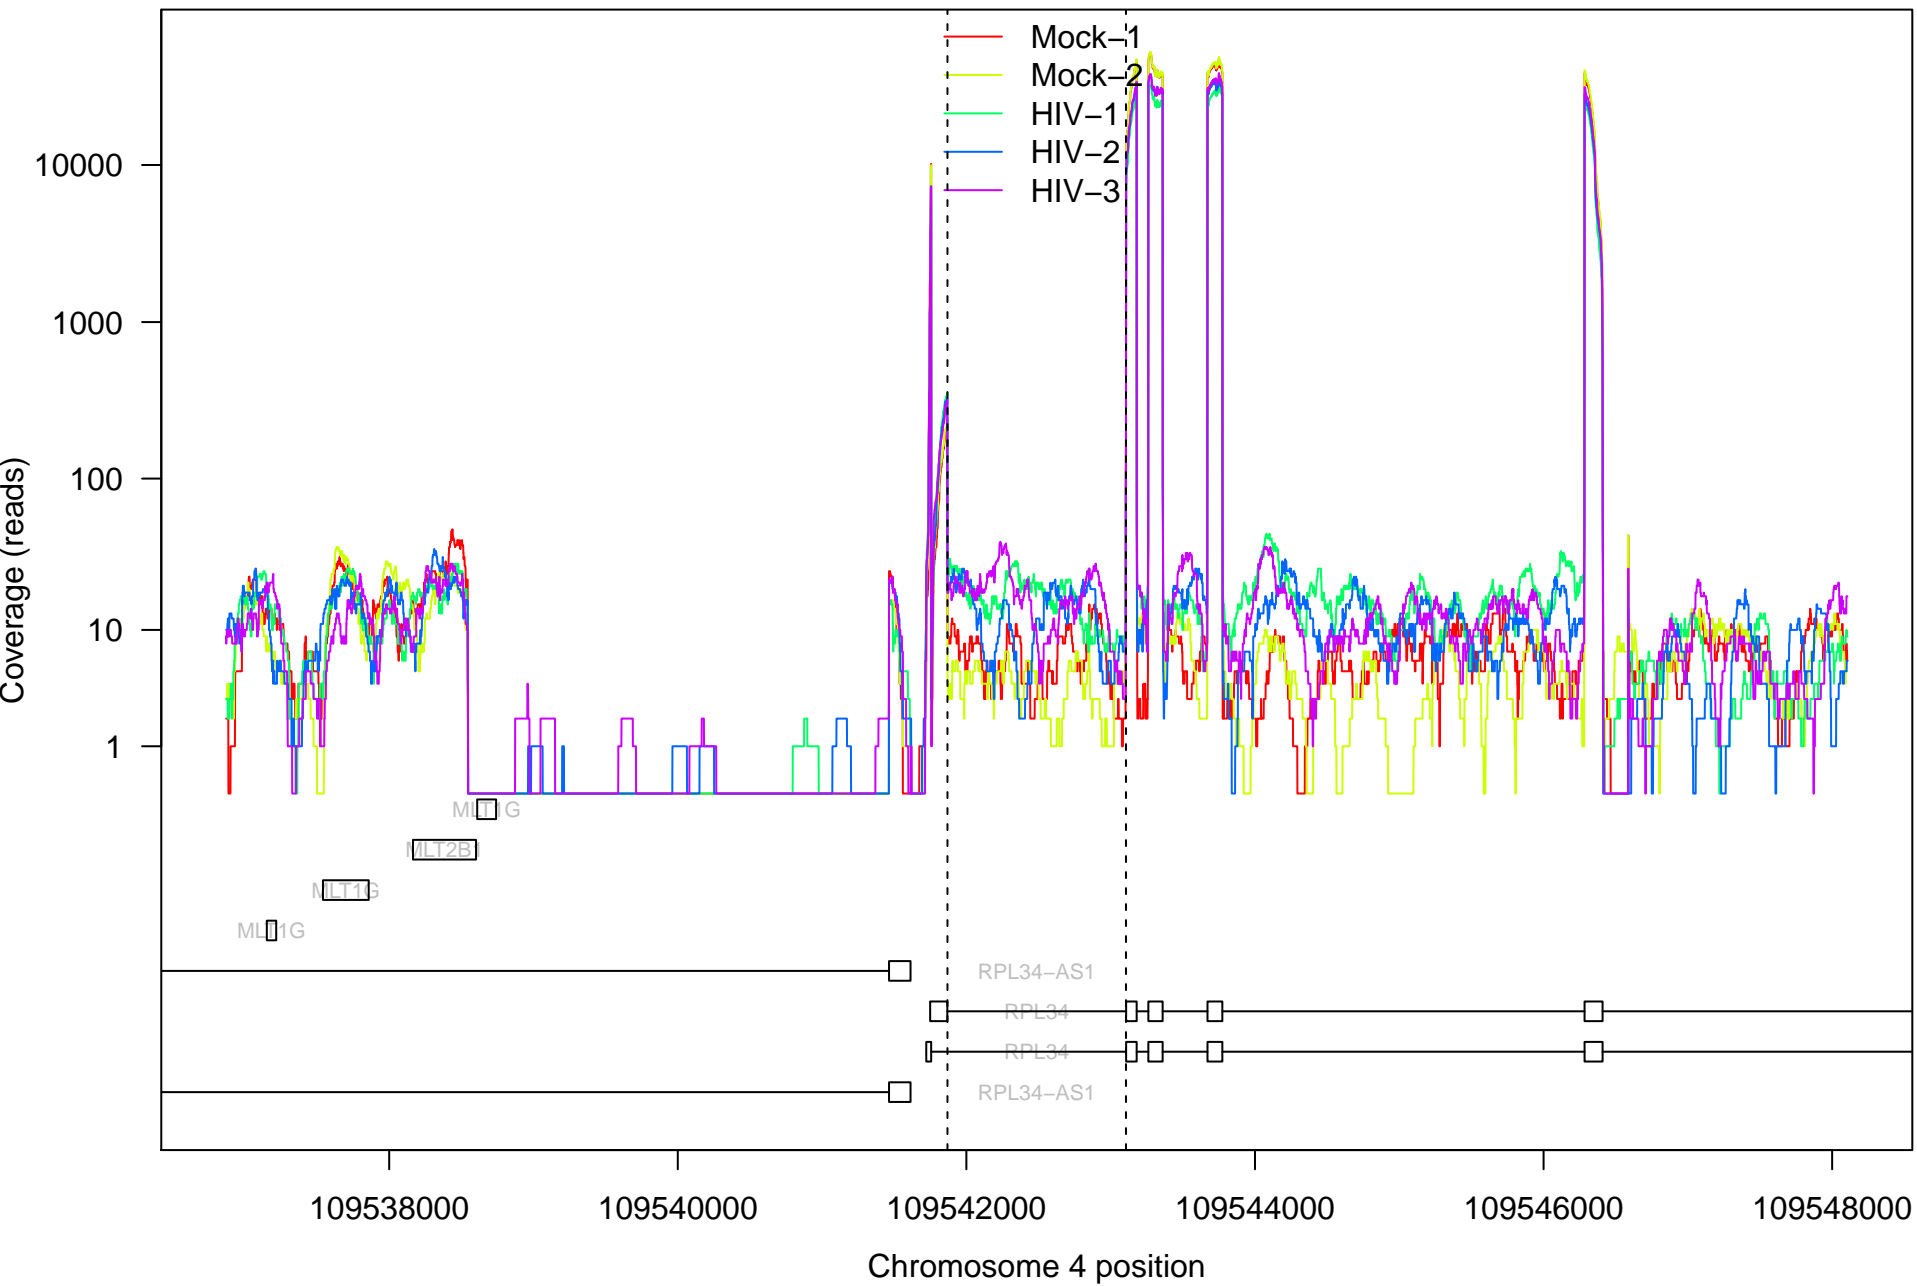

A.29

chr4:109543775–109546283

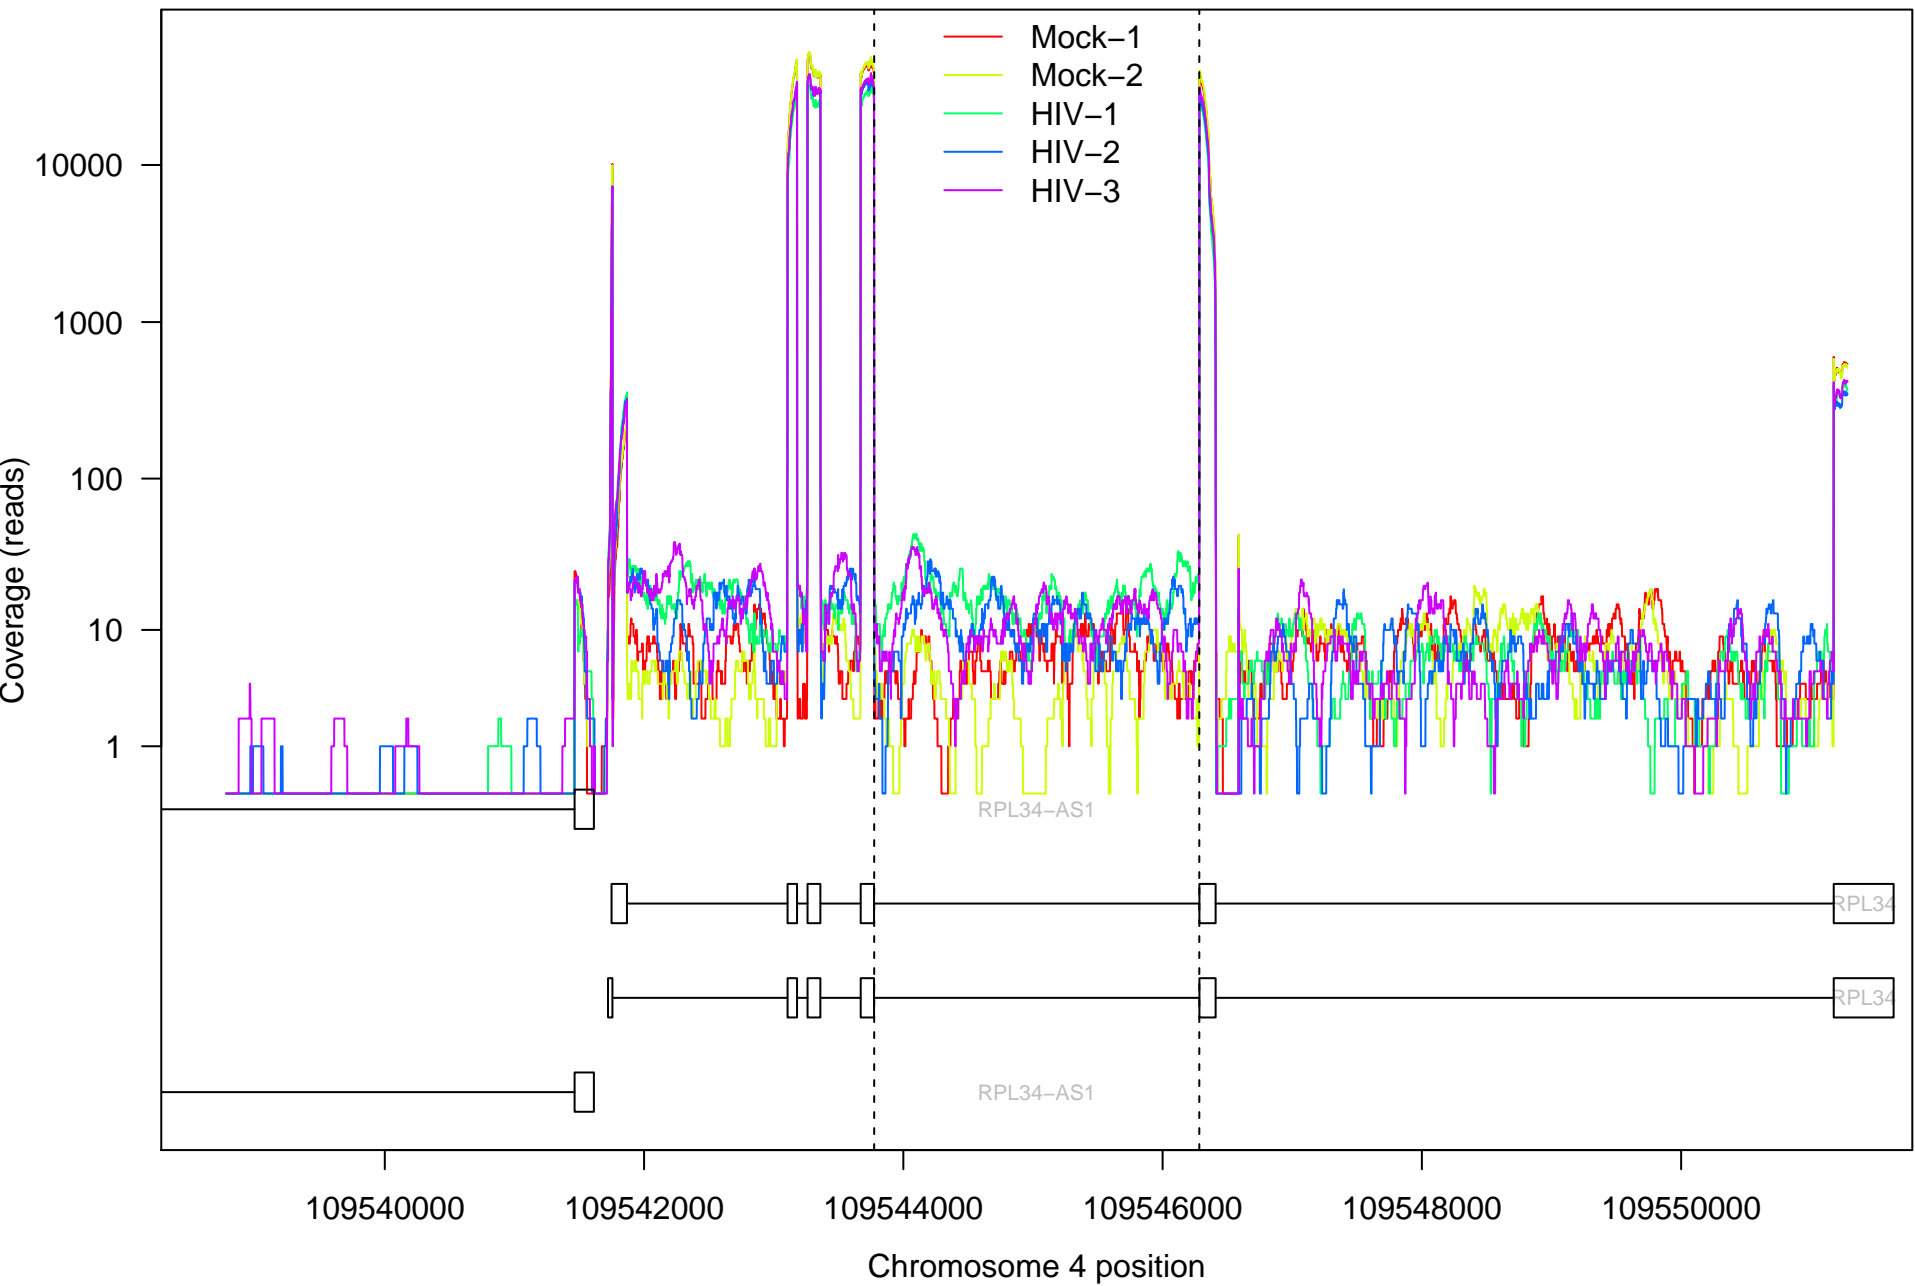

A.30

chr5:149825249-149826364

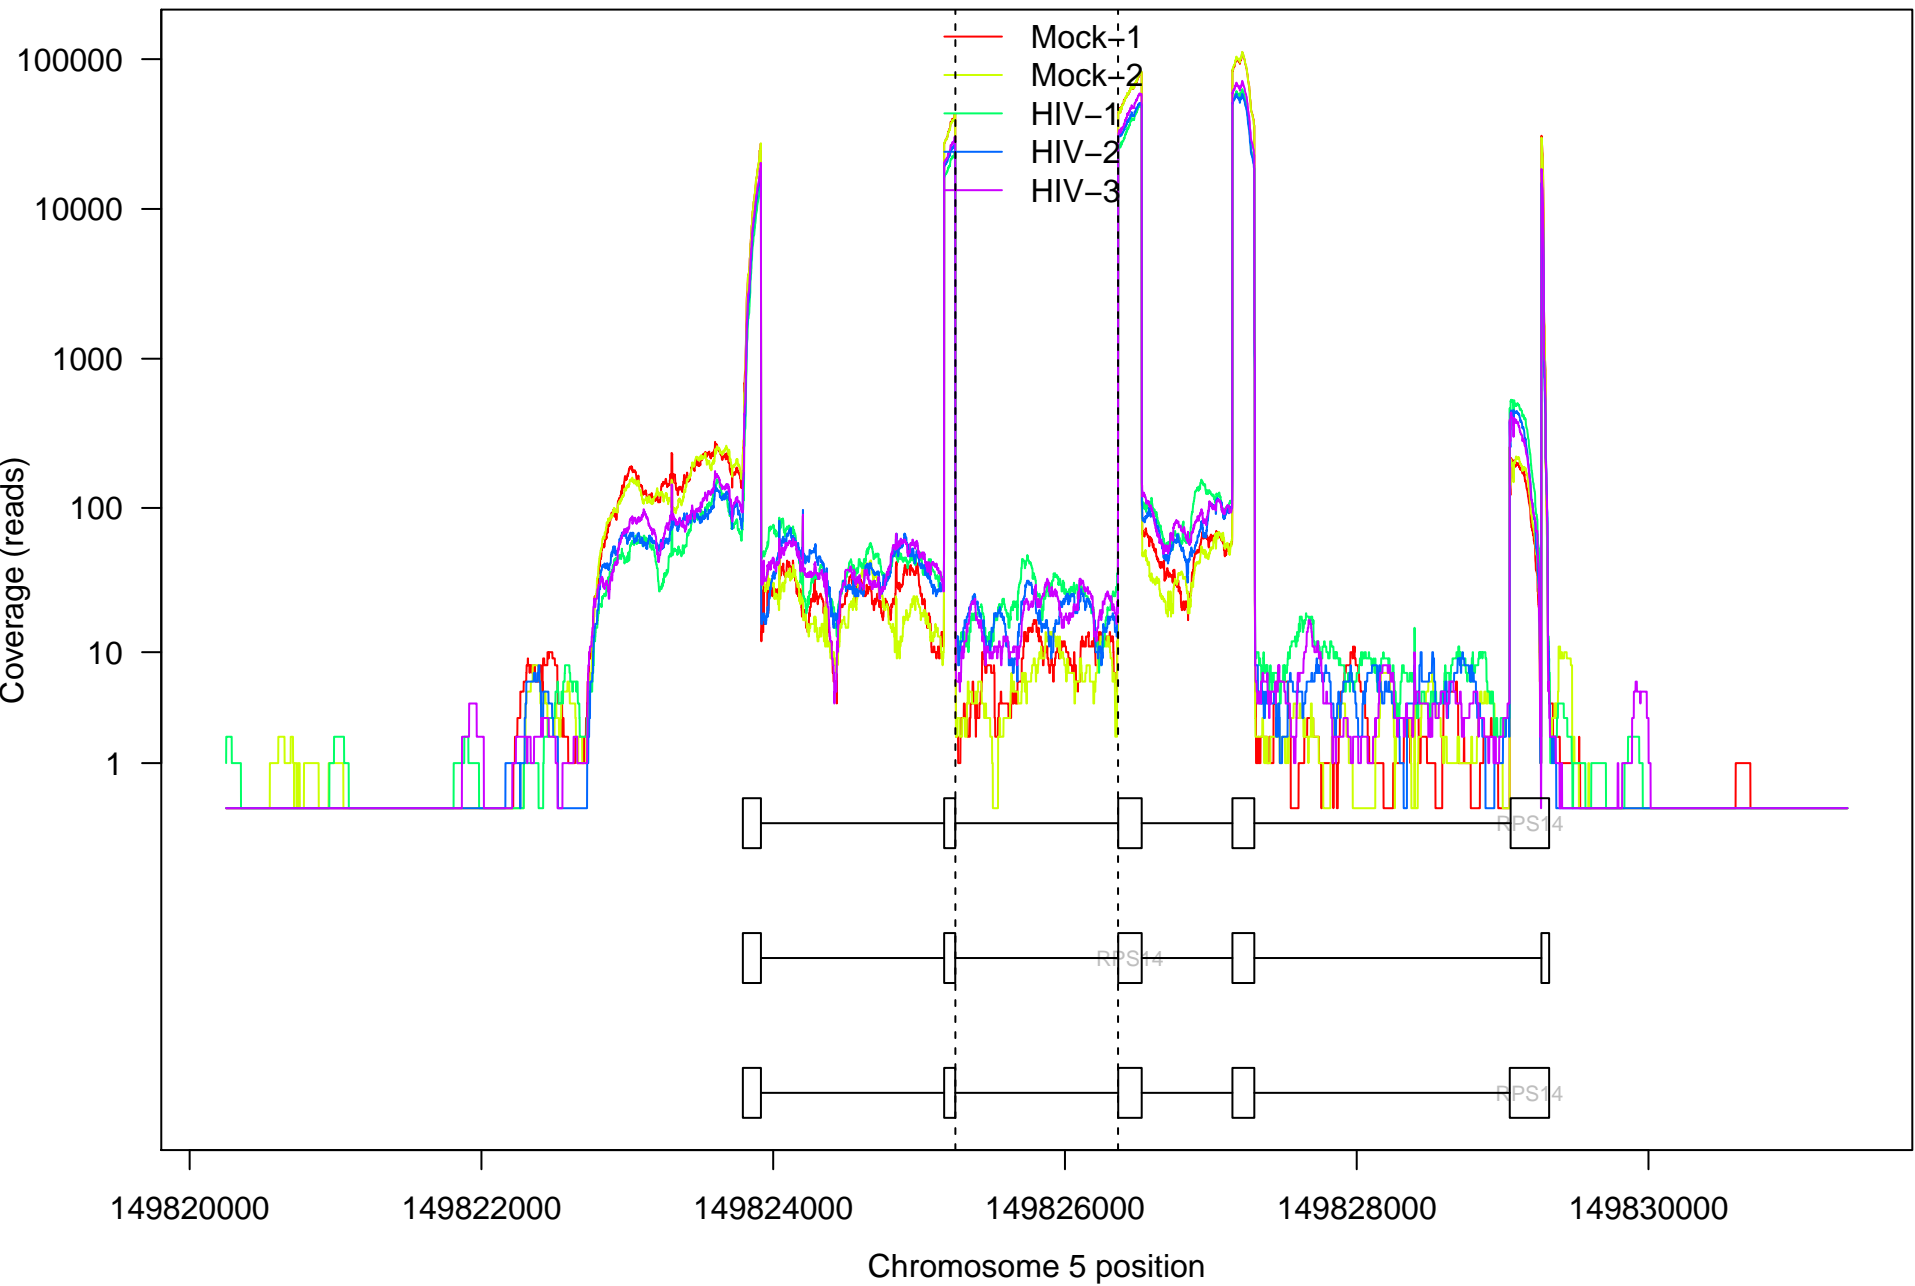

A.31

chr3:12877723-12880847

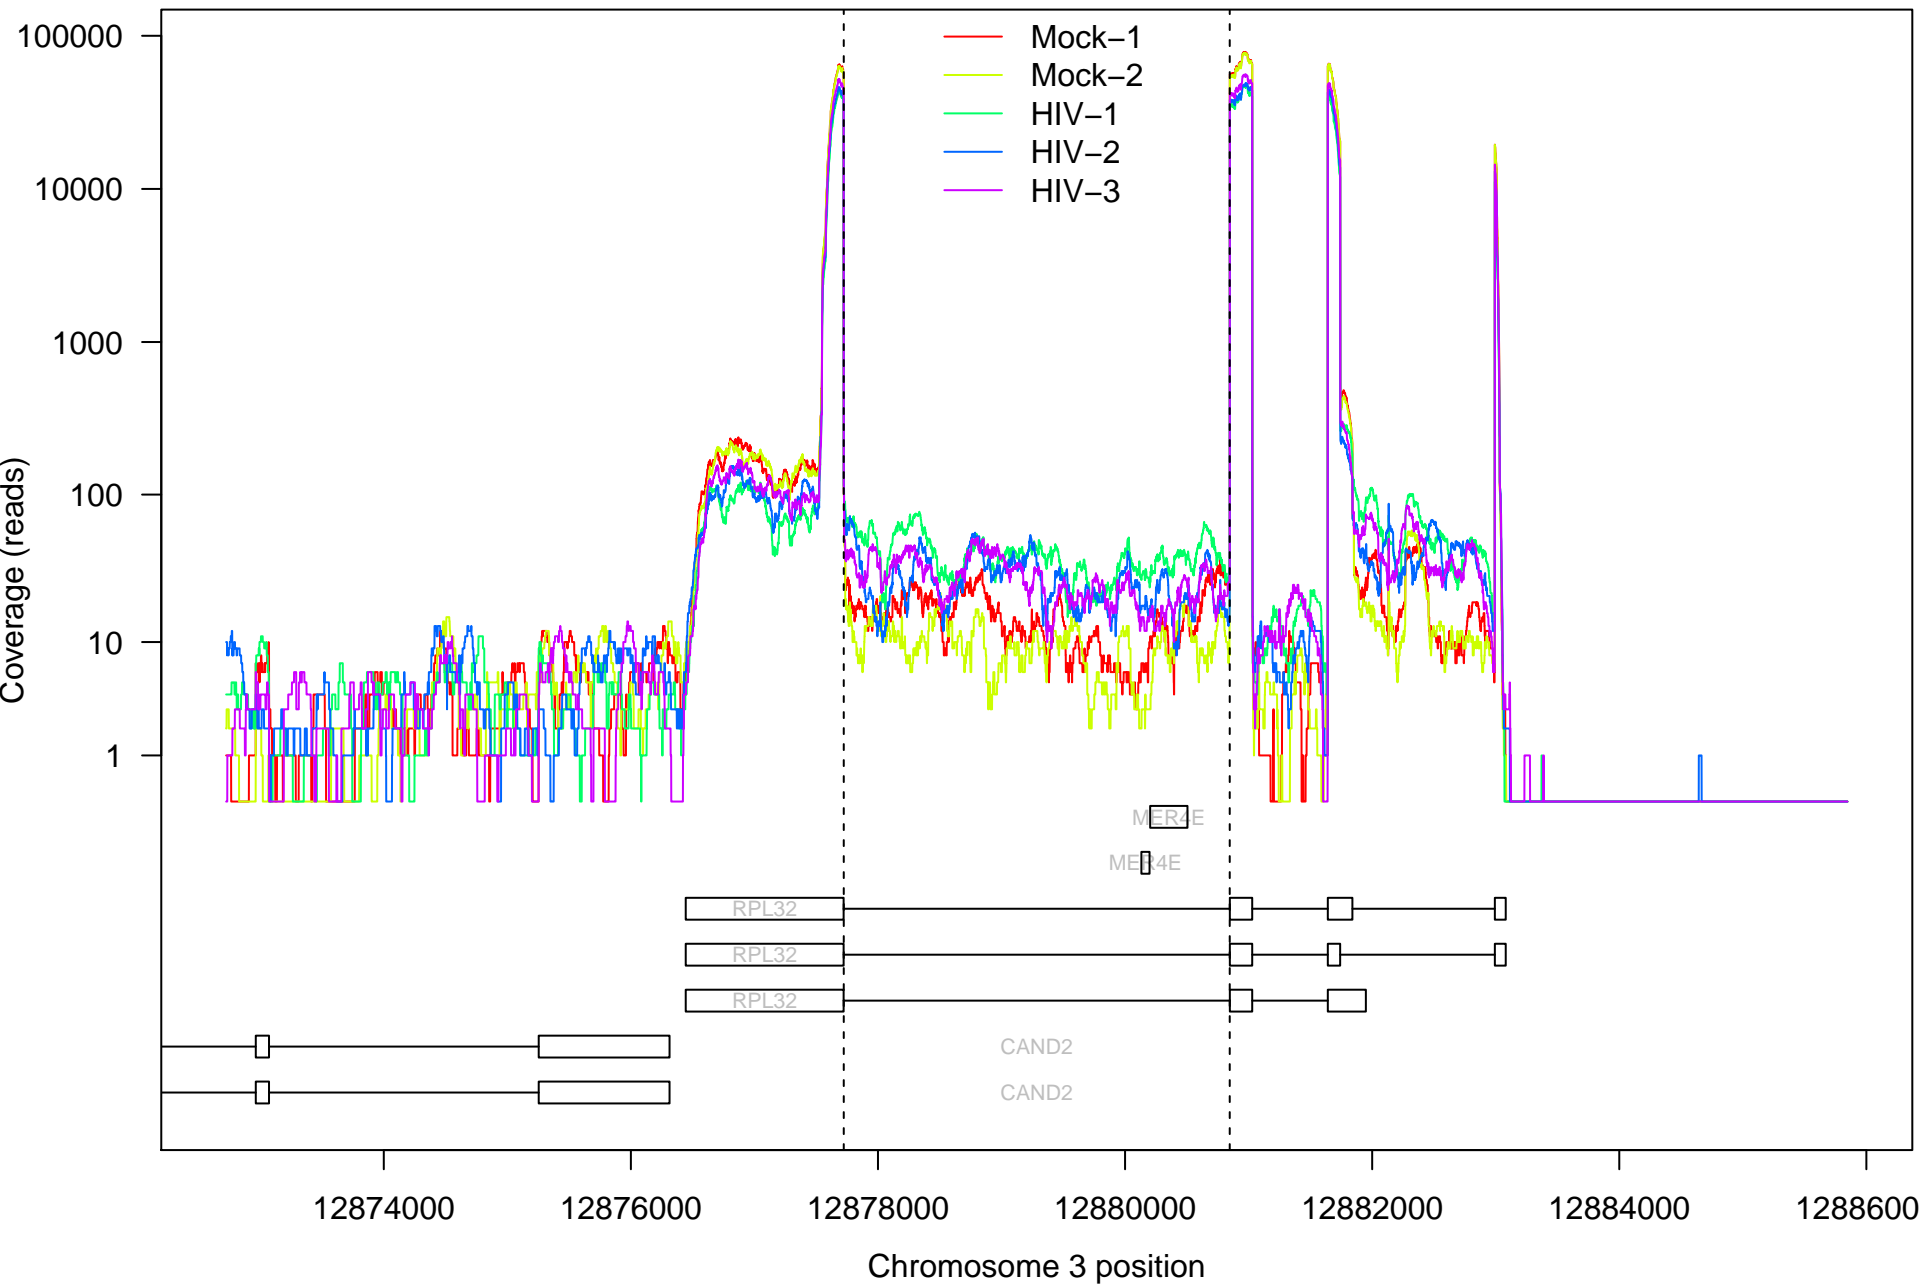

# A.32 chr11:810358–811596

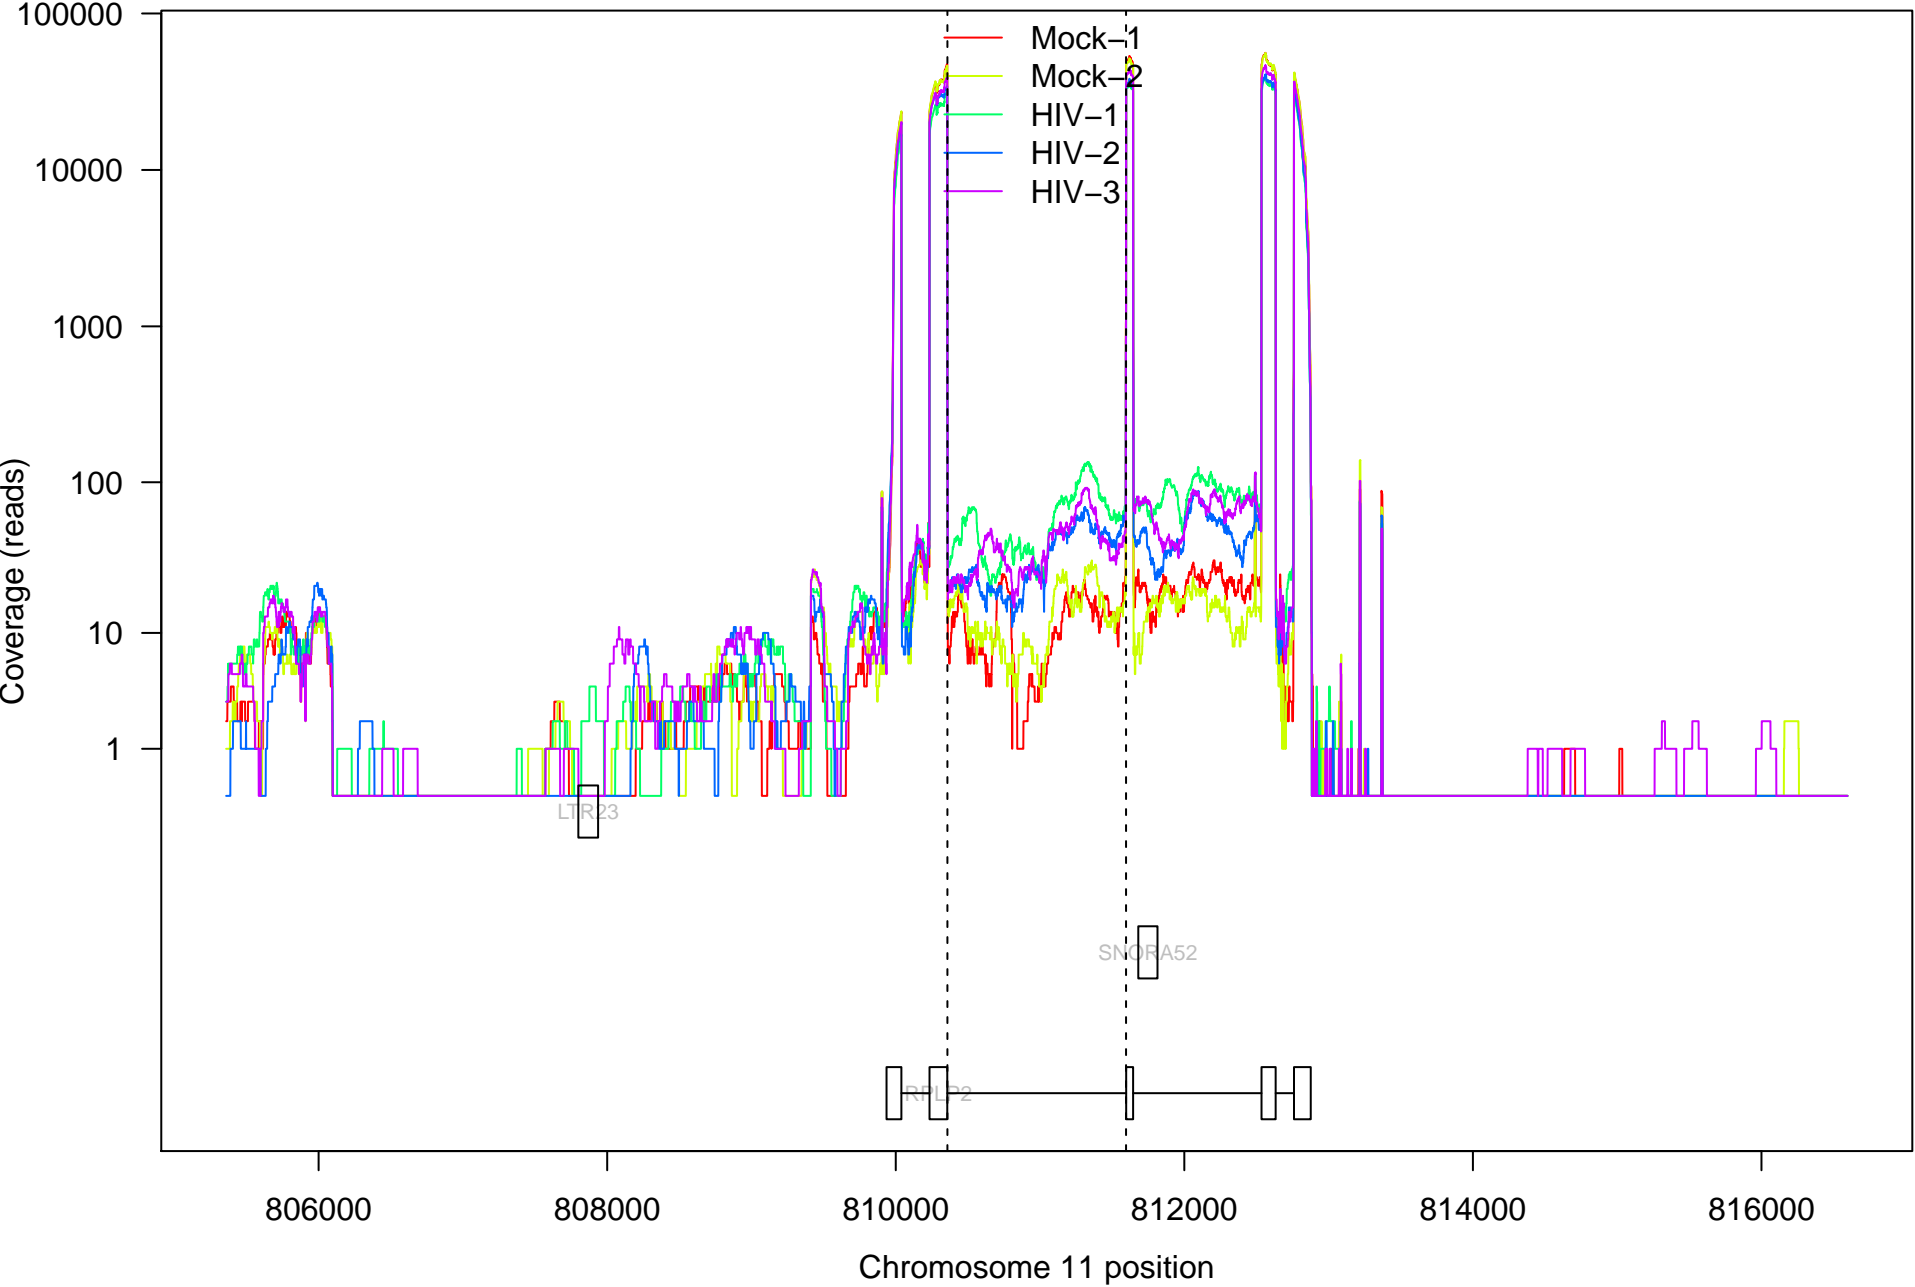



A.33

chr3:39449278-39449881

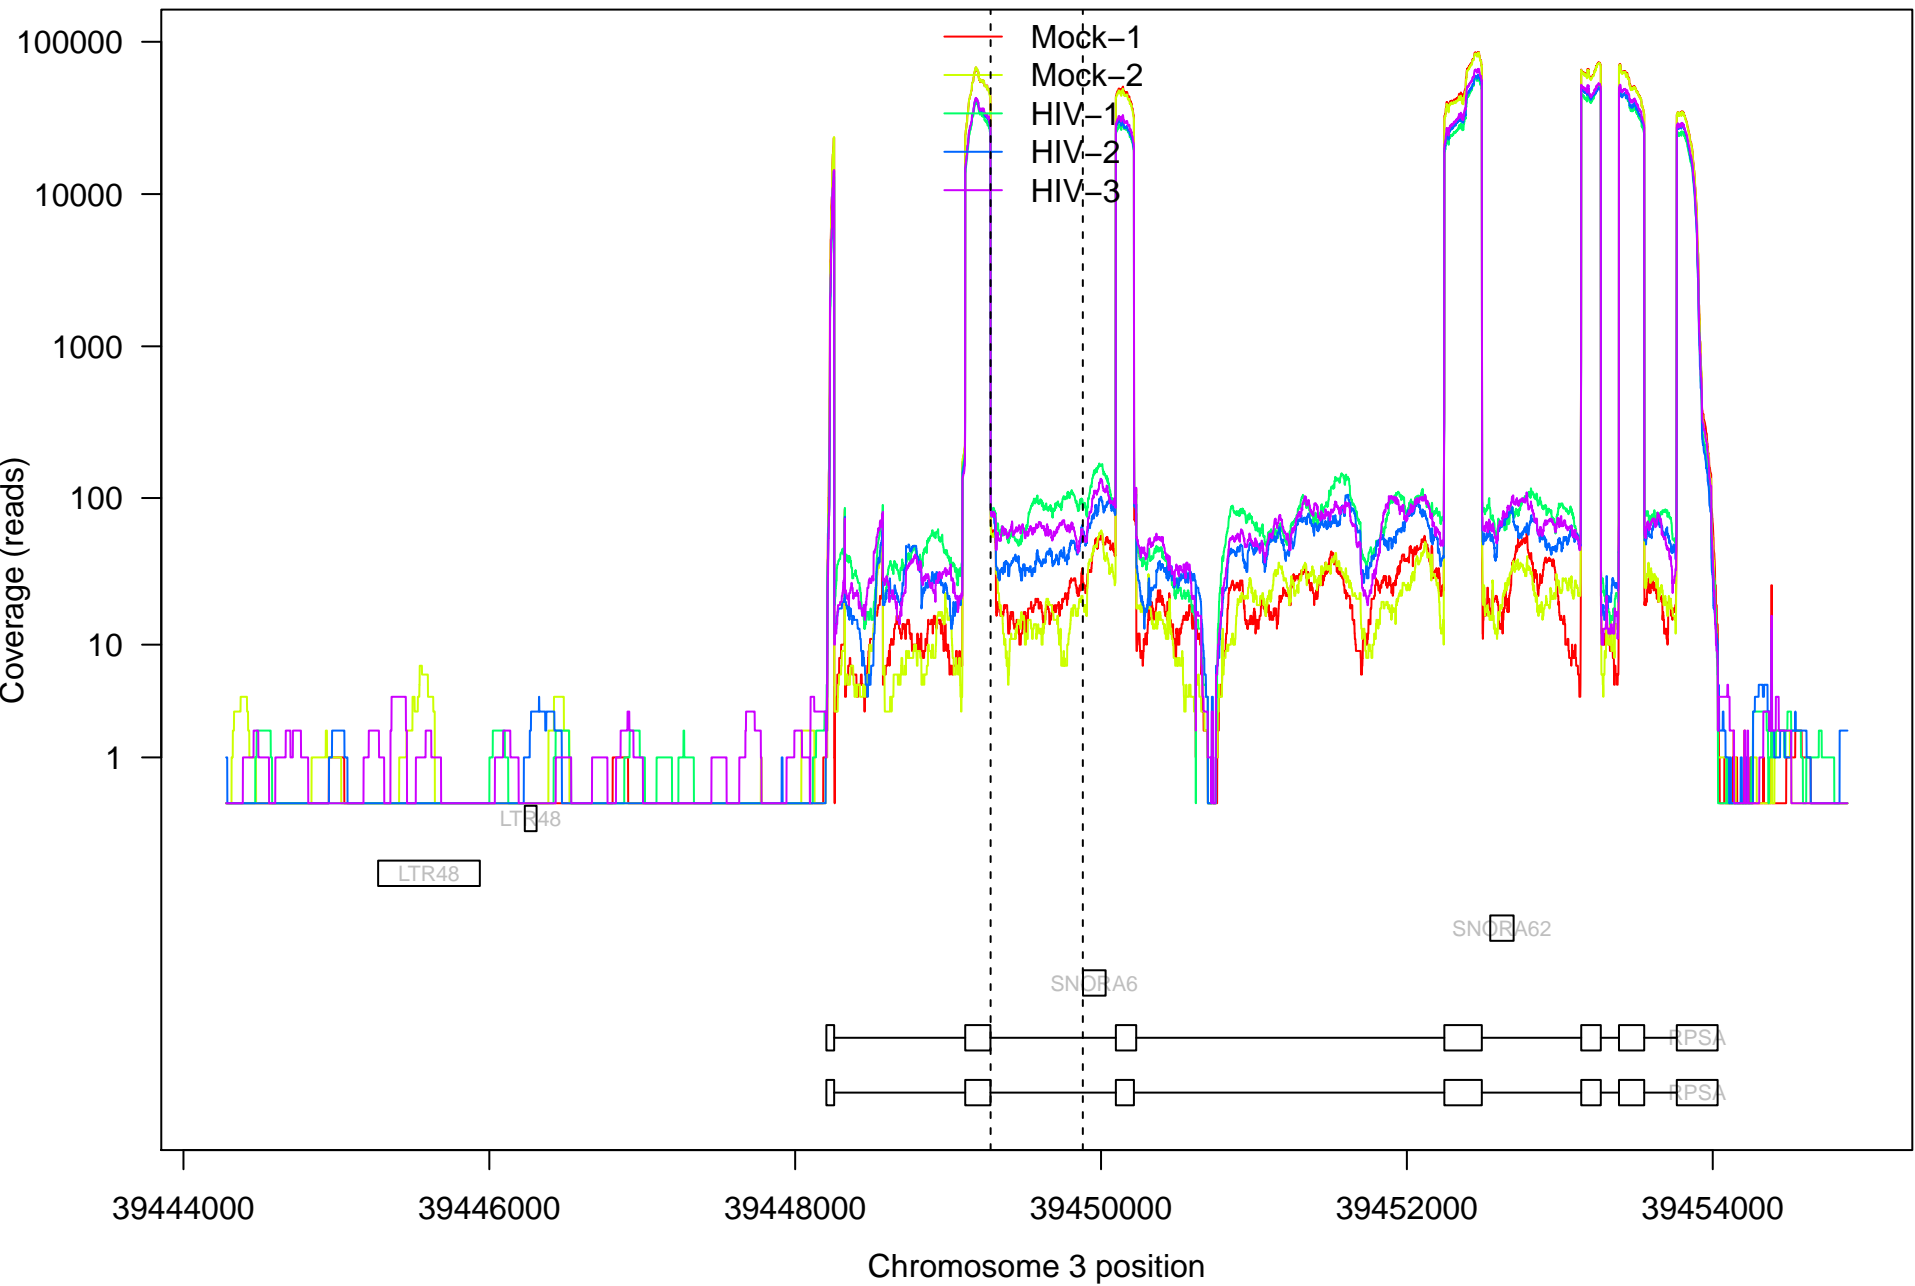

A.34

chr11:17097171-17098714

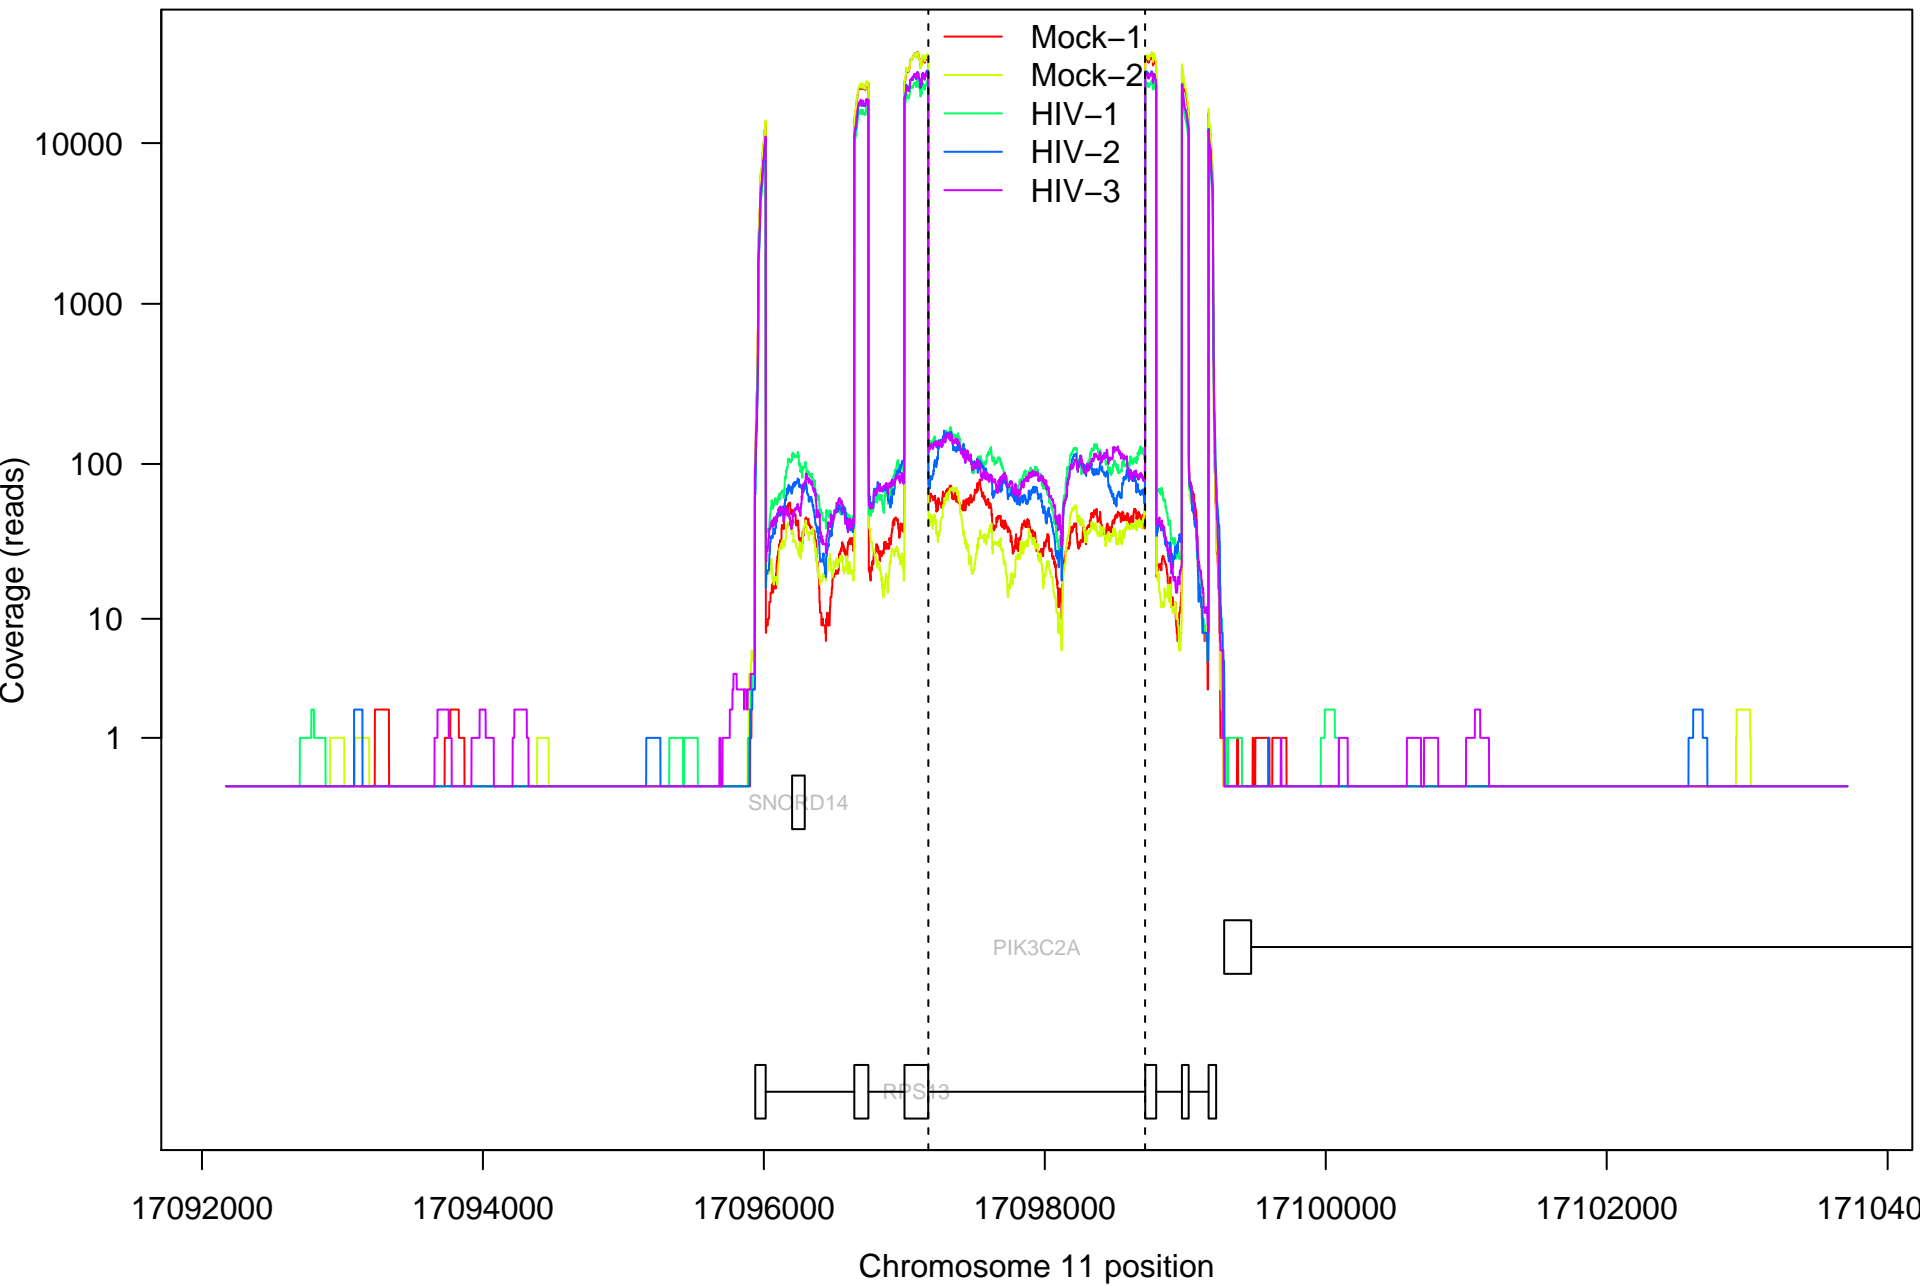

A.35

chr17:27047909–27049599

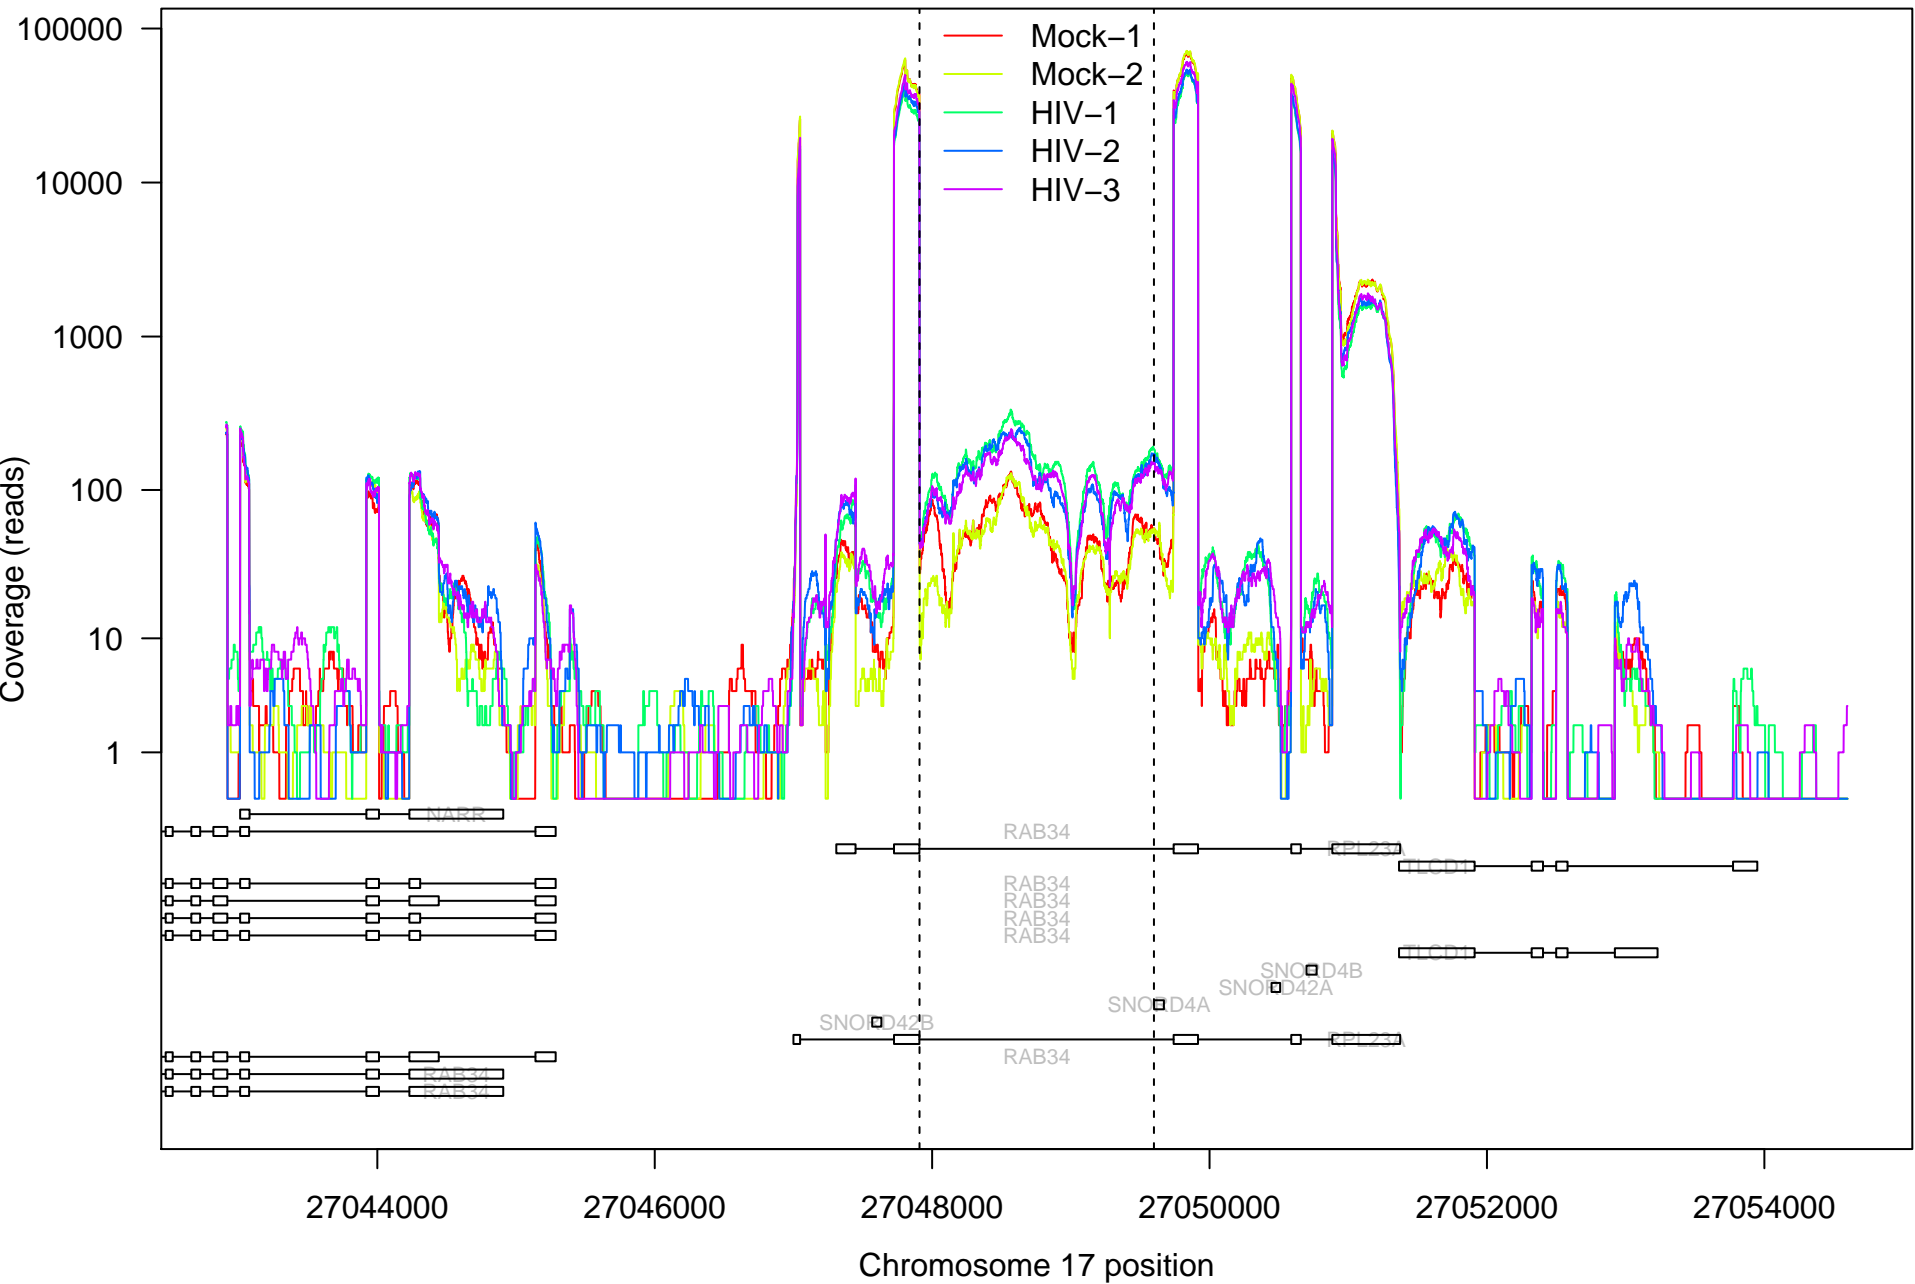

A.36

chr3:39450231-39452244

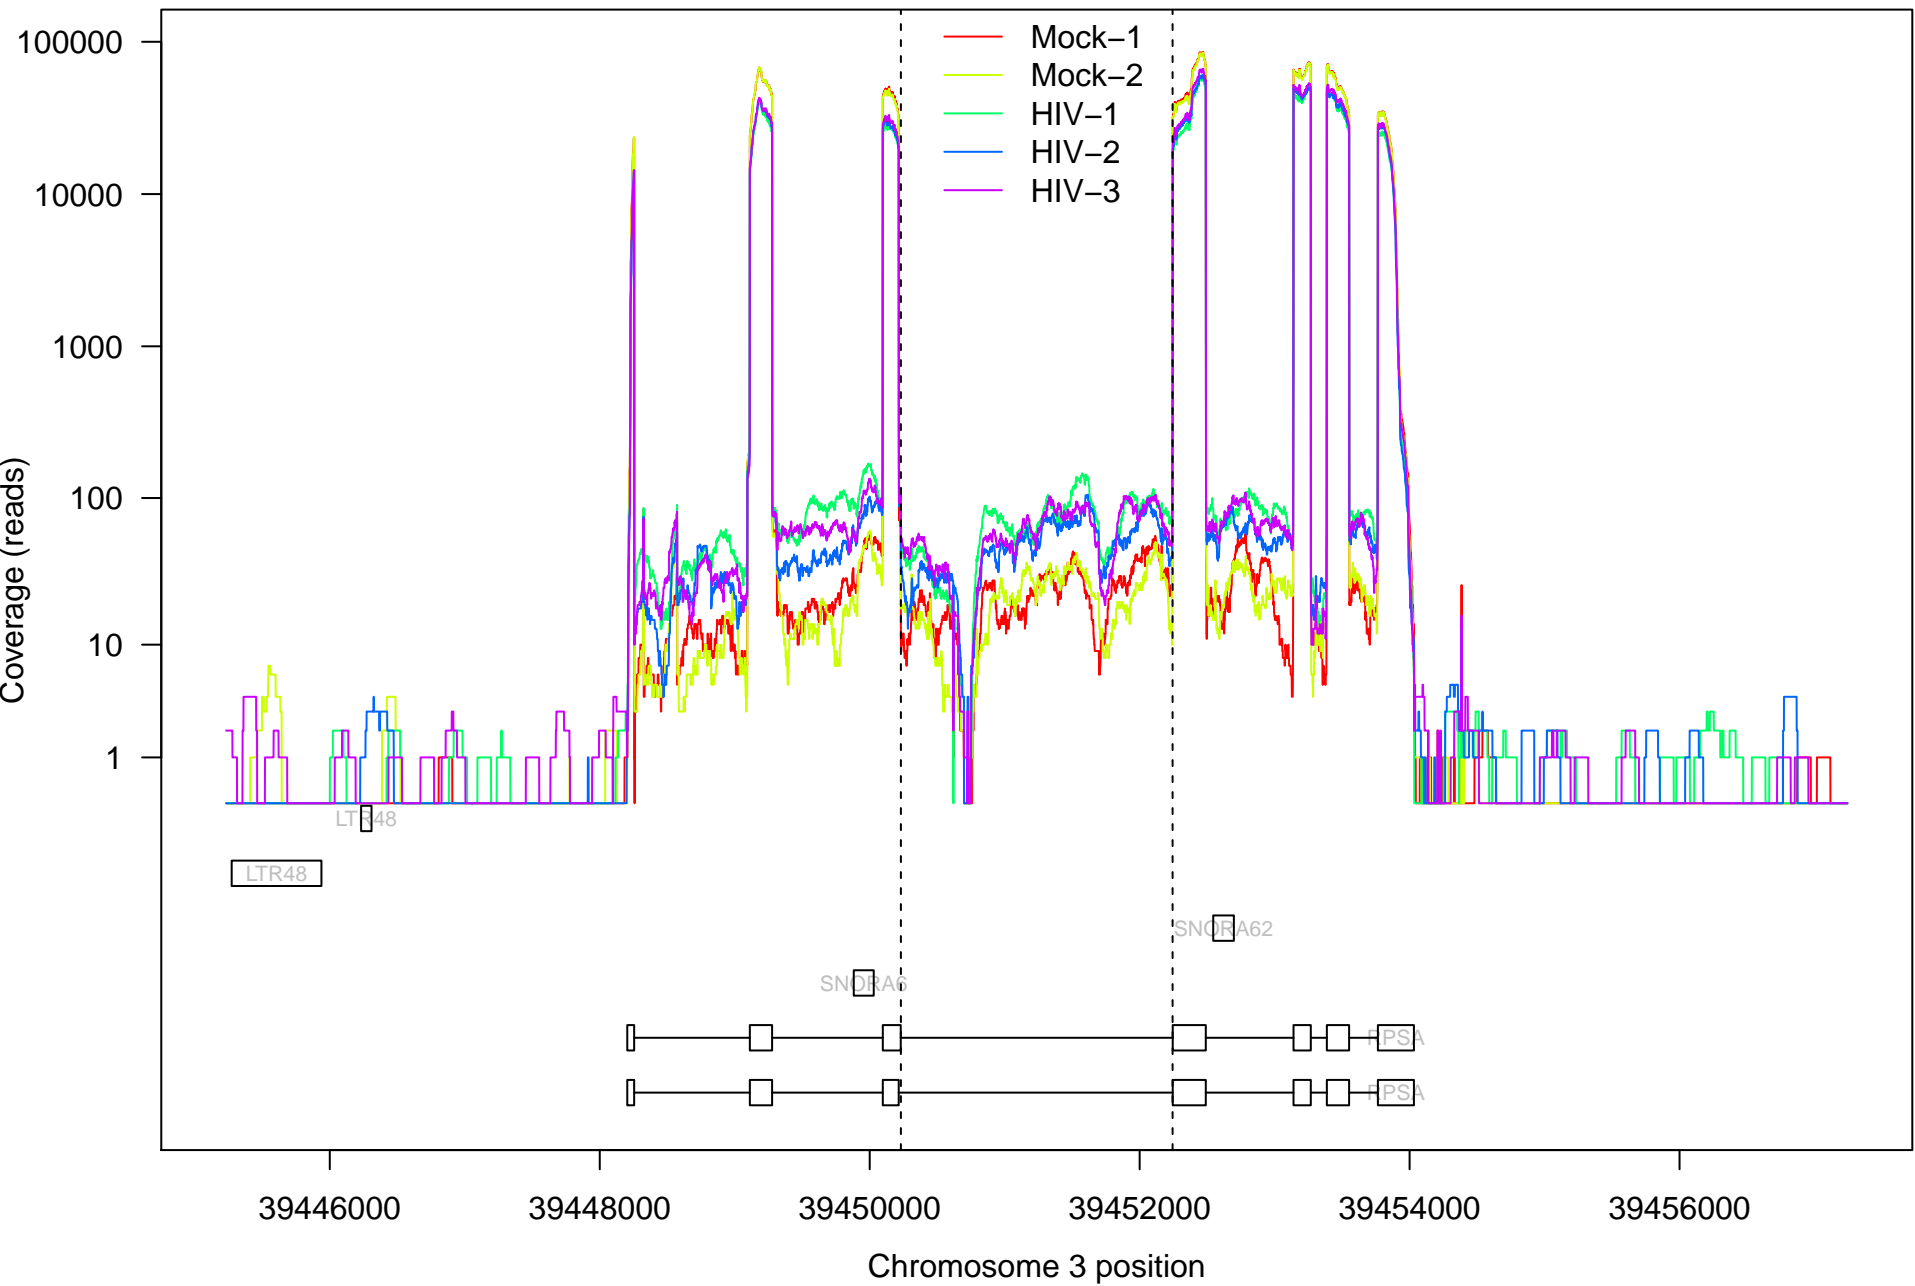

A.37

chr22:39710214-39710690

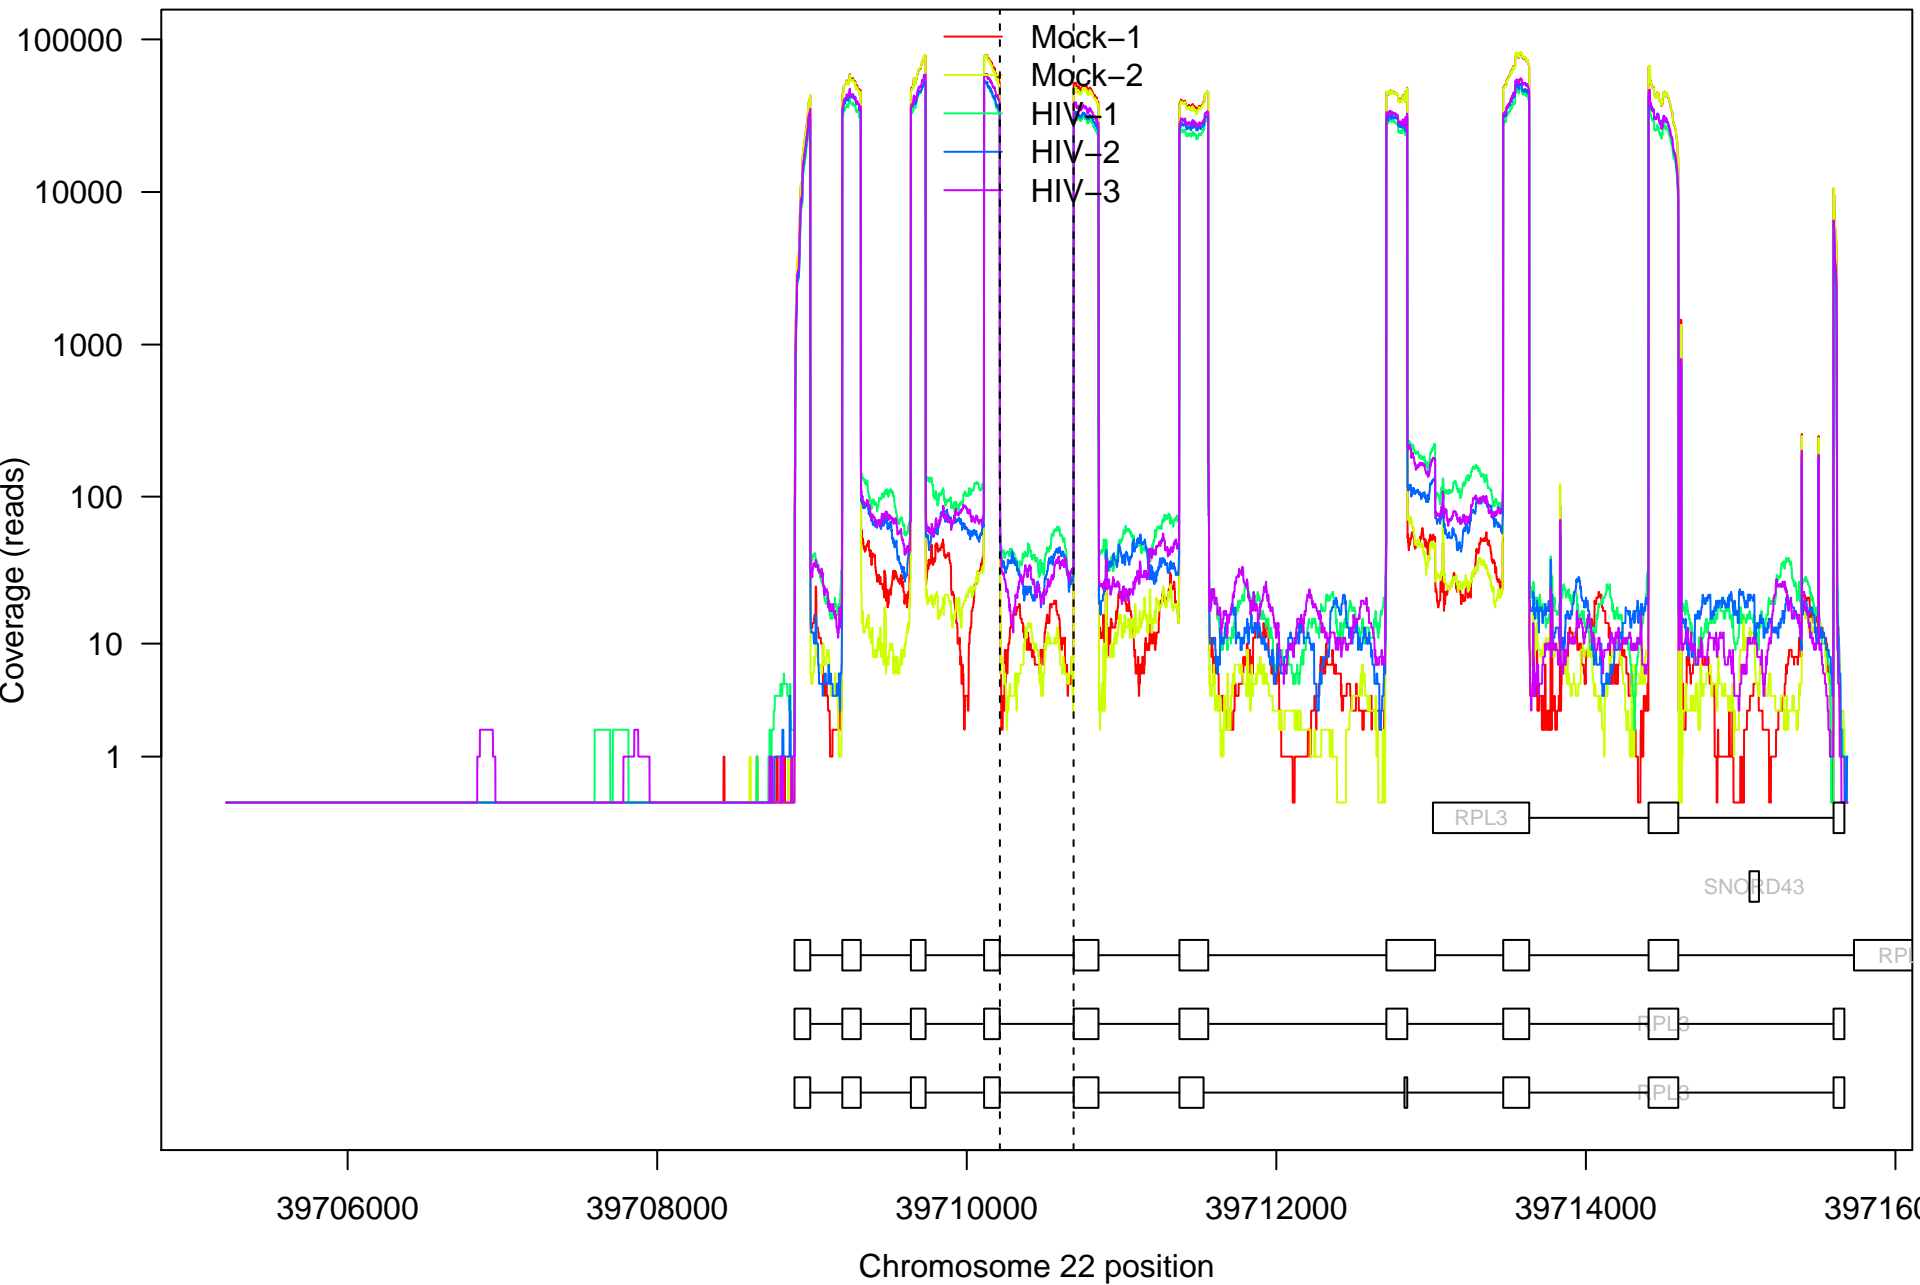

A.38

## chrX:100653935-100655653

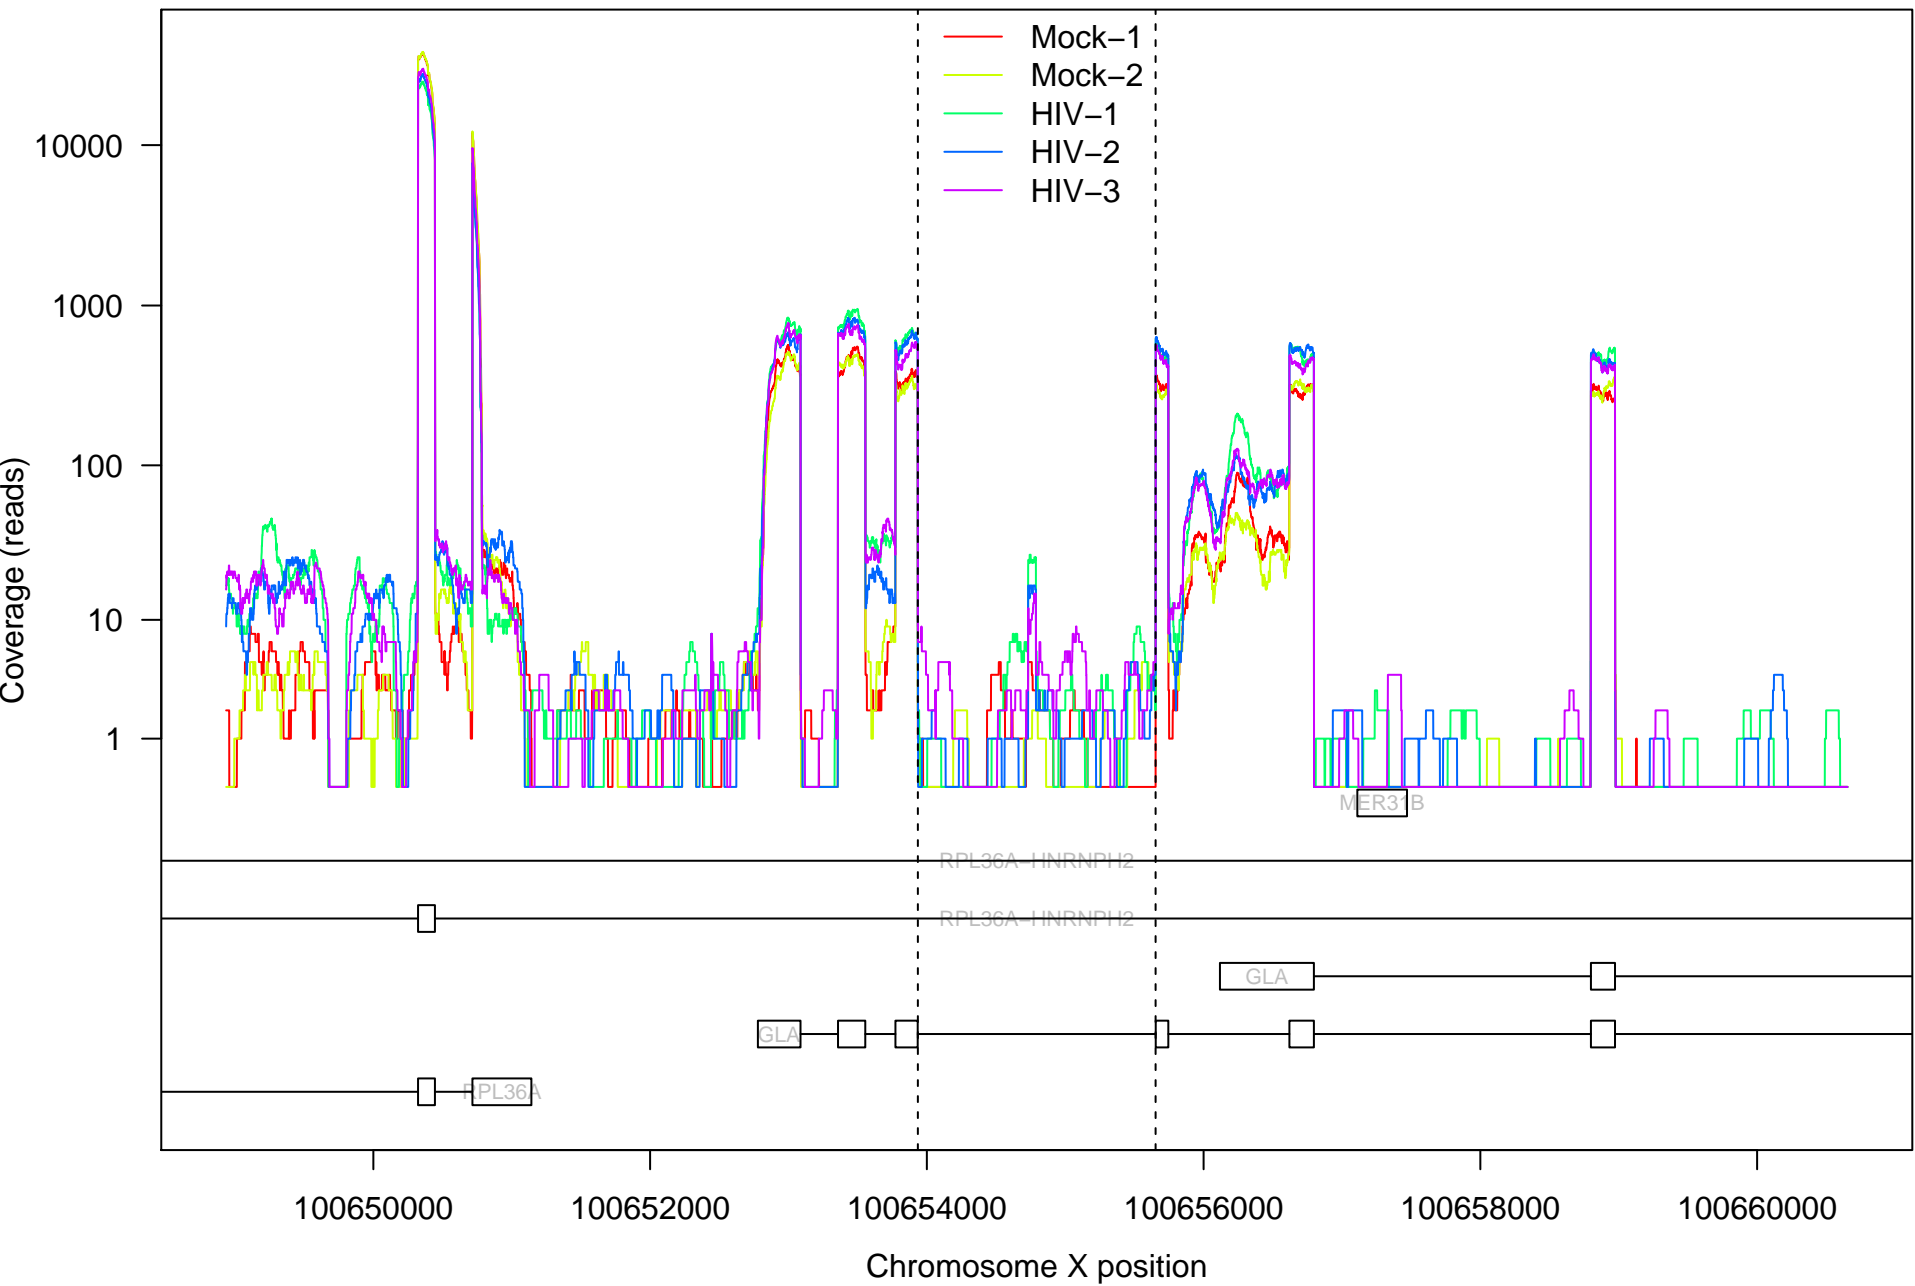

A.39

chrX:153627179-153627678

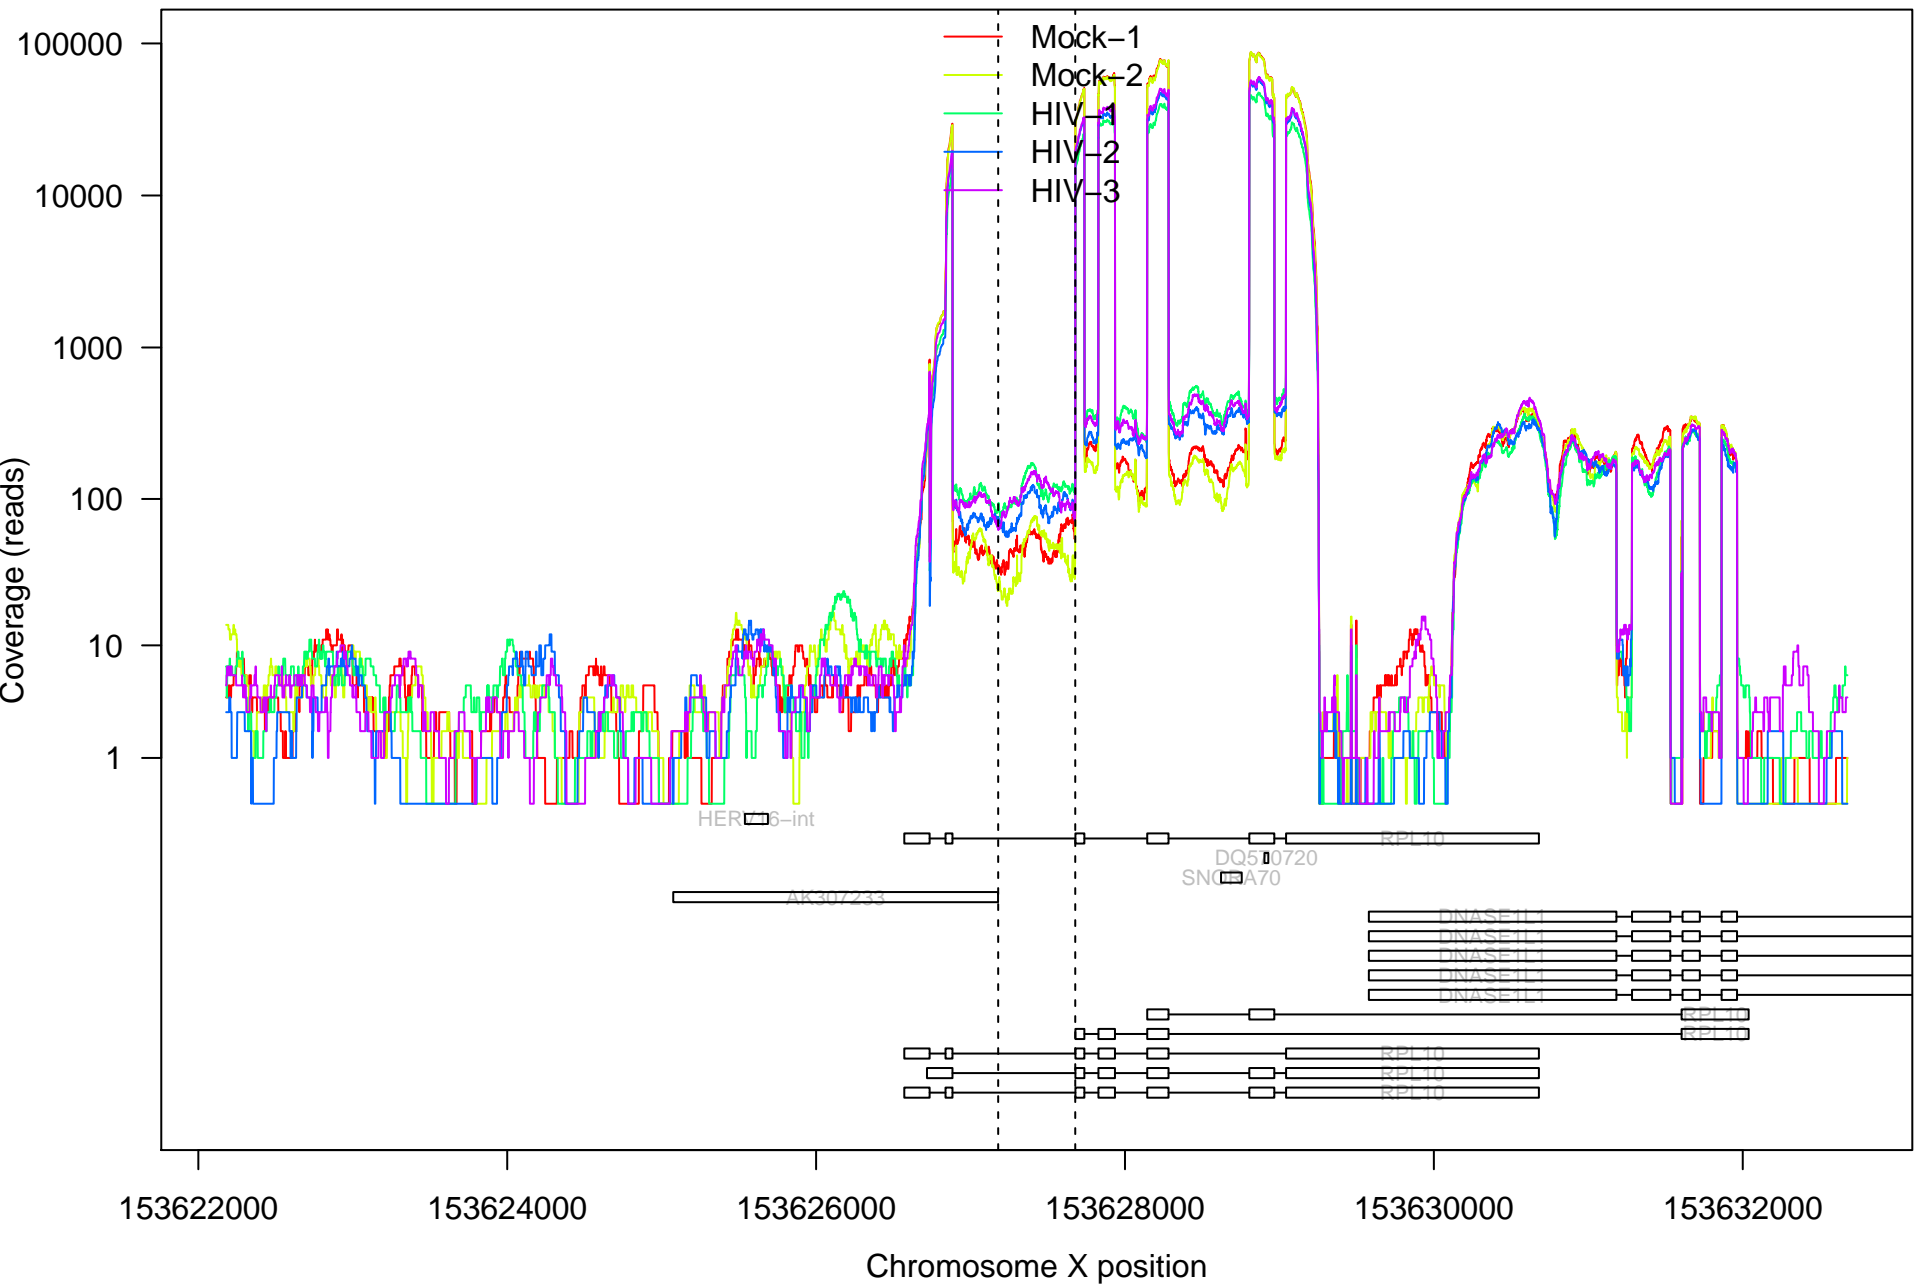

# A.40 chr13:27828419-27829200

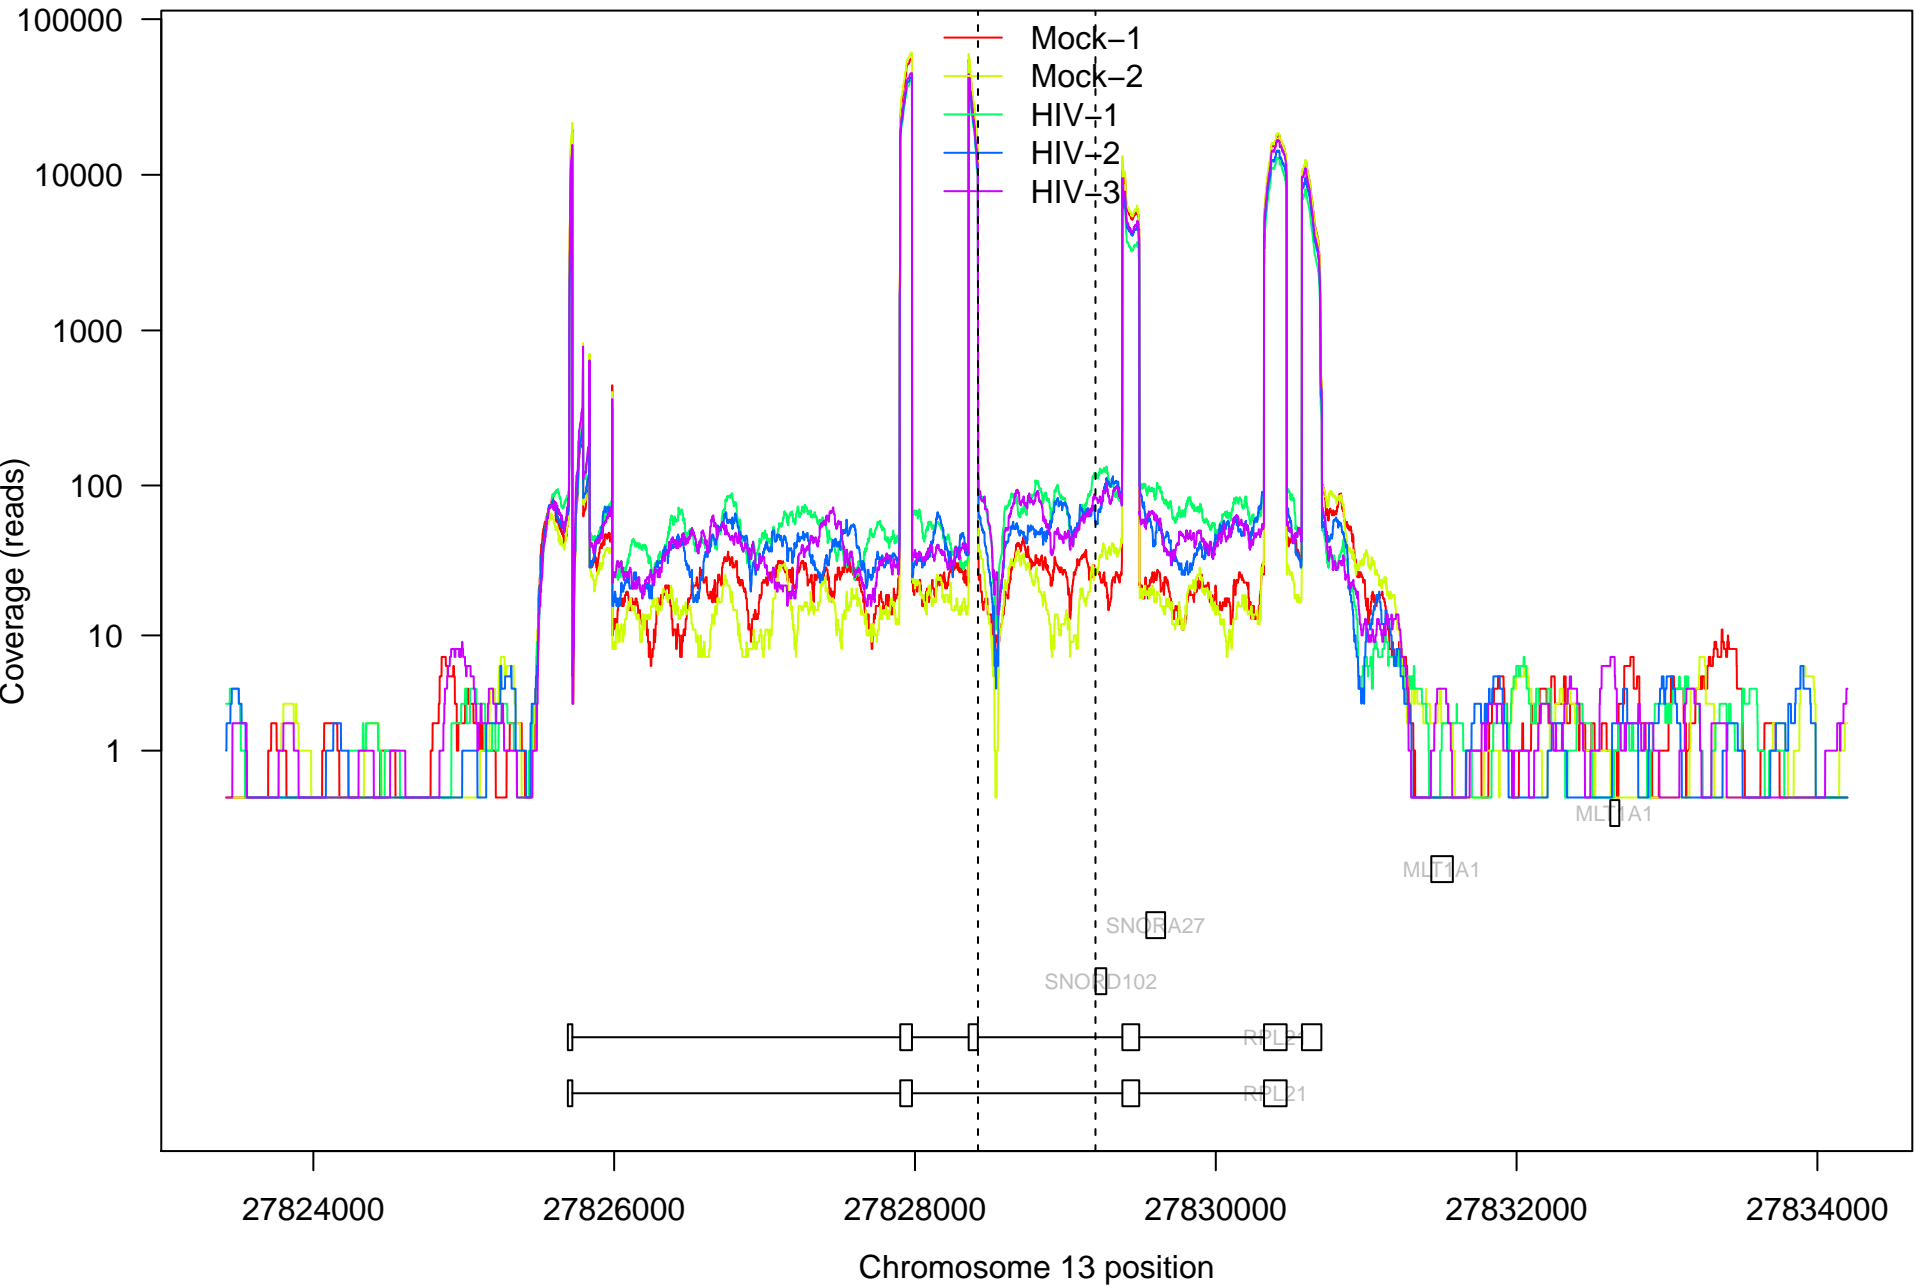



A.41

chr11:11888764–11888891

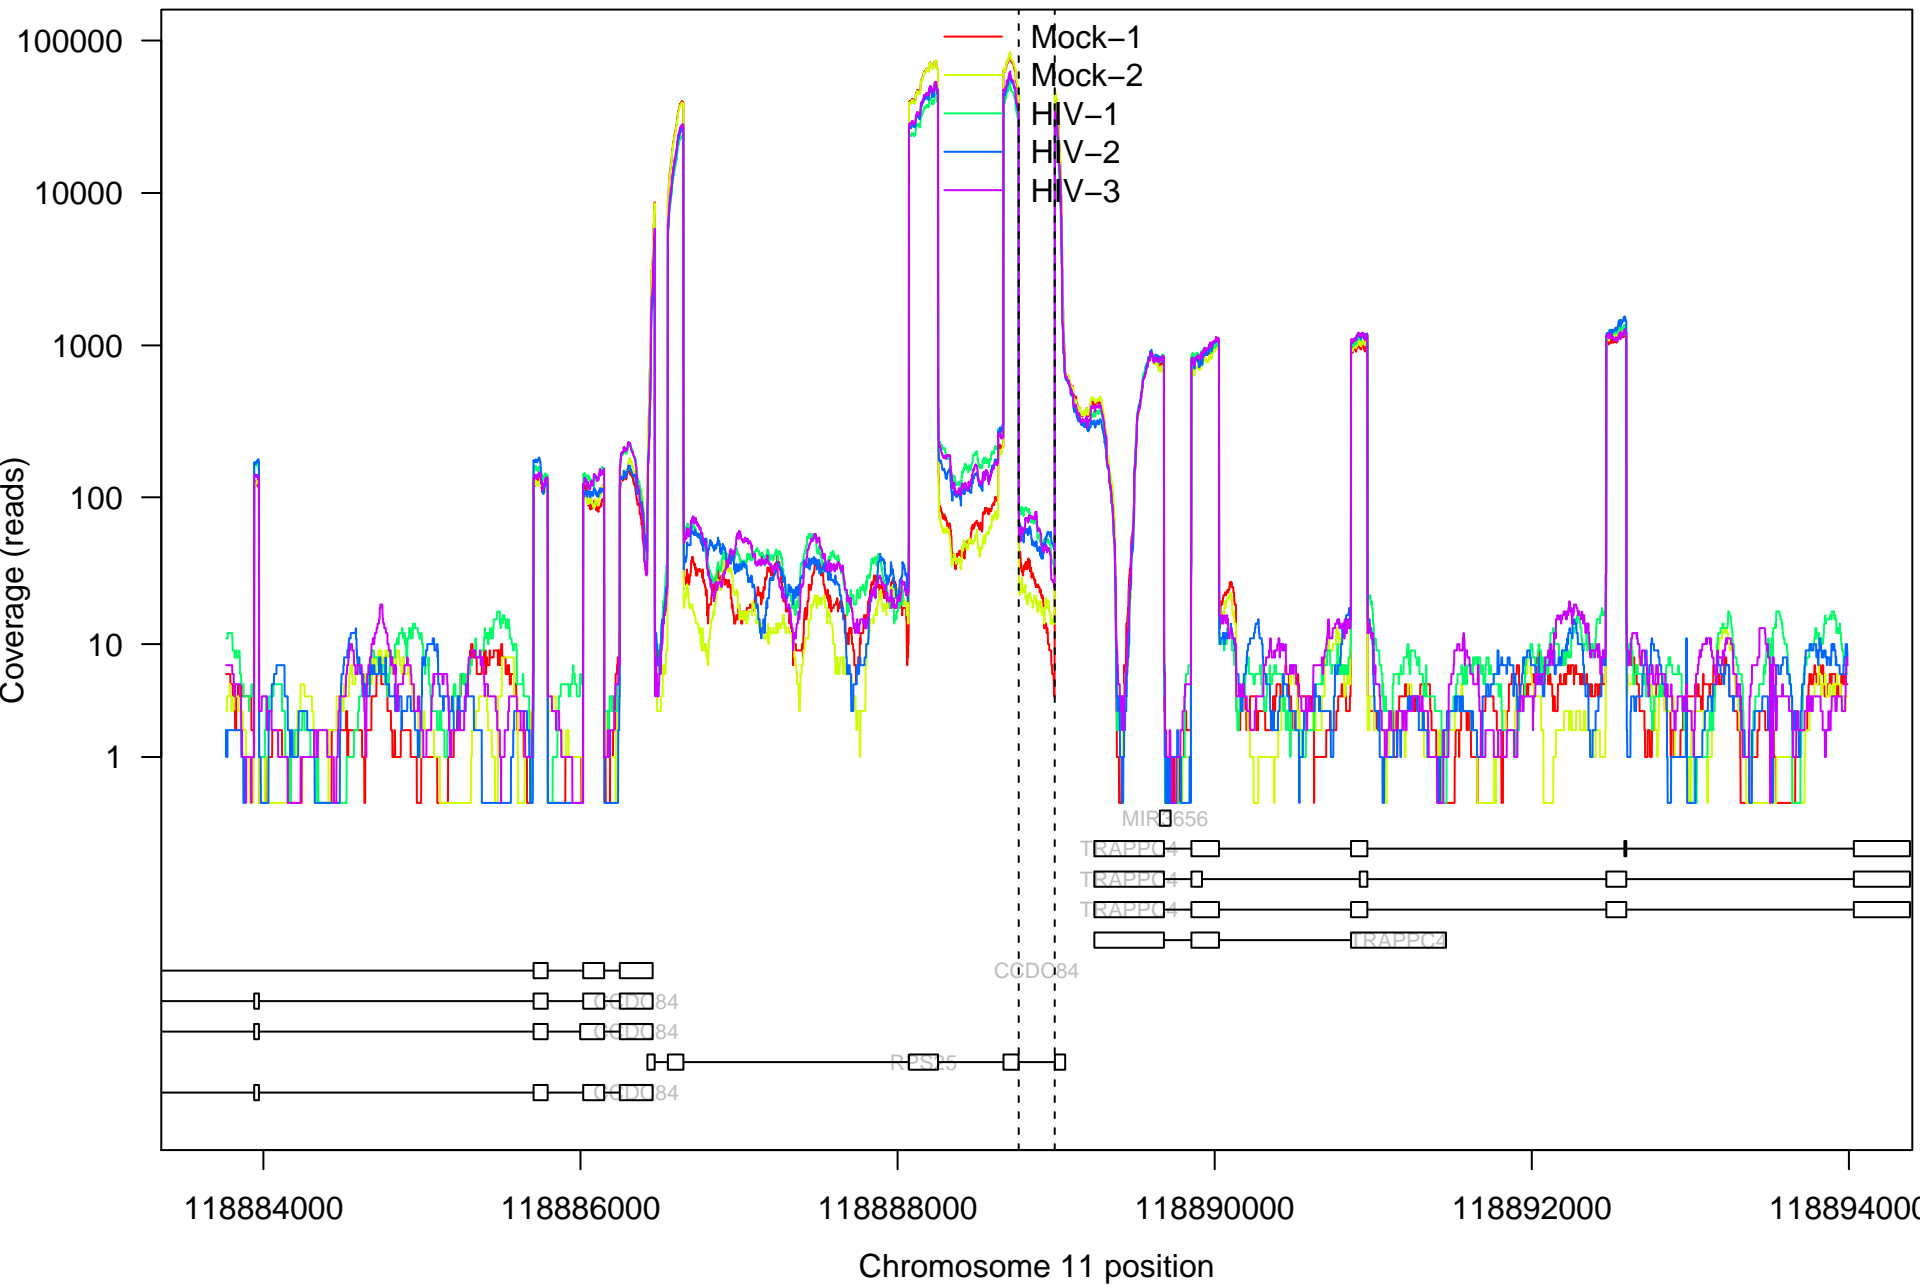

A.42

chr6:133138491-133138618

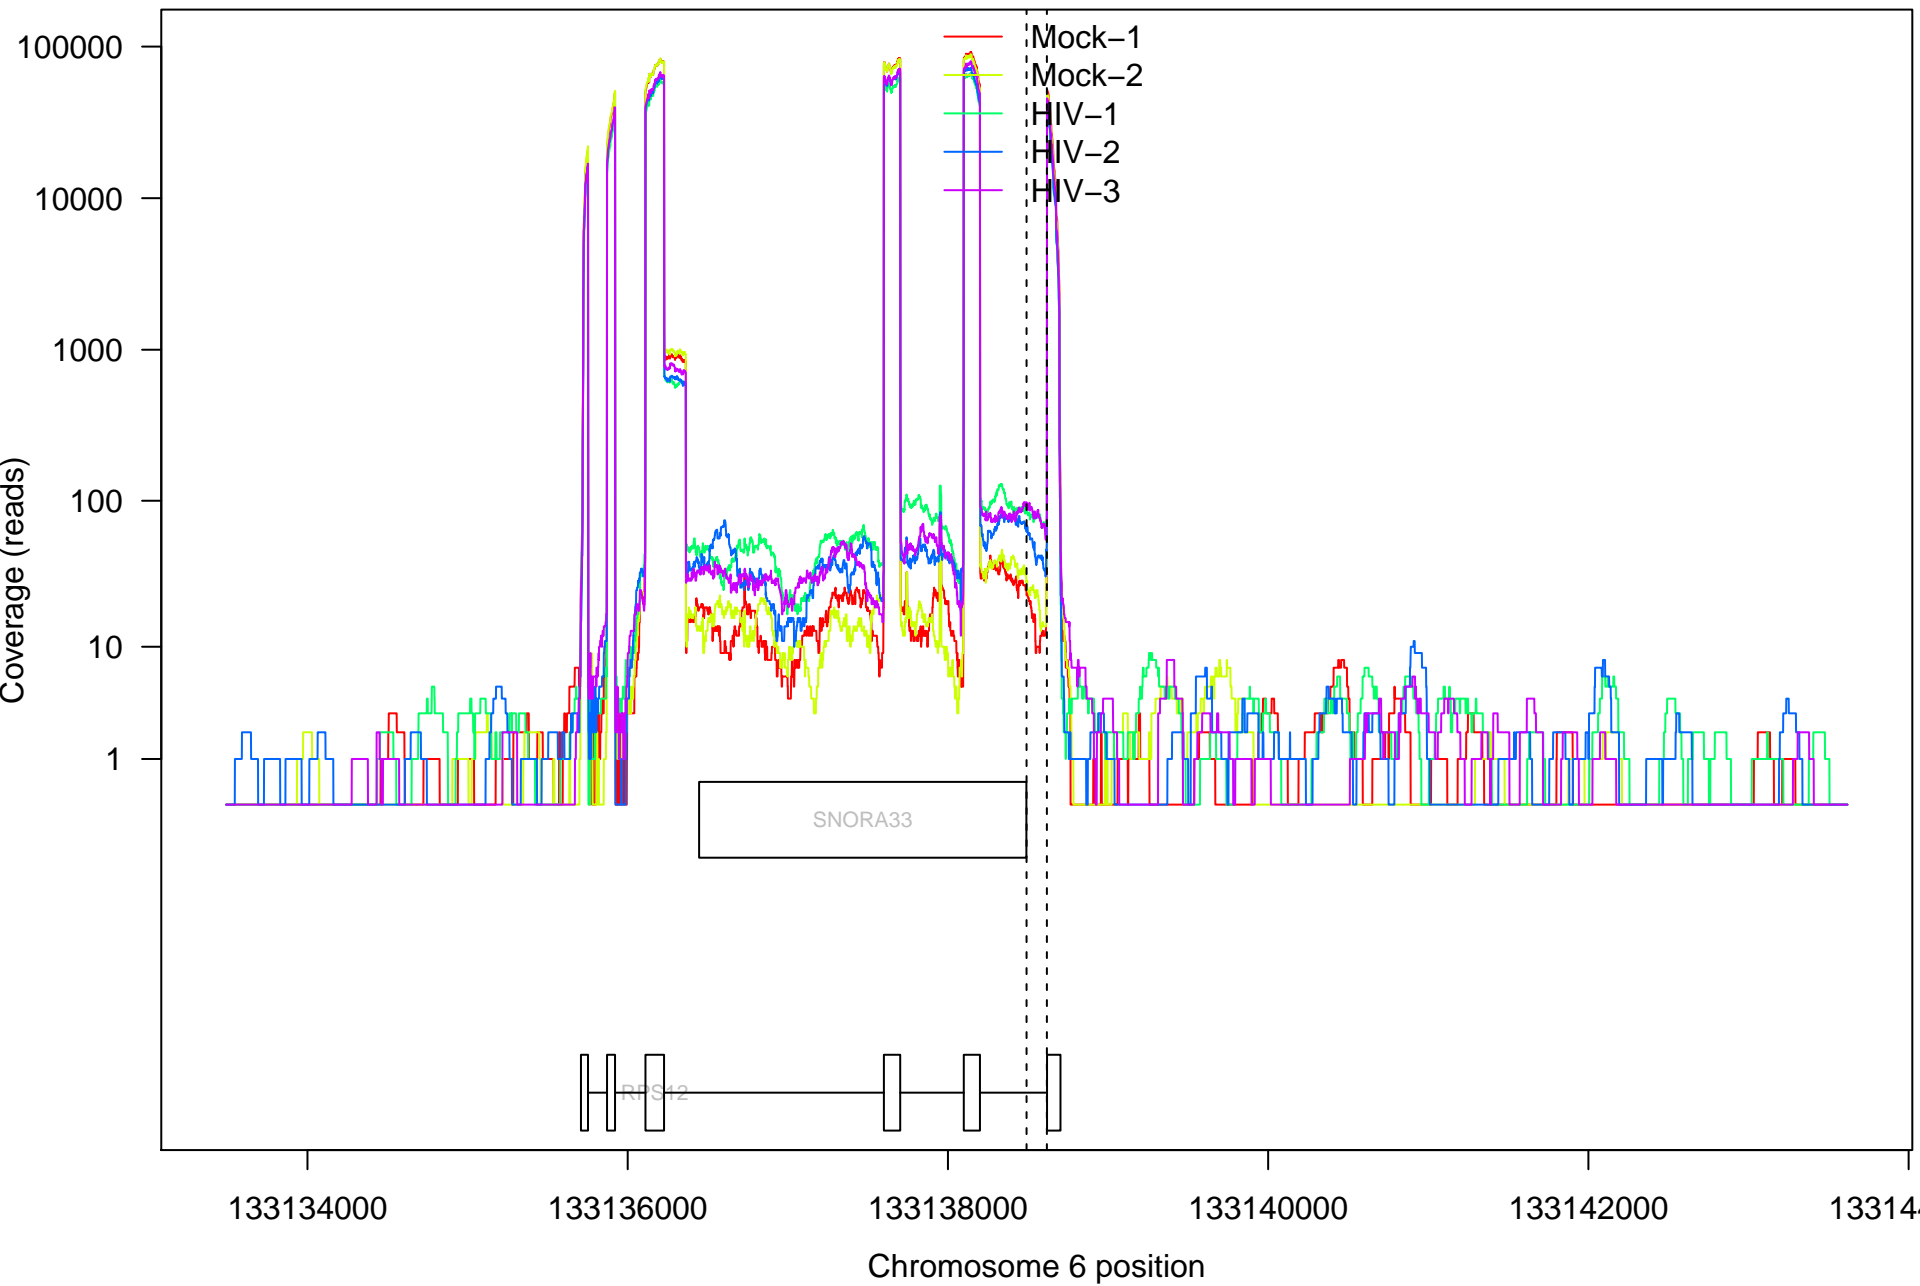

A.43

chr13:27829273-27829378

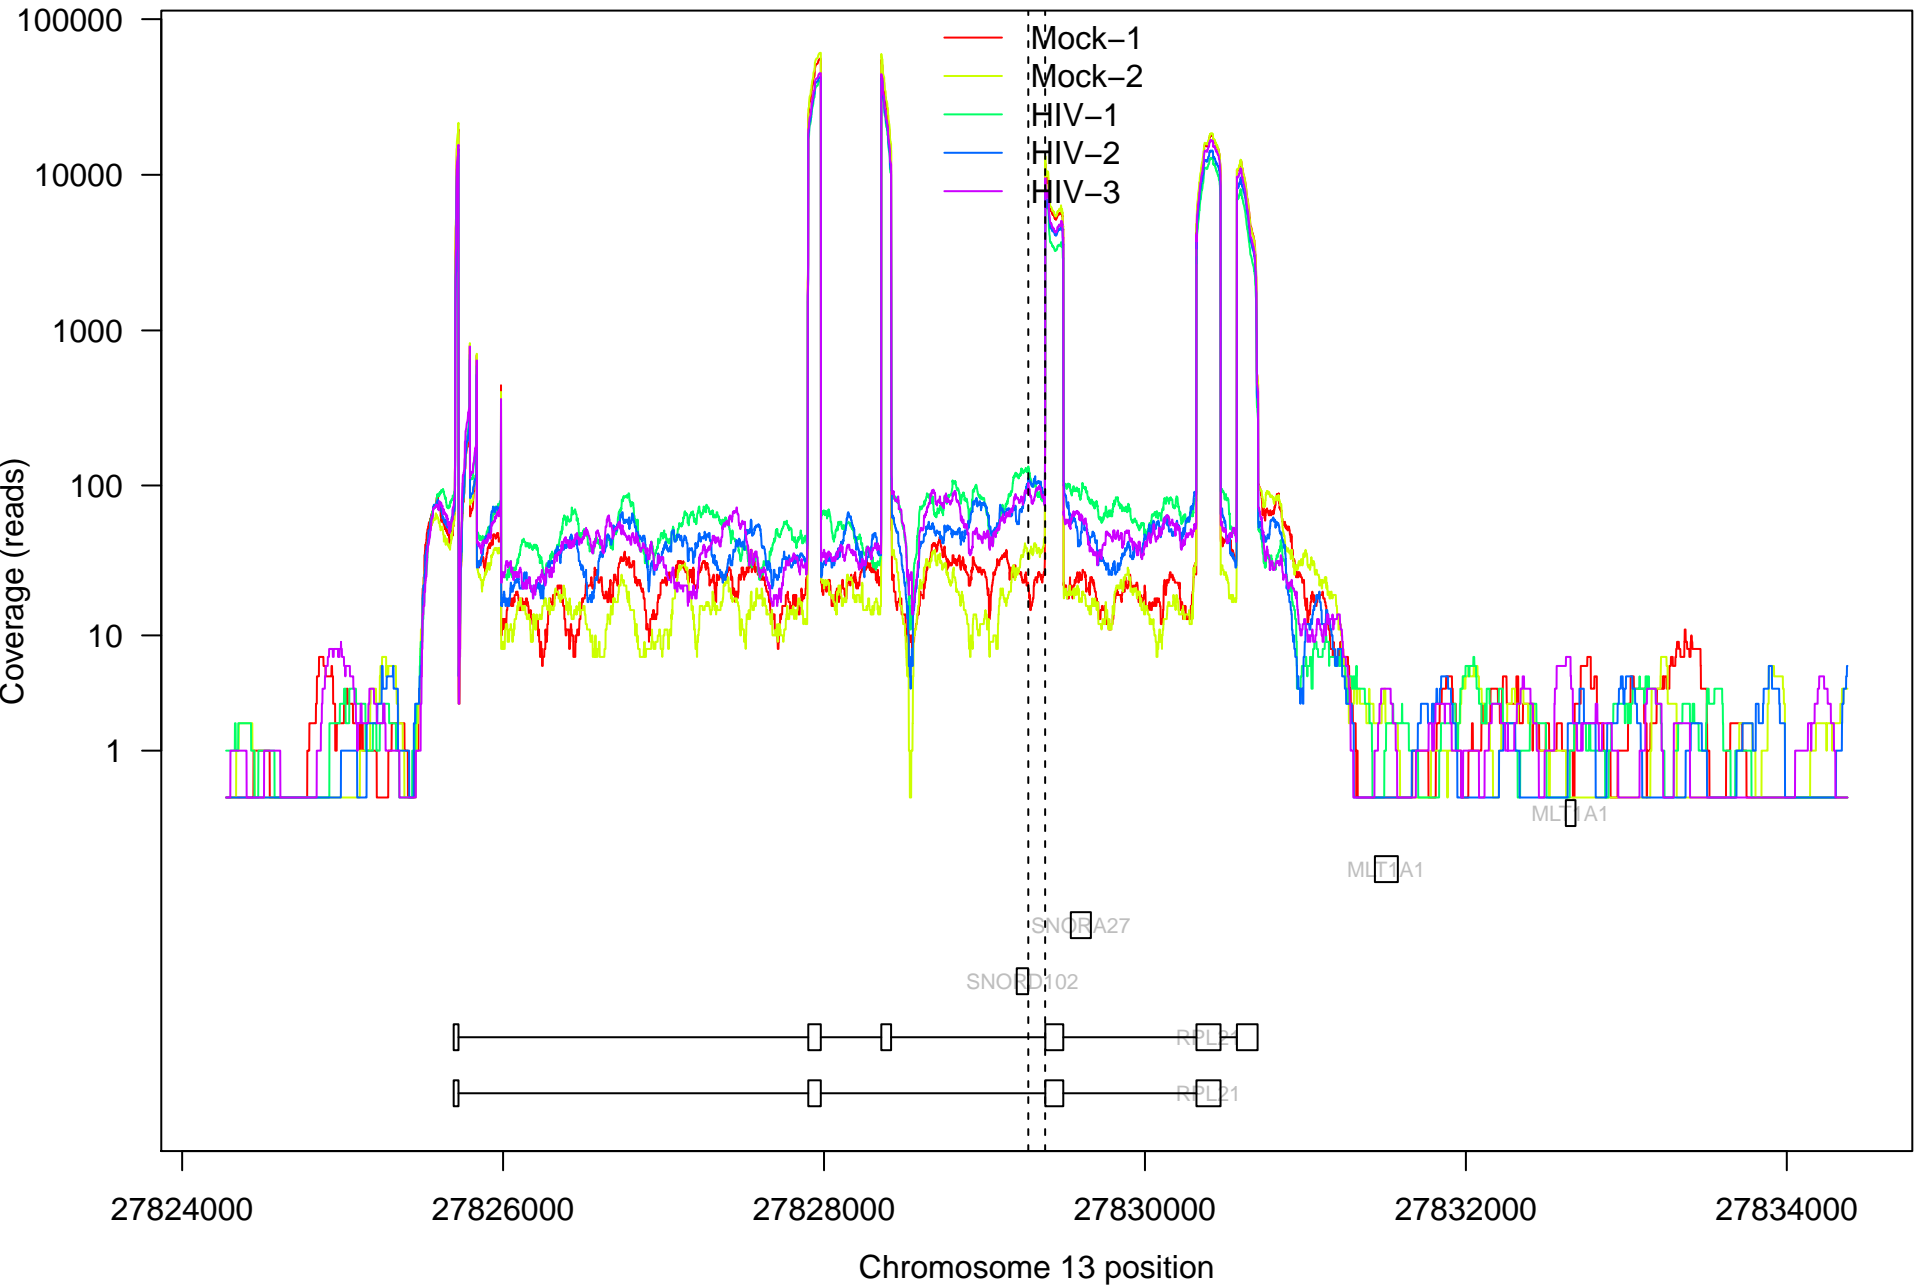

A.44

## chr9:136217175-136217310

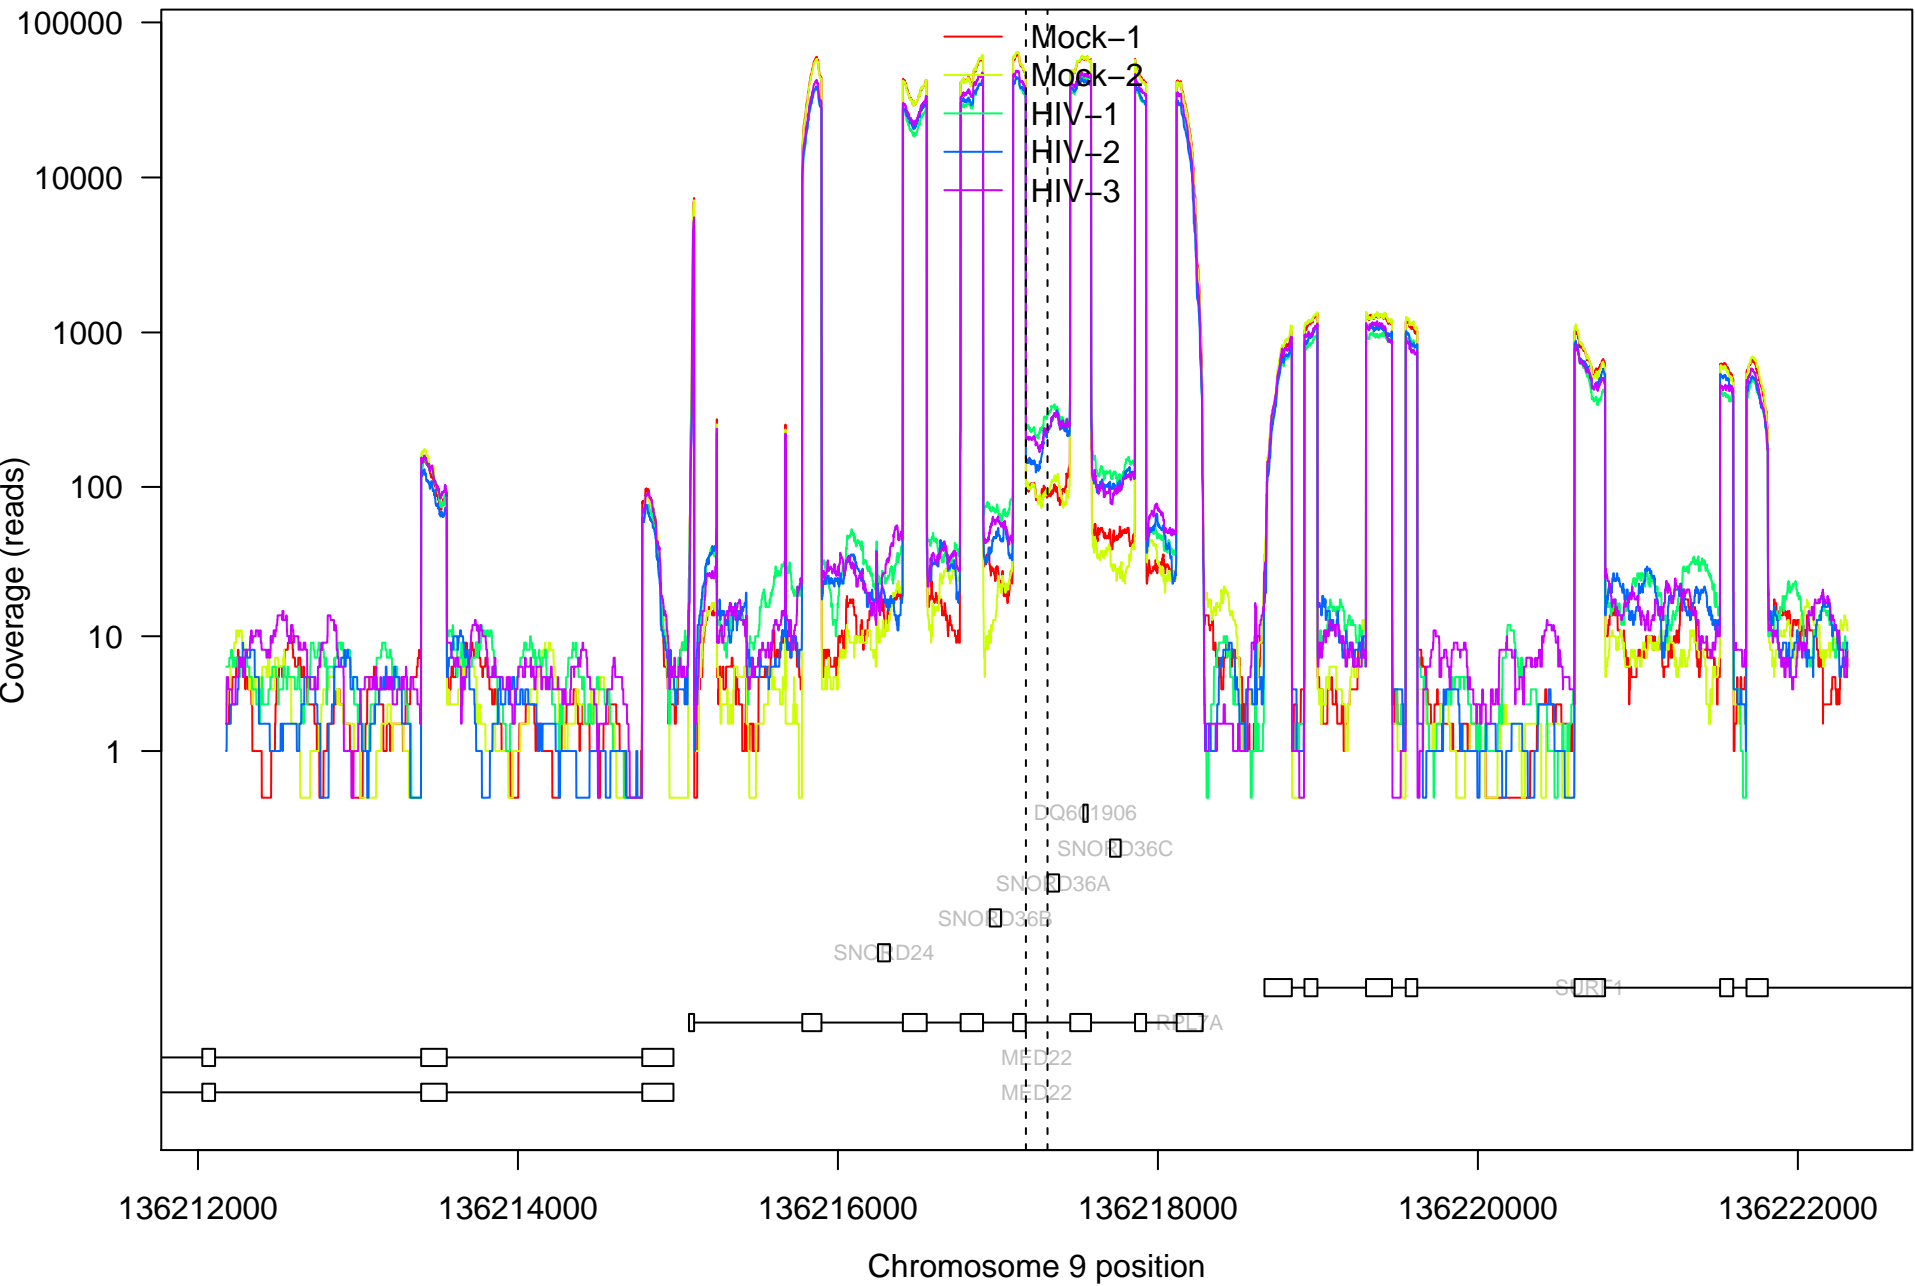

A.45

chr11:17096745–17097000

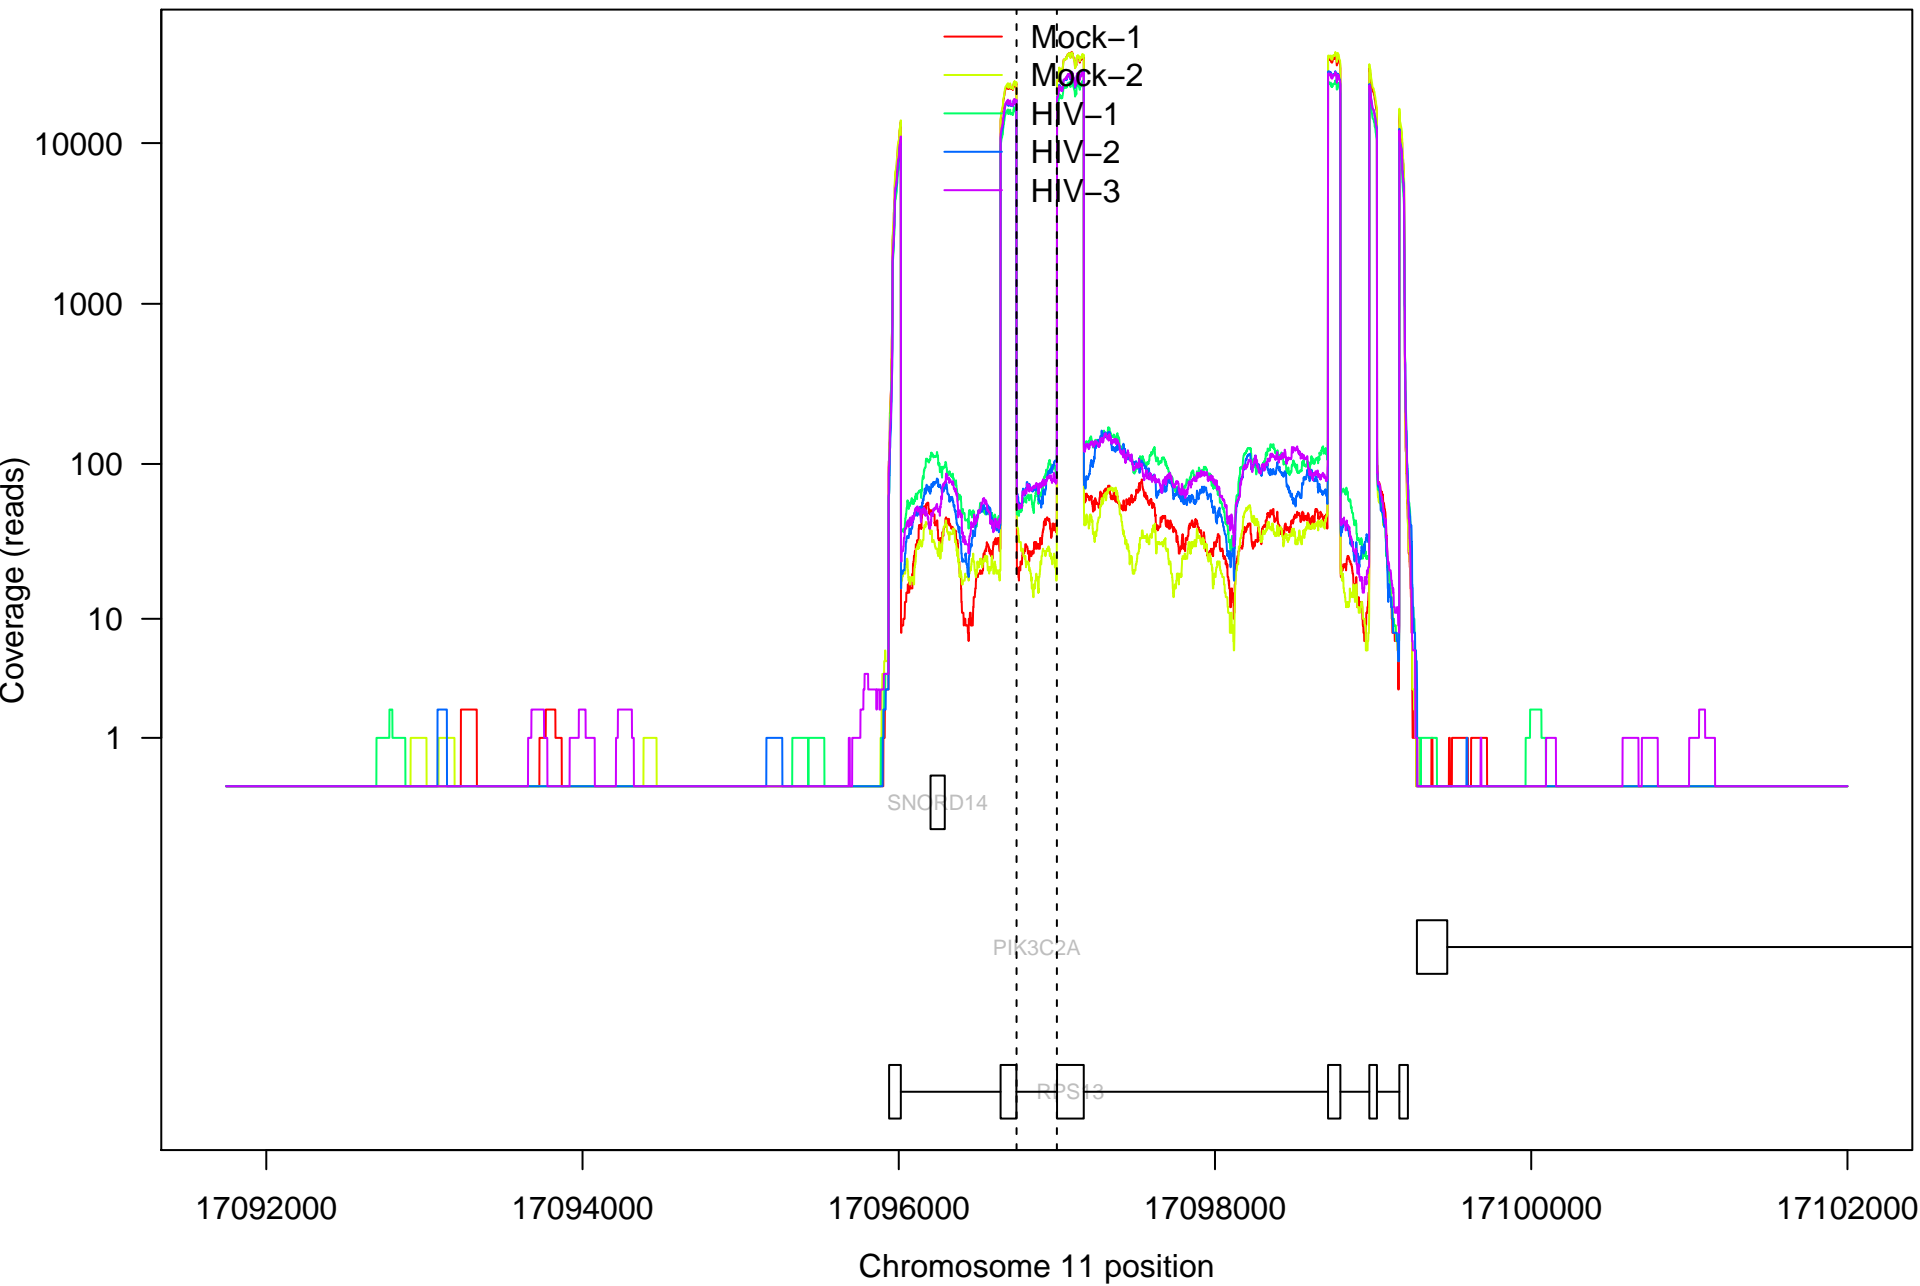

A.46

chr1:93303628-93306107

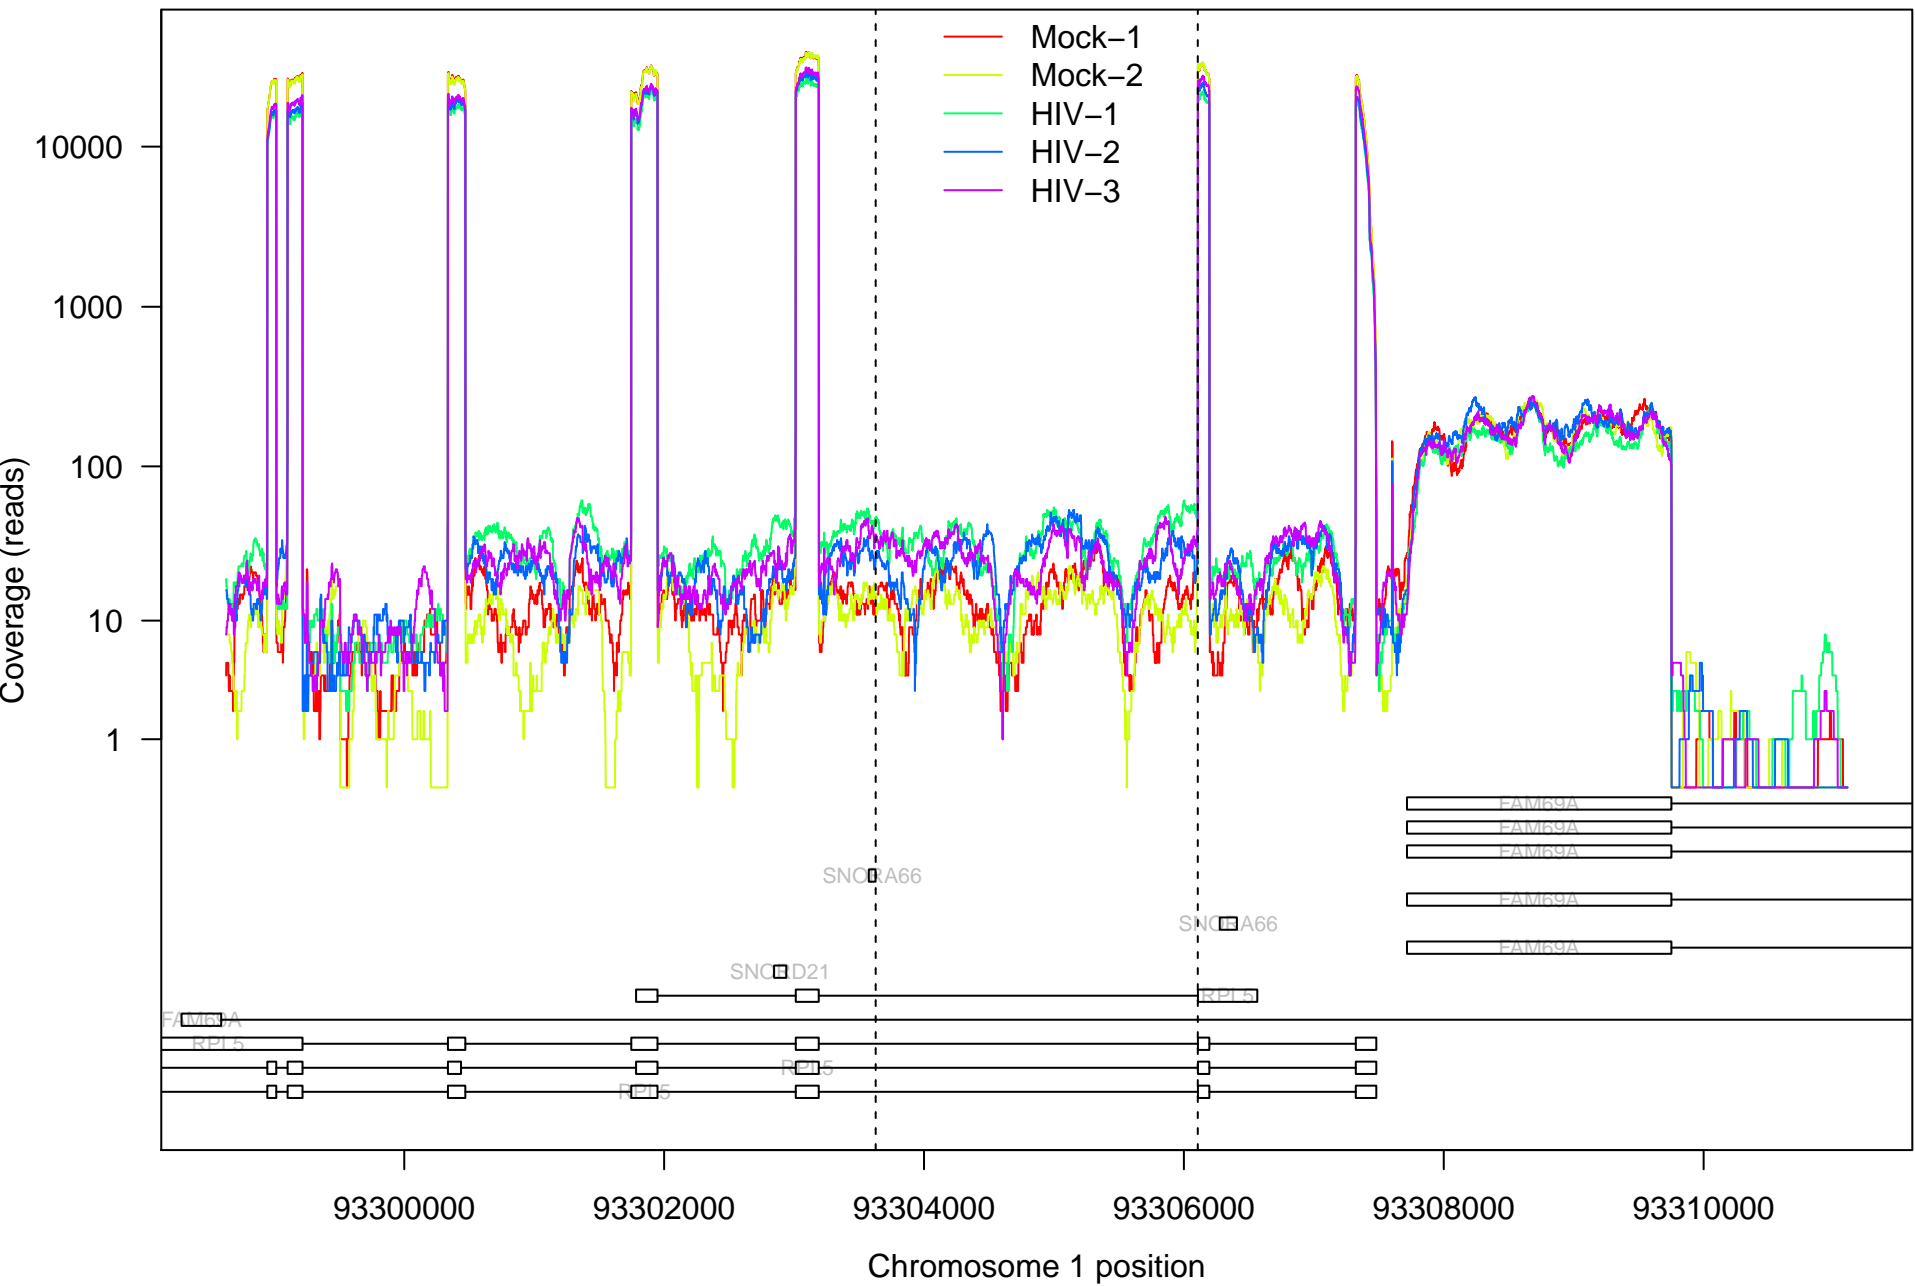

A.47

chr11:75115913-75116626

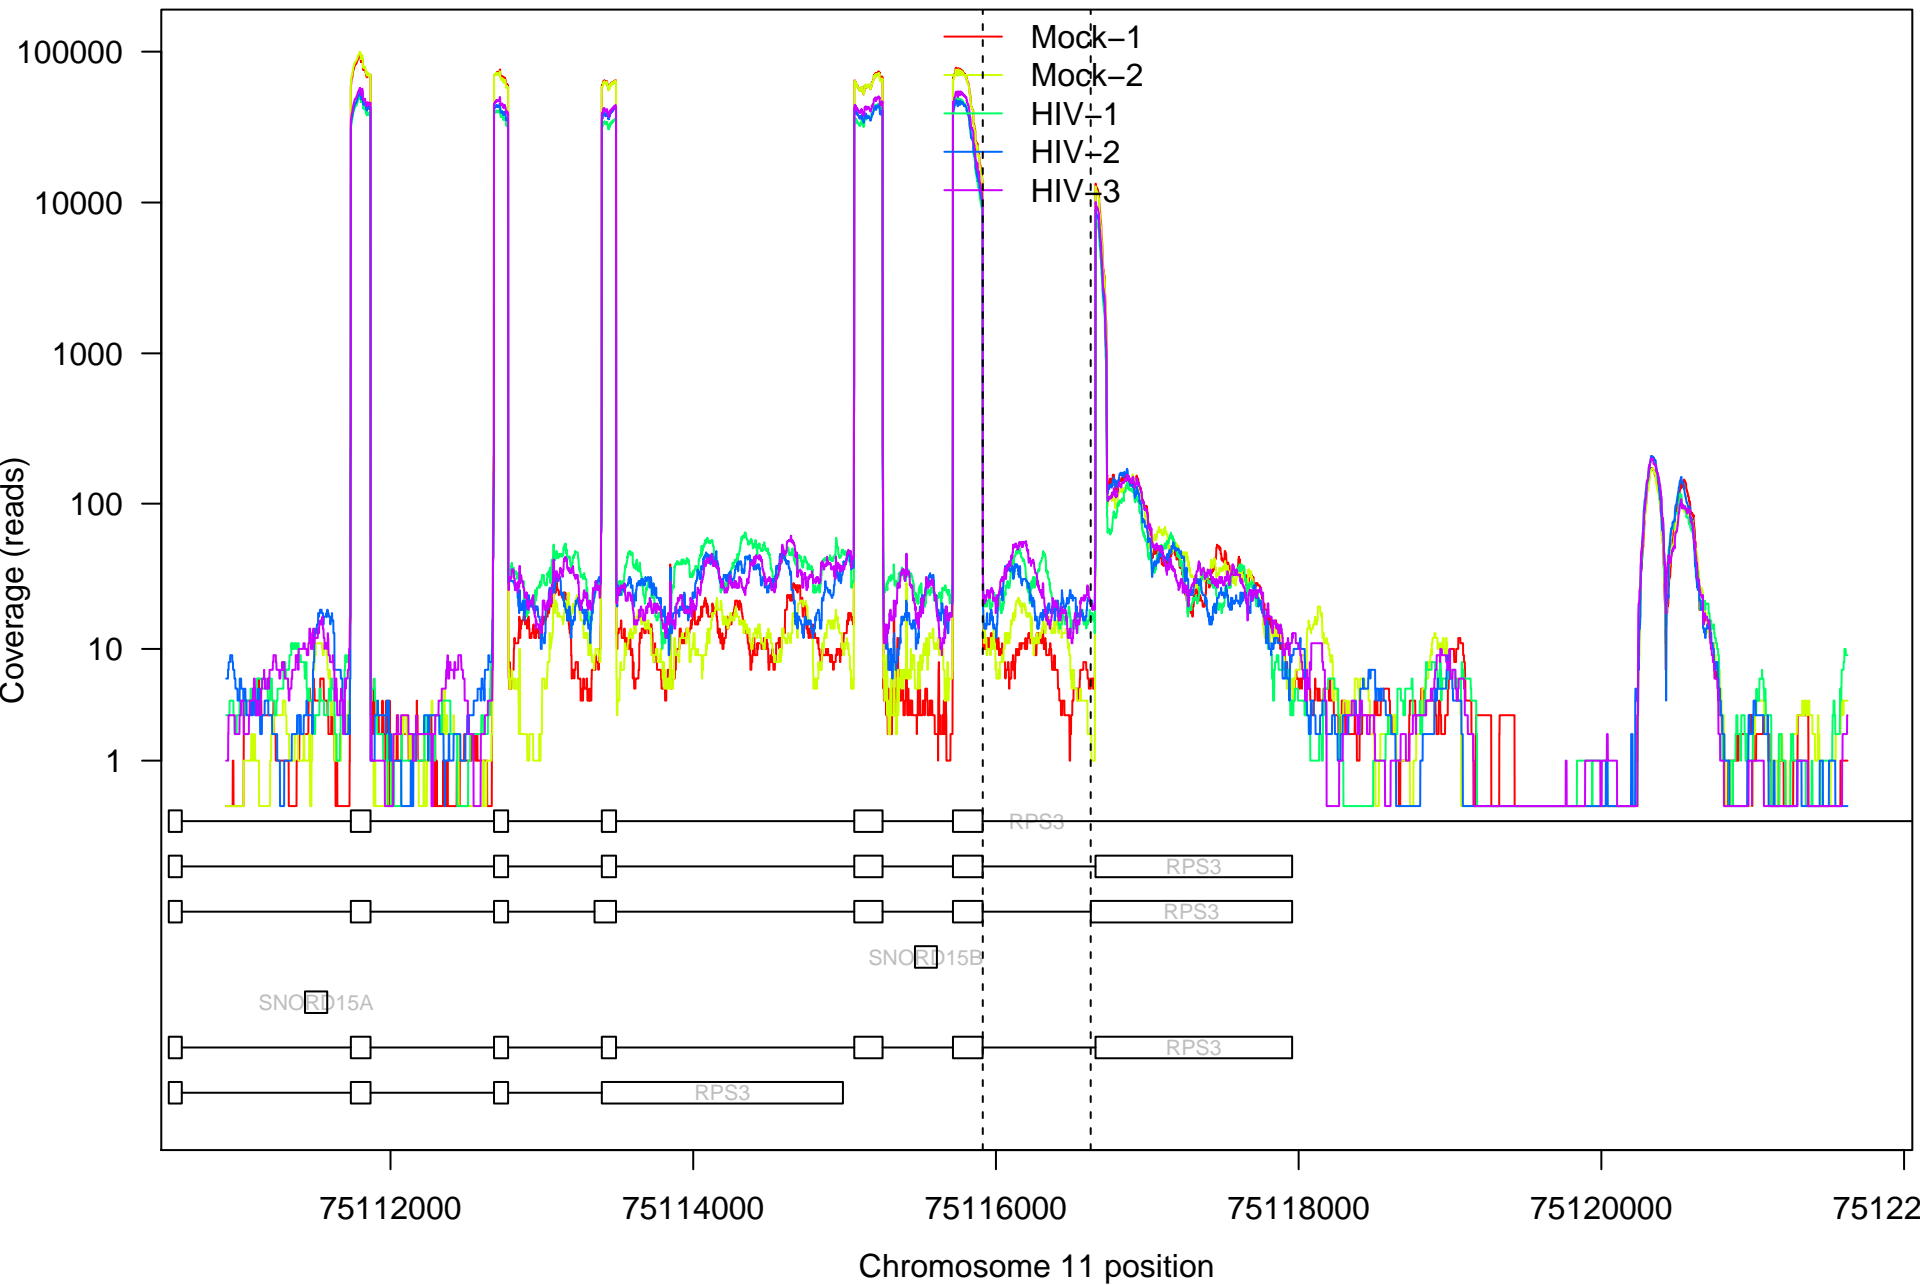

# A.48 chr19:39924402-39926246

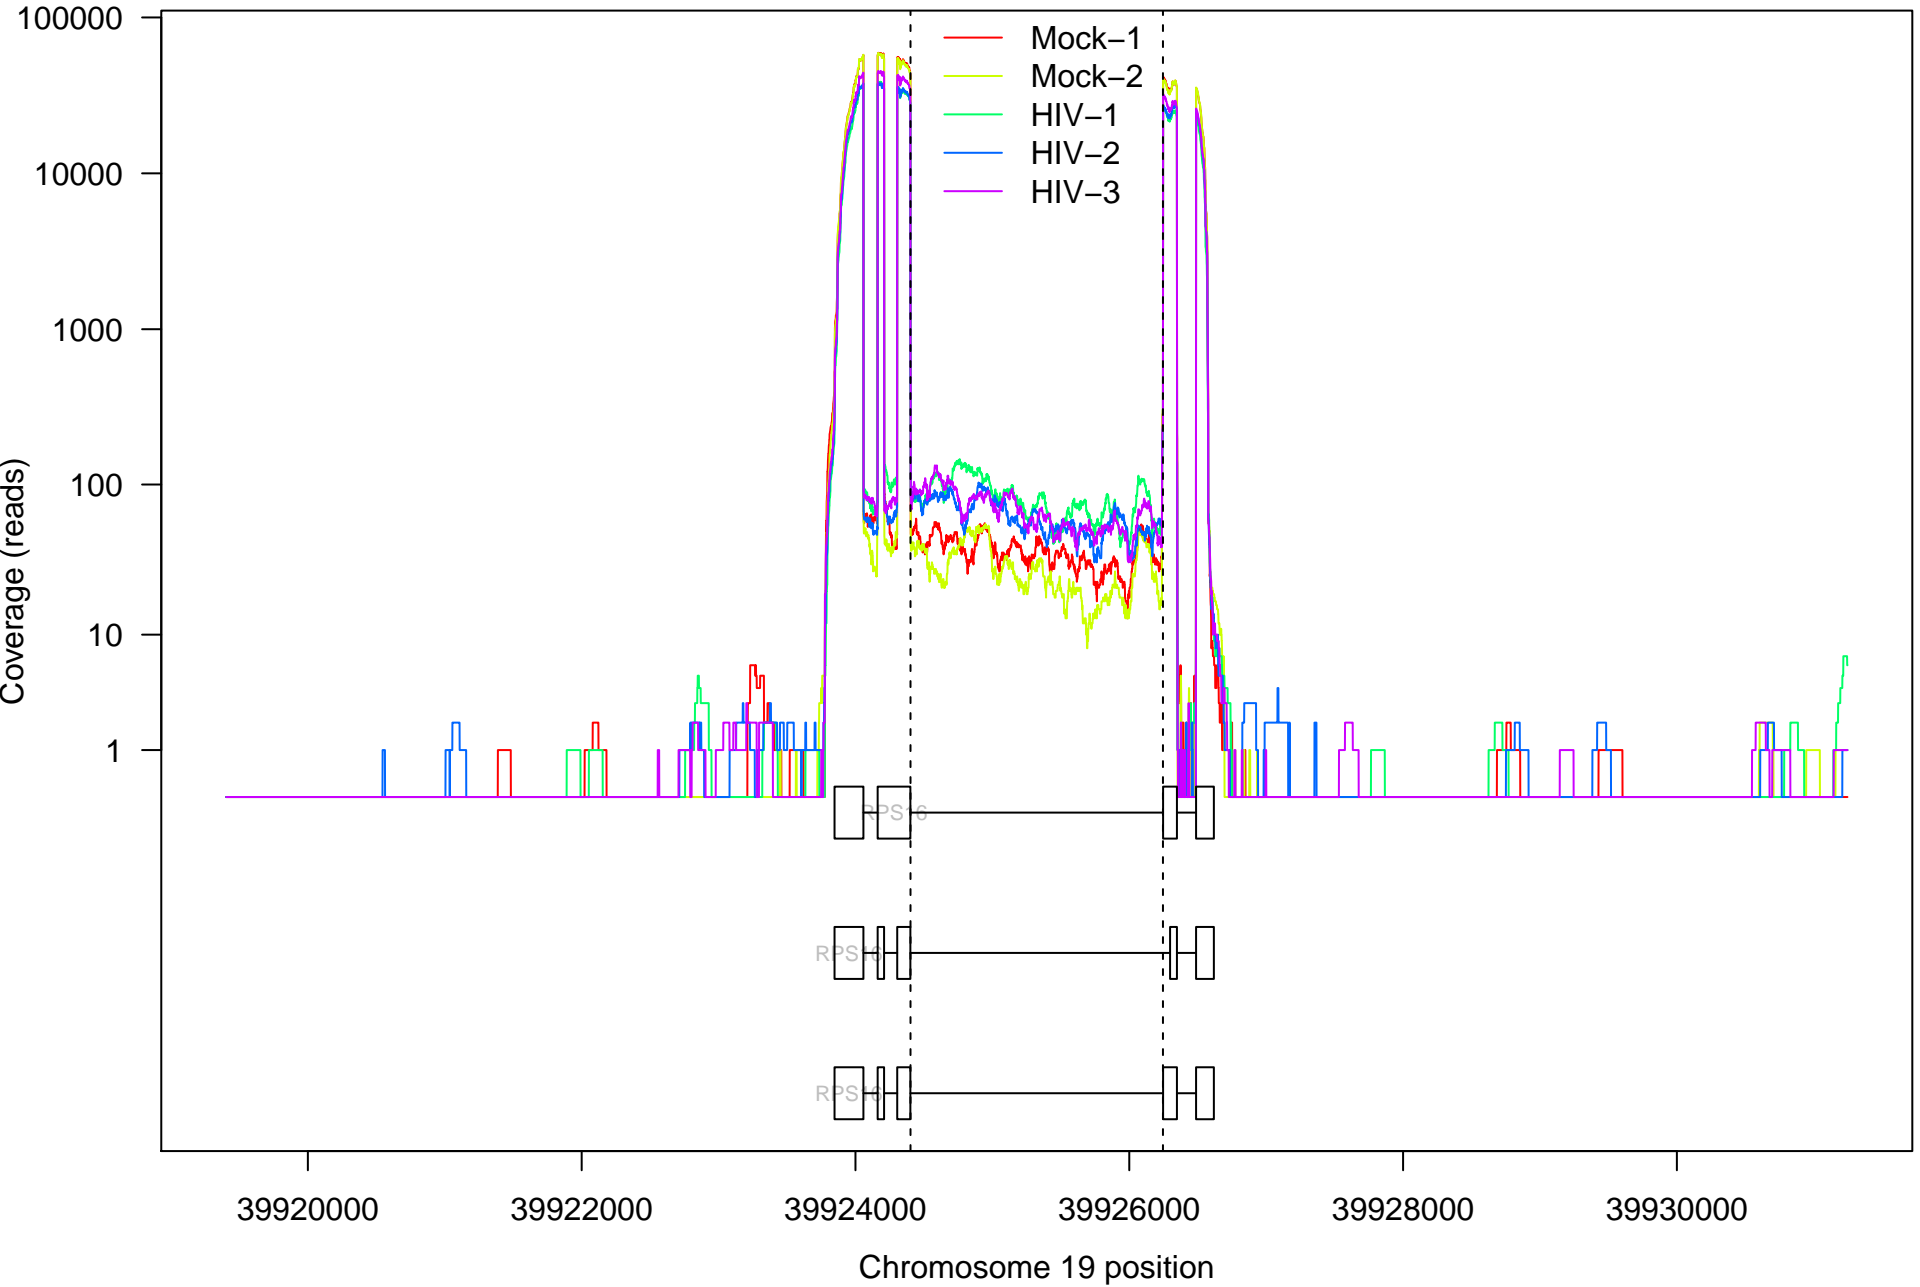



A.49

chr17:27049918-27050446

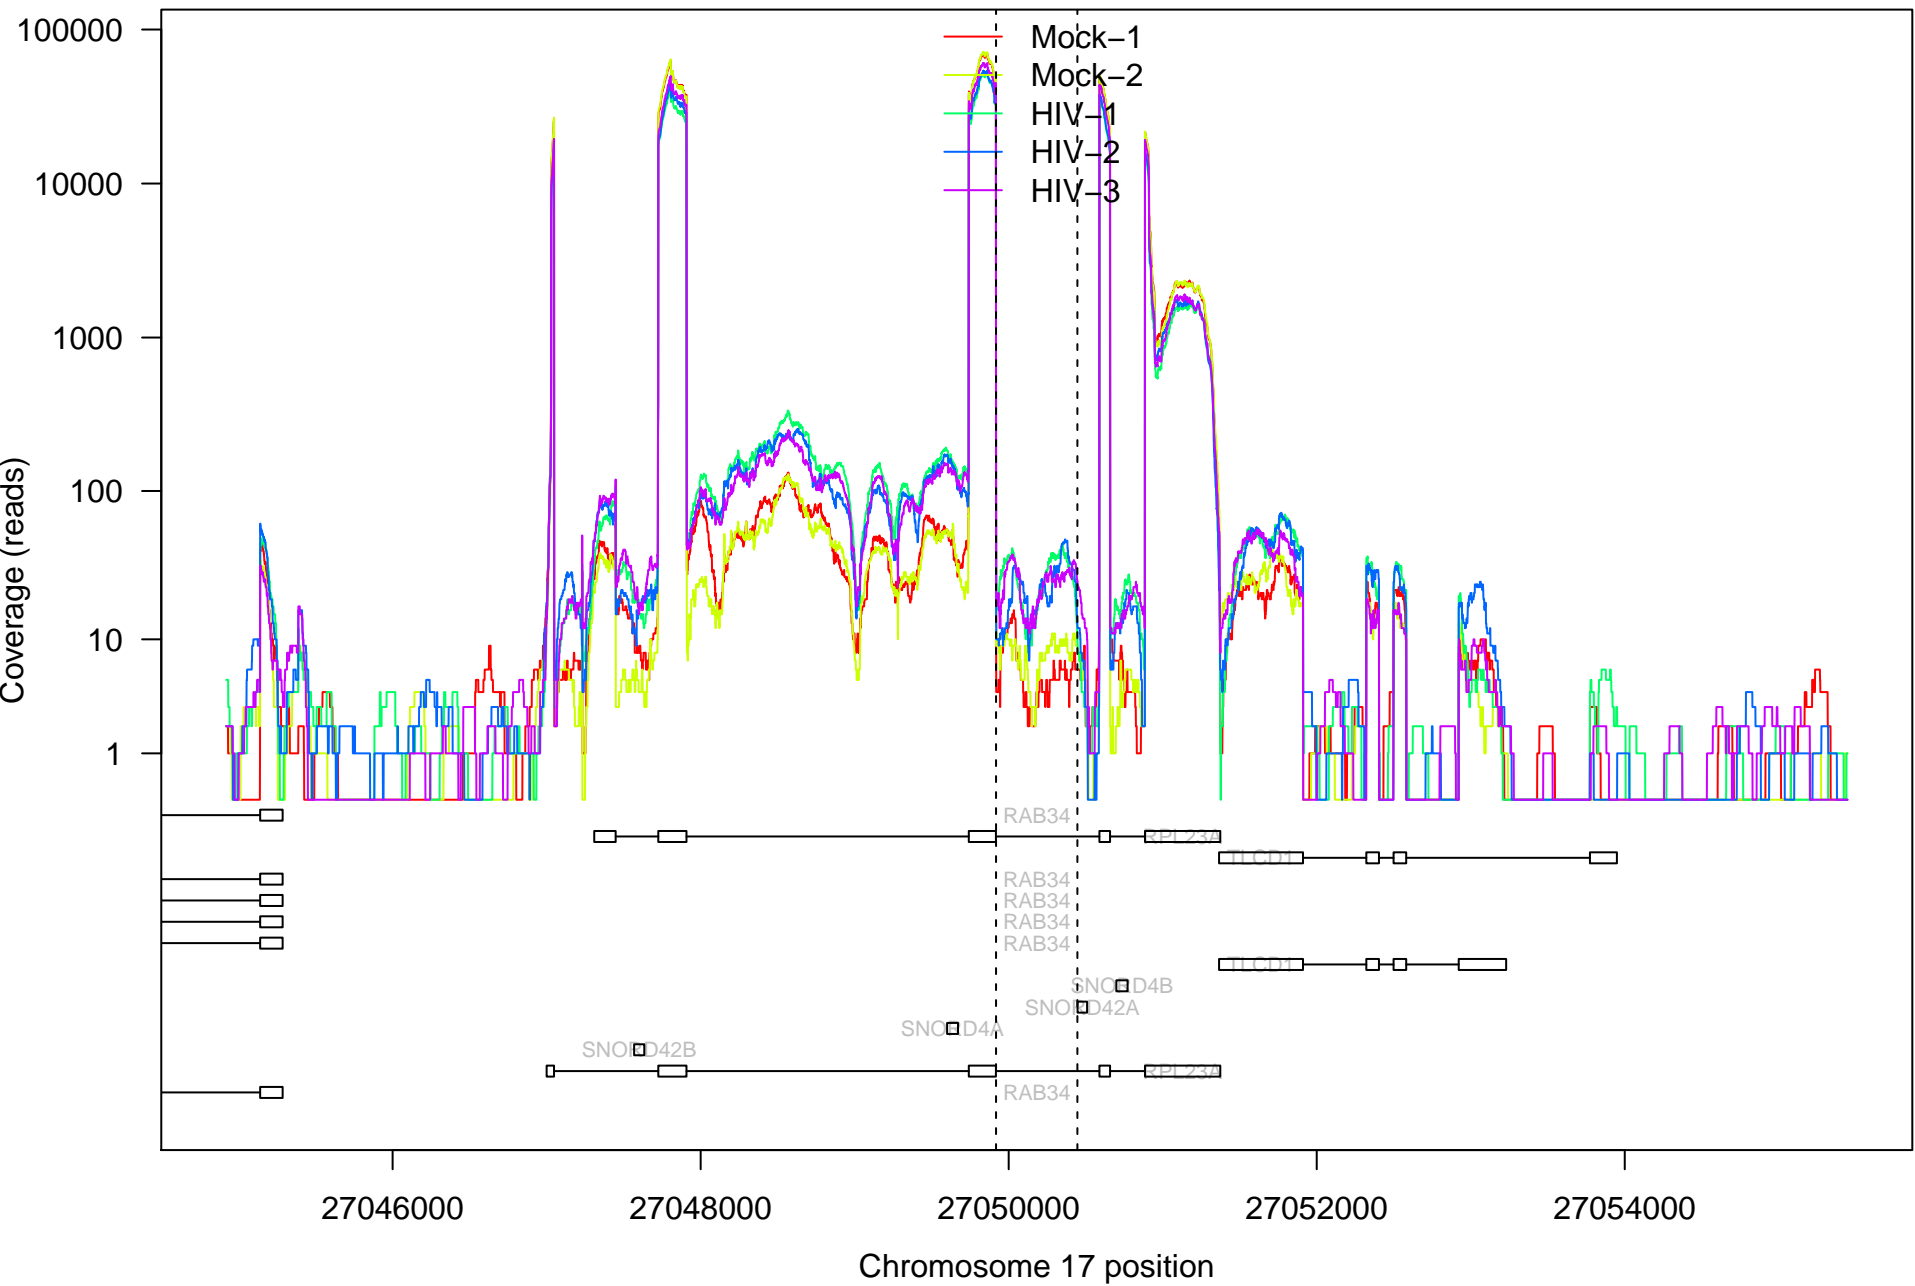

A.50

## chr9:136215898-136216250

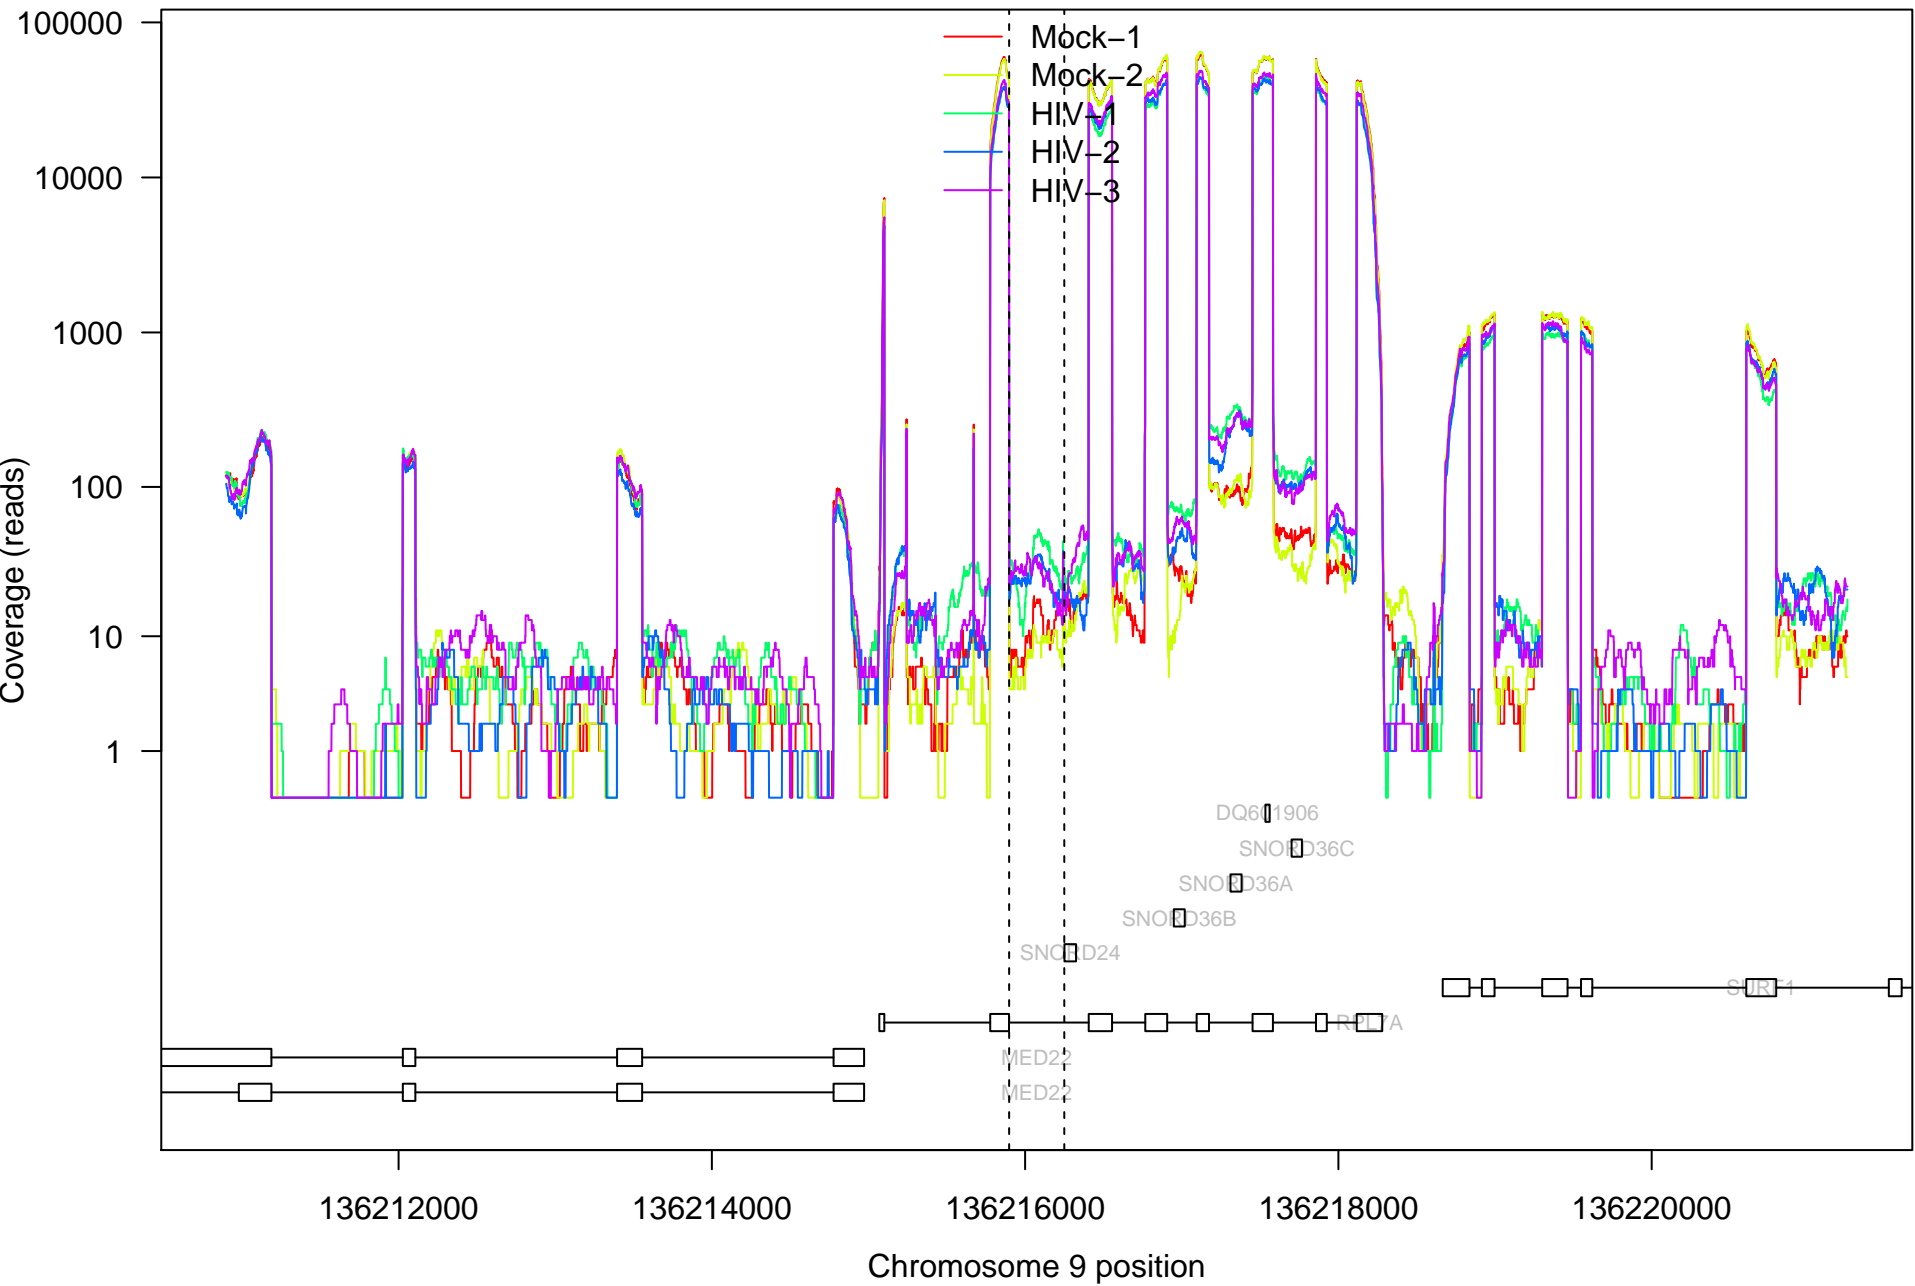

B.1

chr17:45133790-45135214

Proportion of positions observed

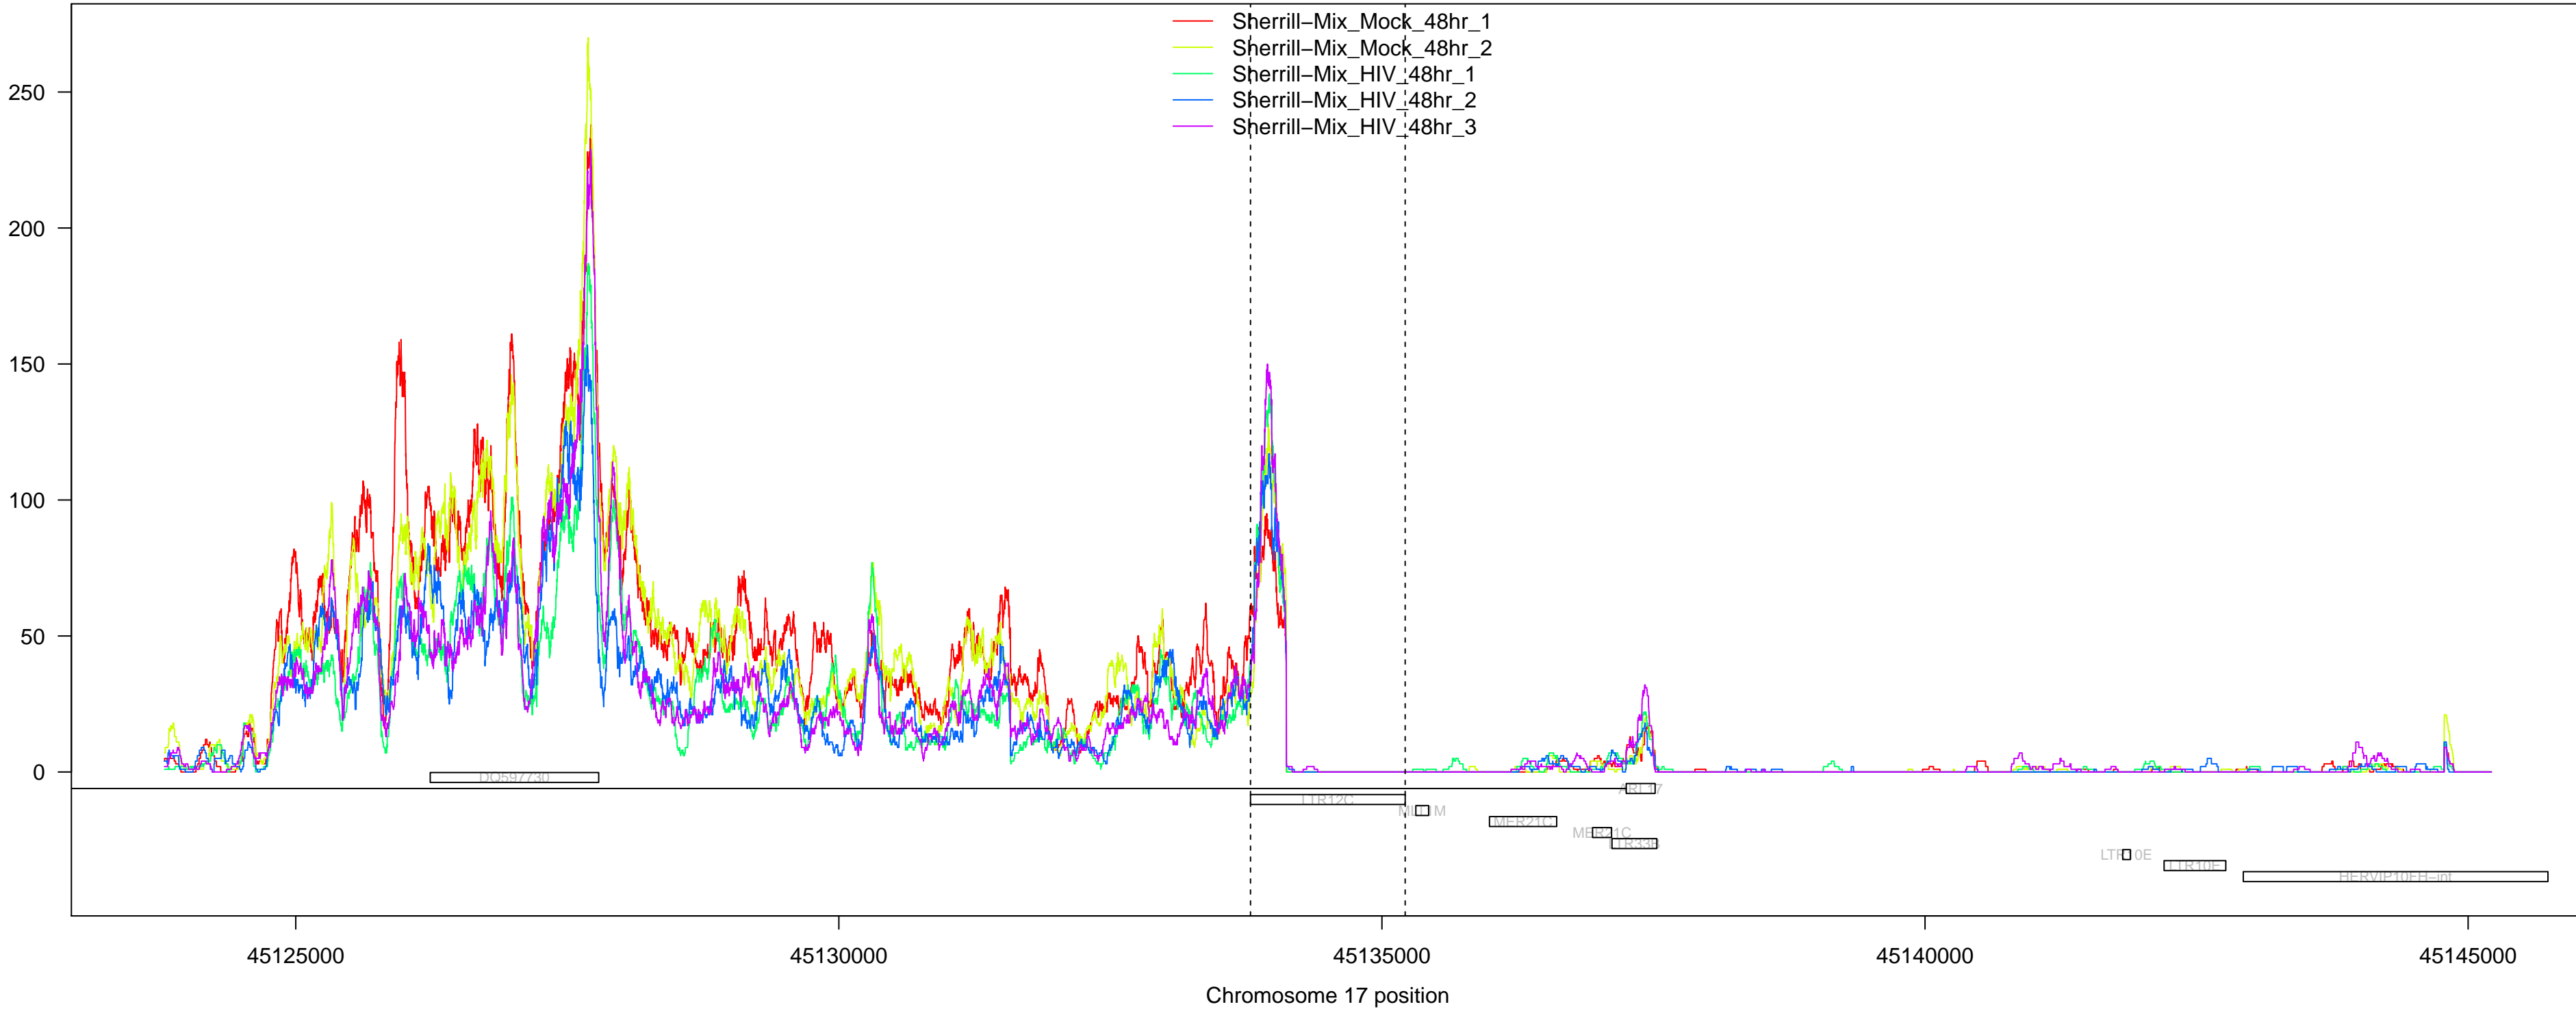

B.2

chr12:123897795-123899225

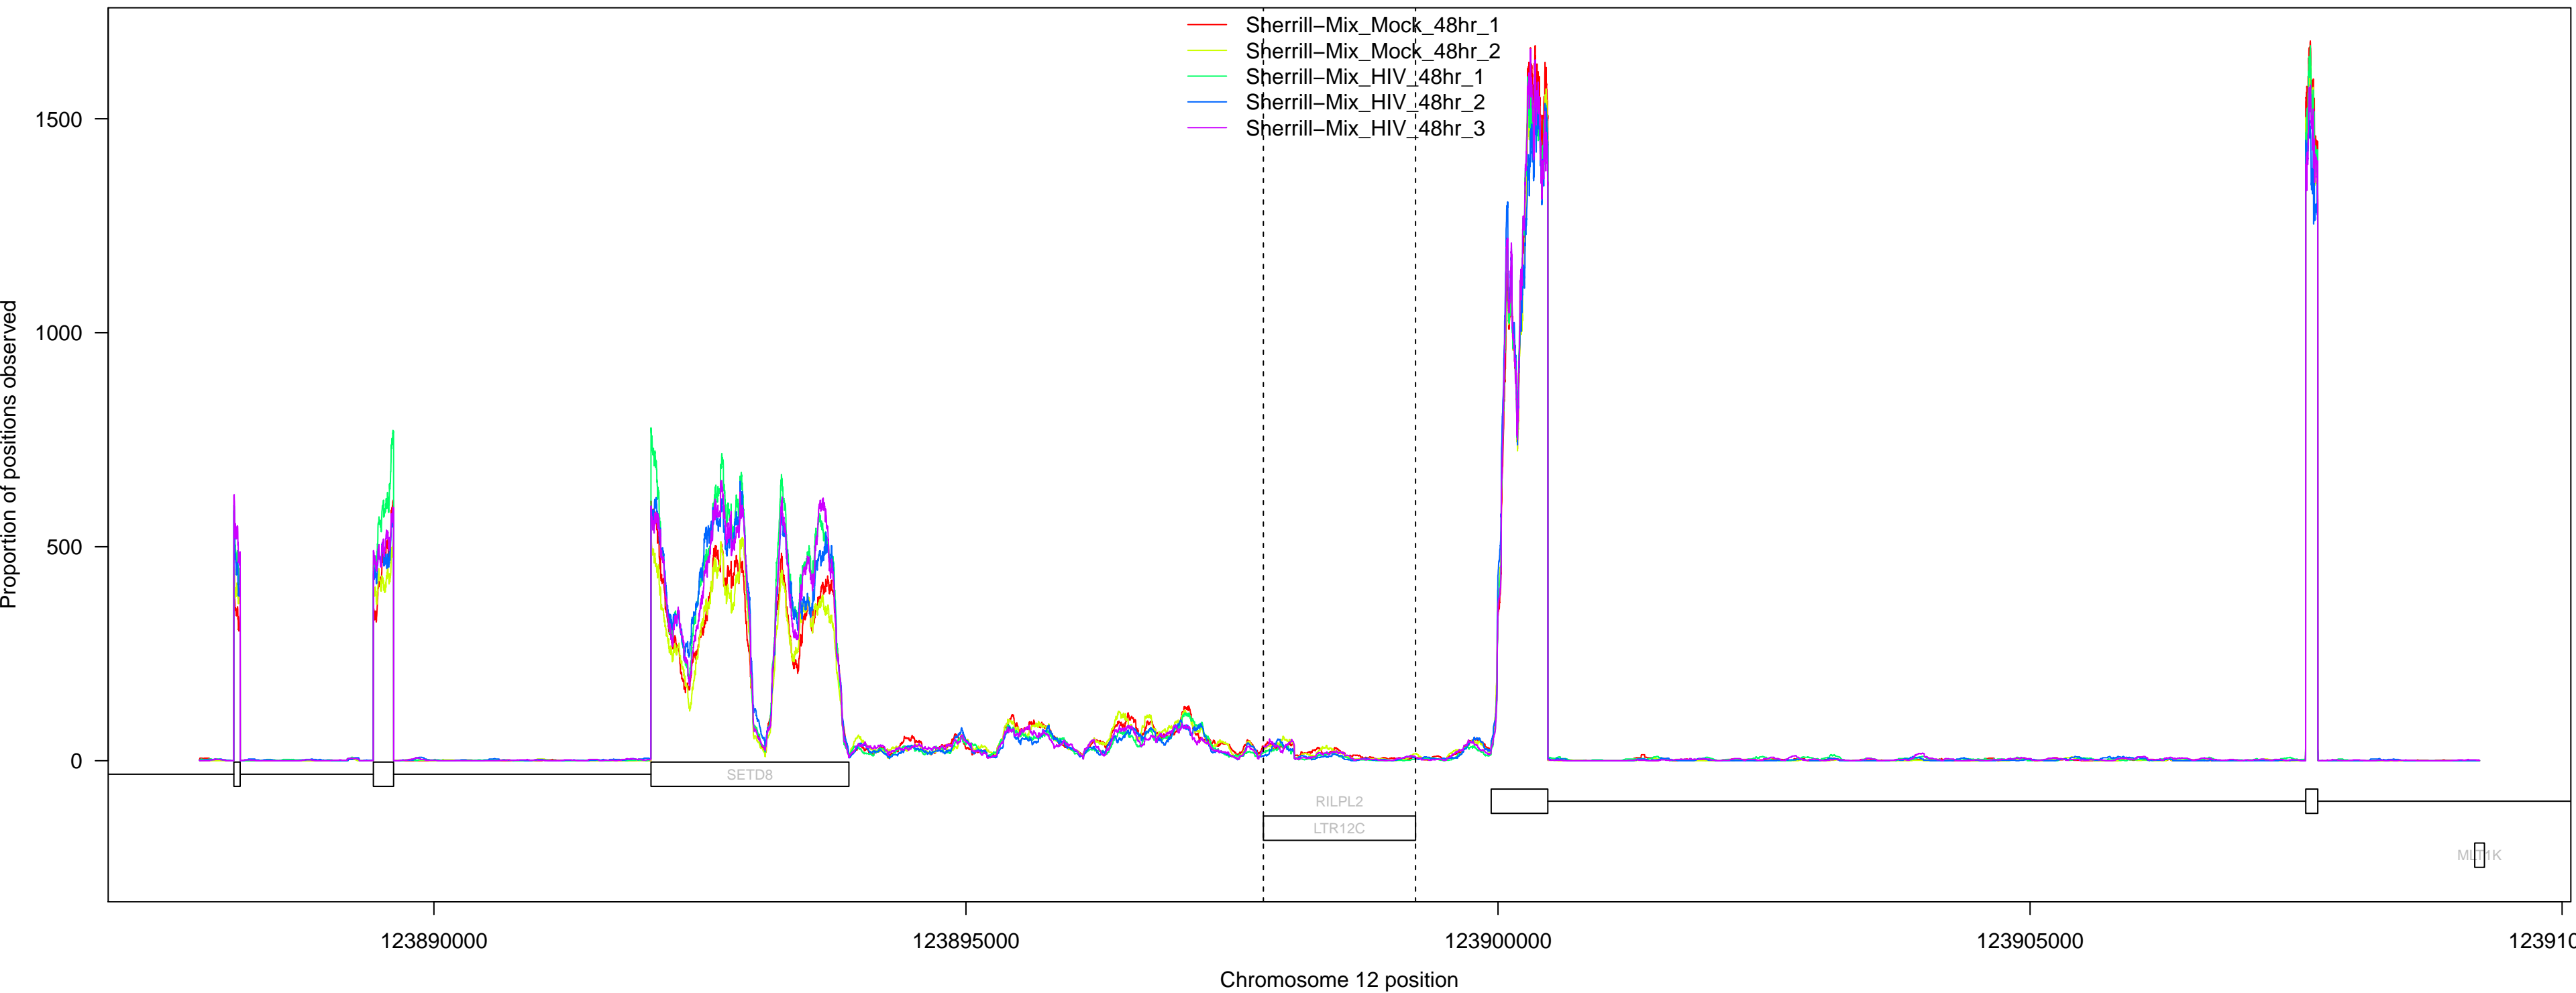

B.3

chr19:12051085-12052674

Proportion of positions observed

200

150

100

50

0

- Sherrill-Mix\_Mock\_48hr\_1
- Sherrill-Mix\_Mock\_48hr\_2
- Sherrill-Mix\_HIV\_48hr\_1
- Sherrill-Mix\_HIV\_48hr\_2
- Sherrill-Mix\_HIV\_48hr\_3

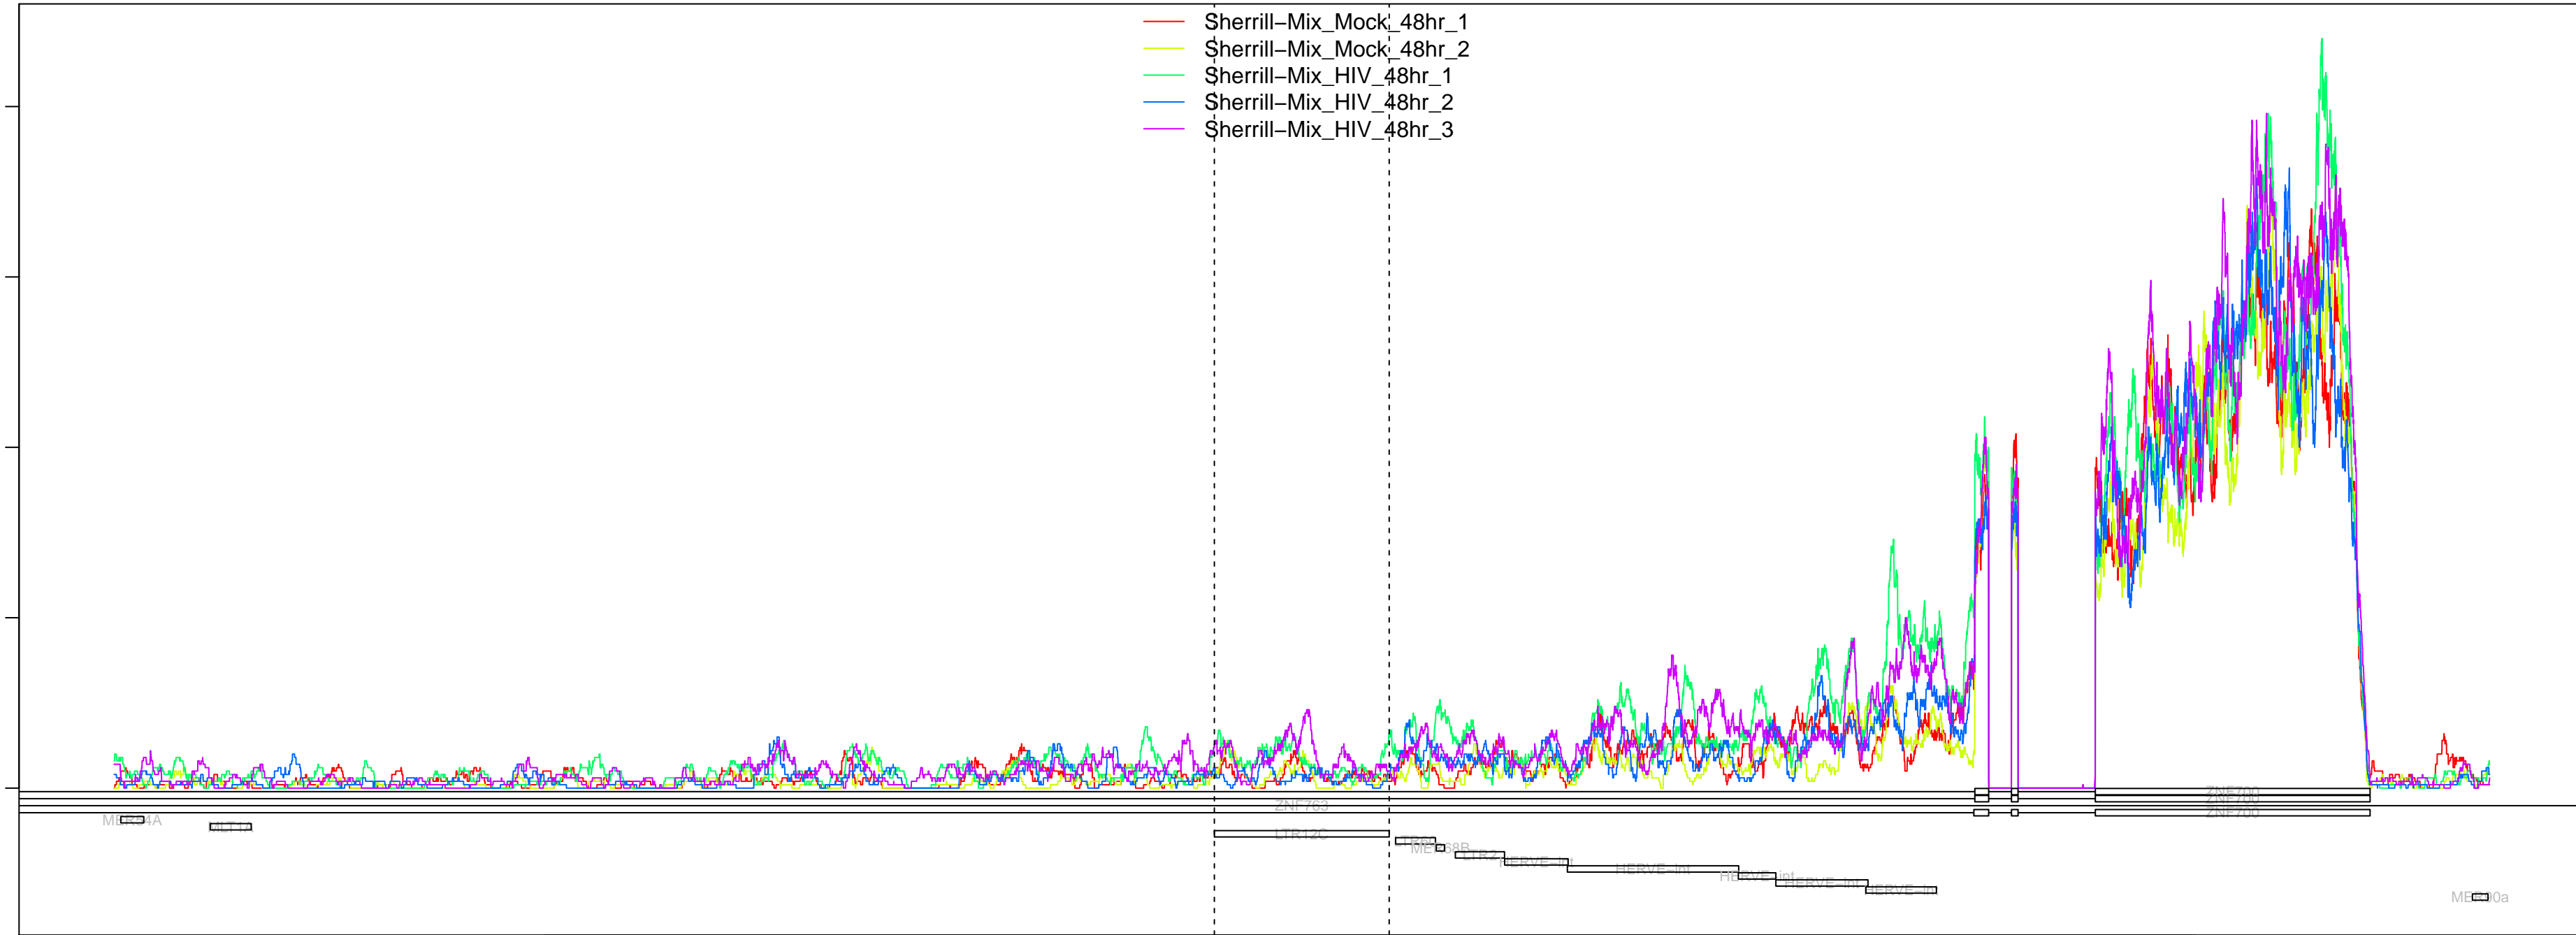

12045000

12050000

12055000

12060000

Chromosome 19 position

MEI4A

ZNF769

LTR12C

MEI88B

HERV10

HERV11

HERV12

HERV13

ZNF700

ZNF701

ZNF702

MEI00a

B.4

chr12:123076388-123077767

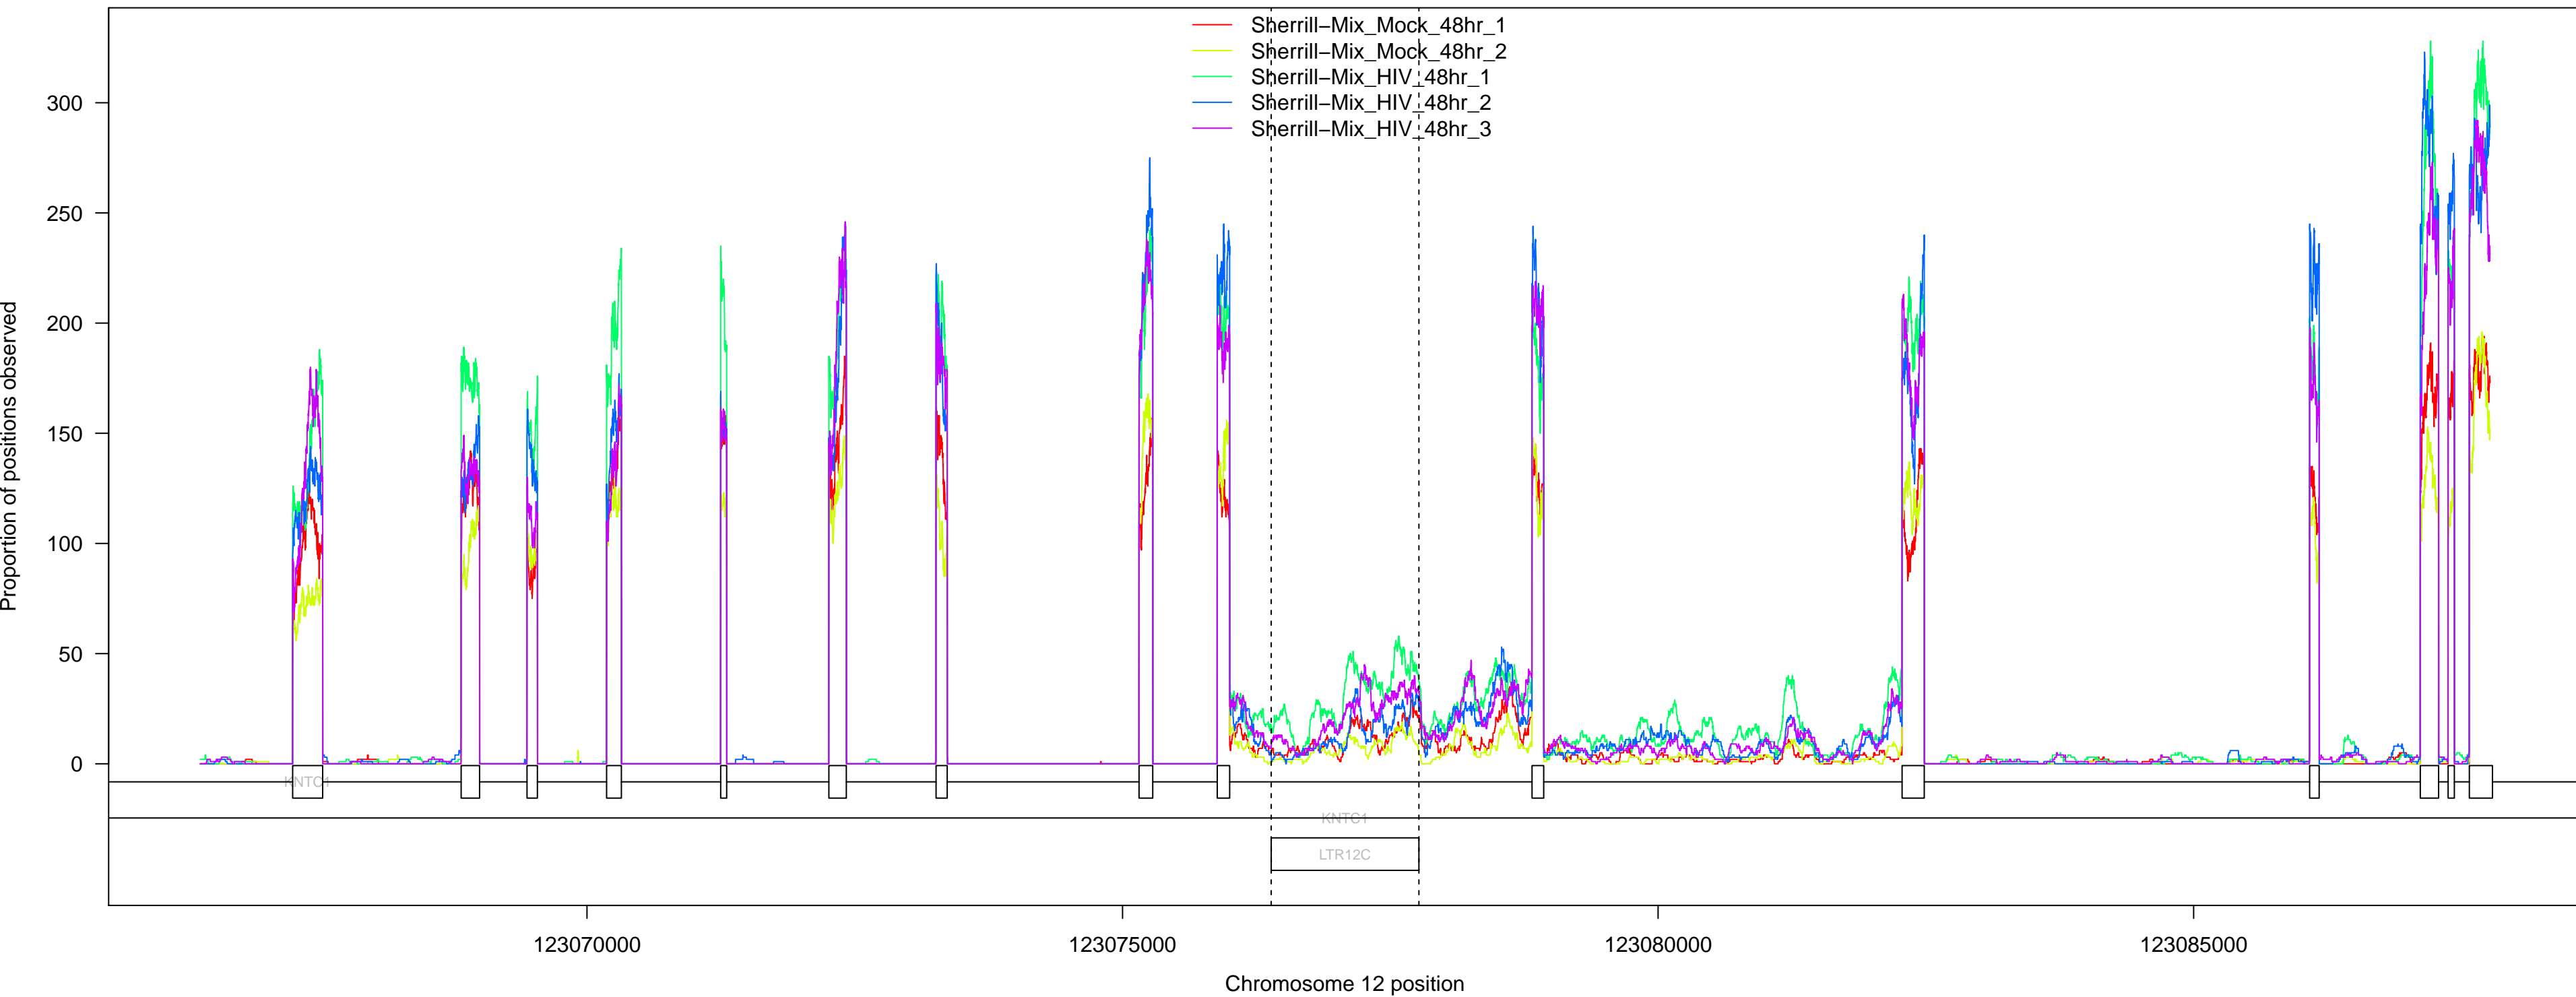

B.5

chr11:58299252-58300713

Proportion of positions observed

- Sherrill-Mix\_Mock\_48hr\_1
- Sherrill-Mix\_Mock\_48hr\_2
- Sherrill-Mix\_HIV\_48hr\_1
- Sherrill-Mix\_HIV\_48hr\_2
- Sherrill-Mix\_HIV\_48hr\_3

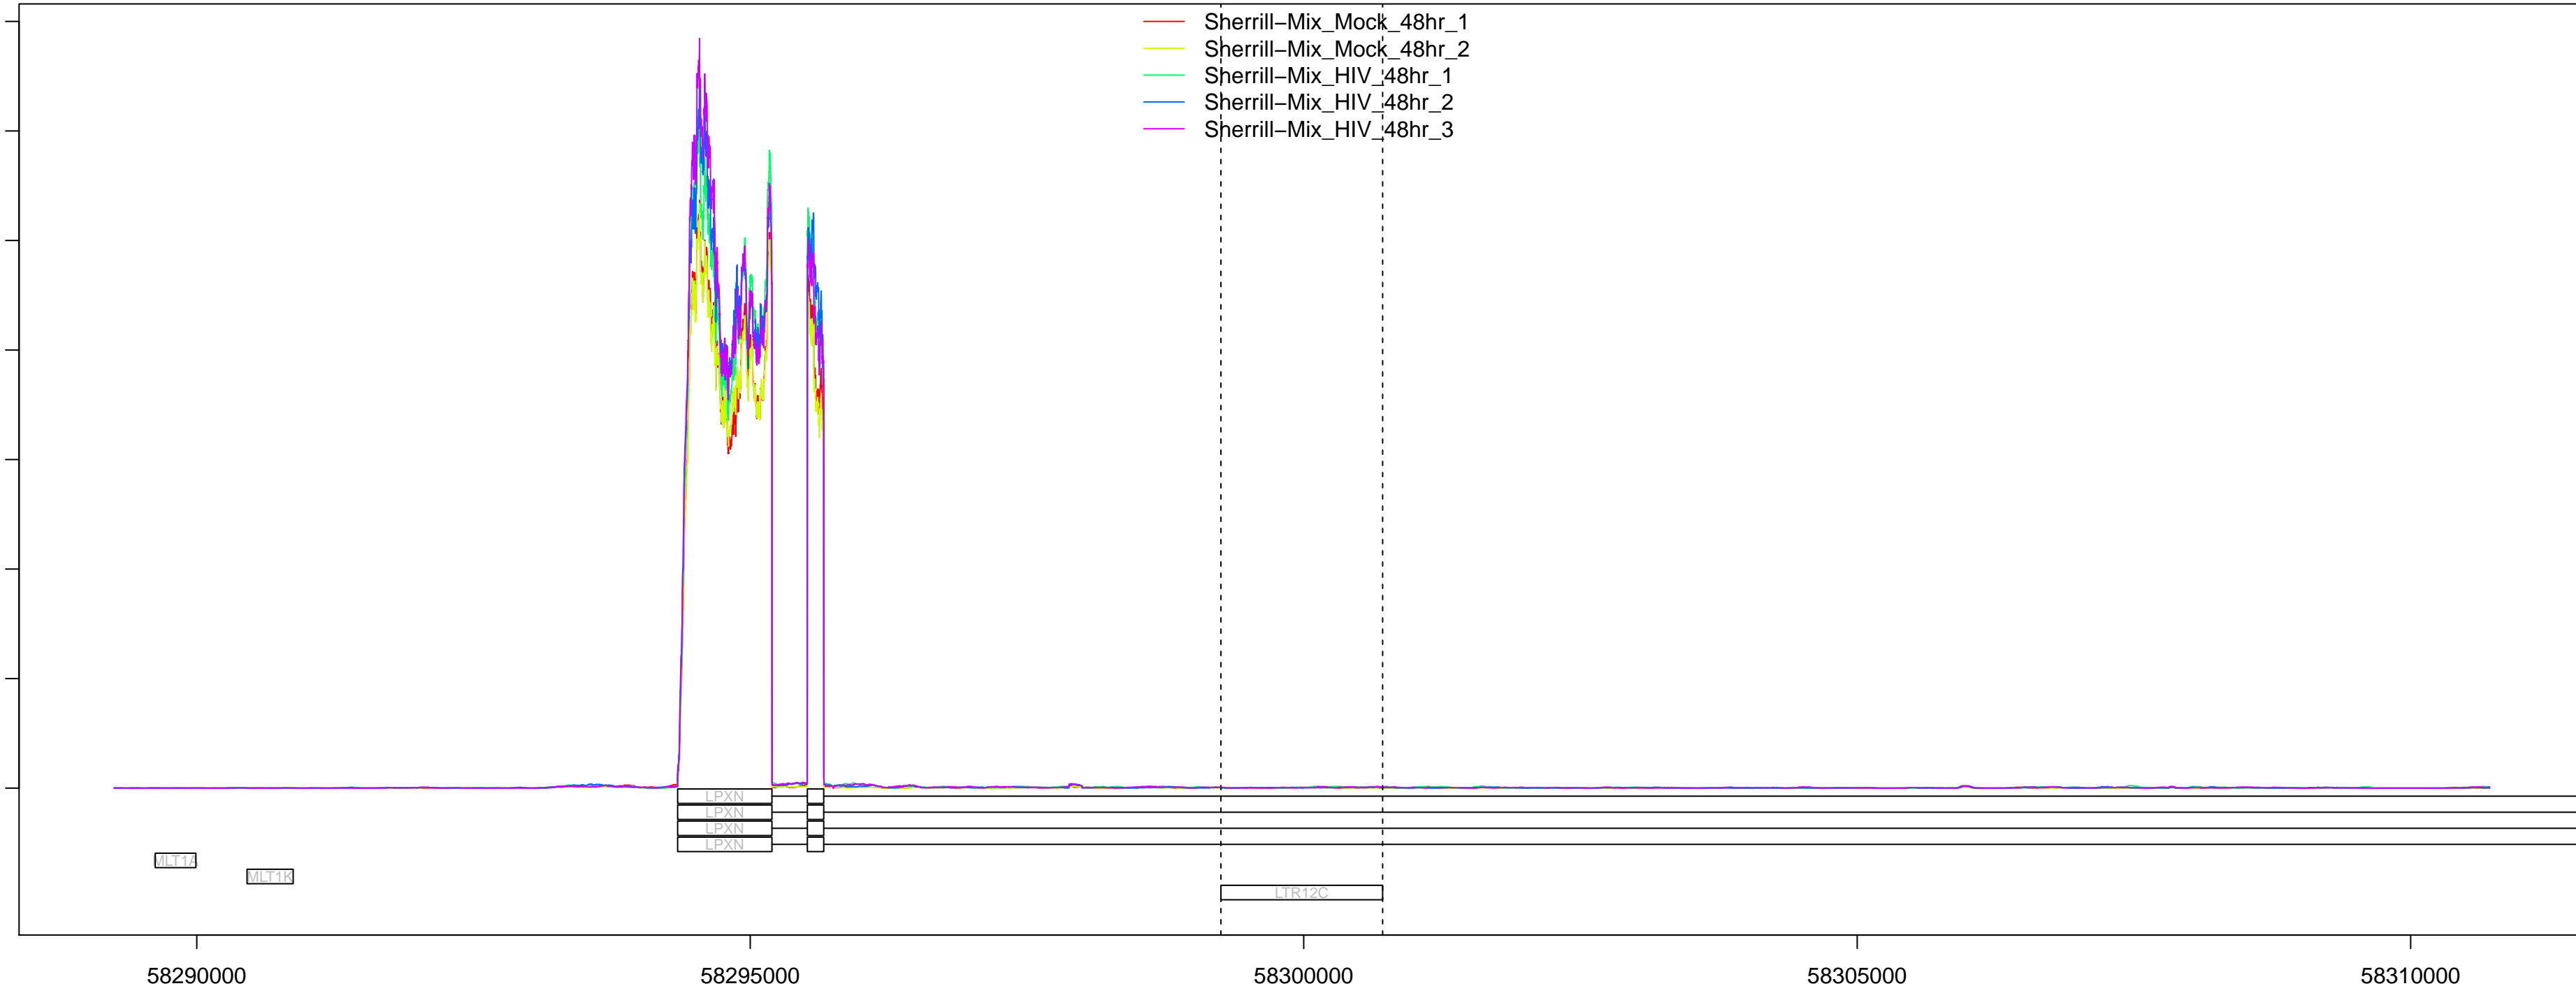

58290000

58295000

58300000

58305000

58310000

Chromosome 11 position

B.6

chr4:6674268-6675474

Proportion of positions observed

700  
600  
500  
400  
300  
200  
100  
0

- Sherrill-Mix\_Mock\_48hr\_1
- Sherrill-Mix\_Mock\_48hr\_2
- Sherrill-Mix\_HIV\_48hr\_1
- Sherrill-Mix\_HIV\_48hr\_2
- Sherrill-Mix\_HIV\_48hr\_3

6665000

6670000

6675000

6680000

6685000

Chromosome 4 position

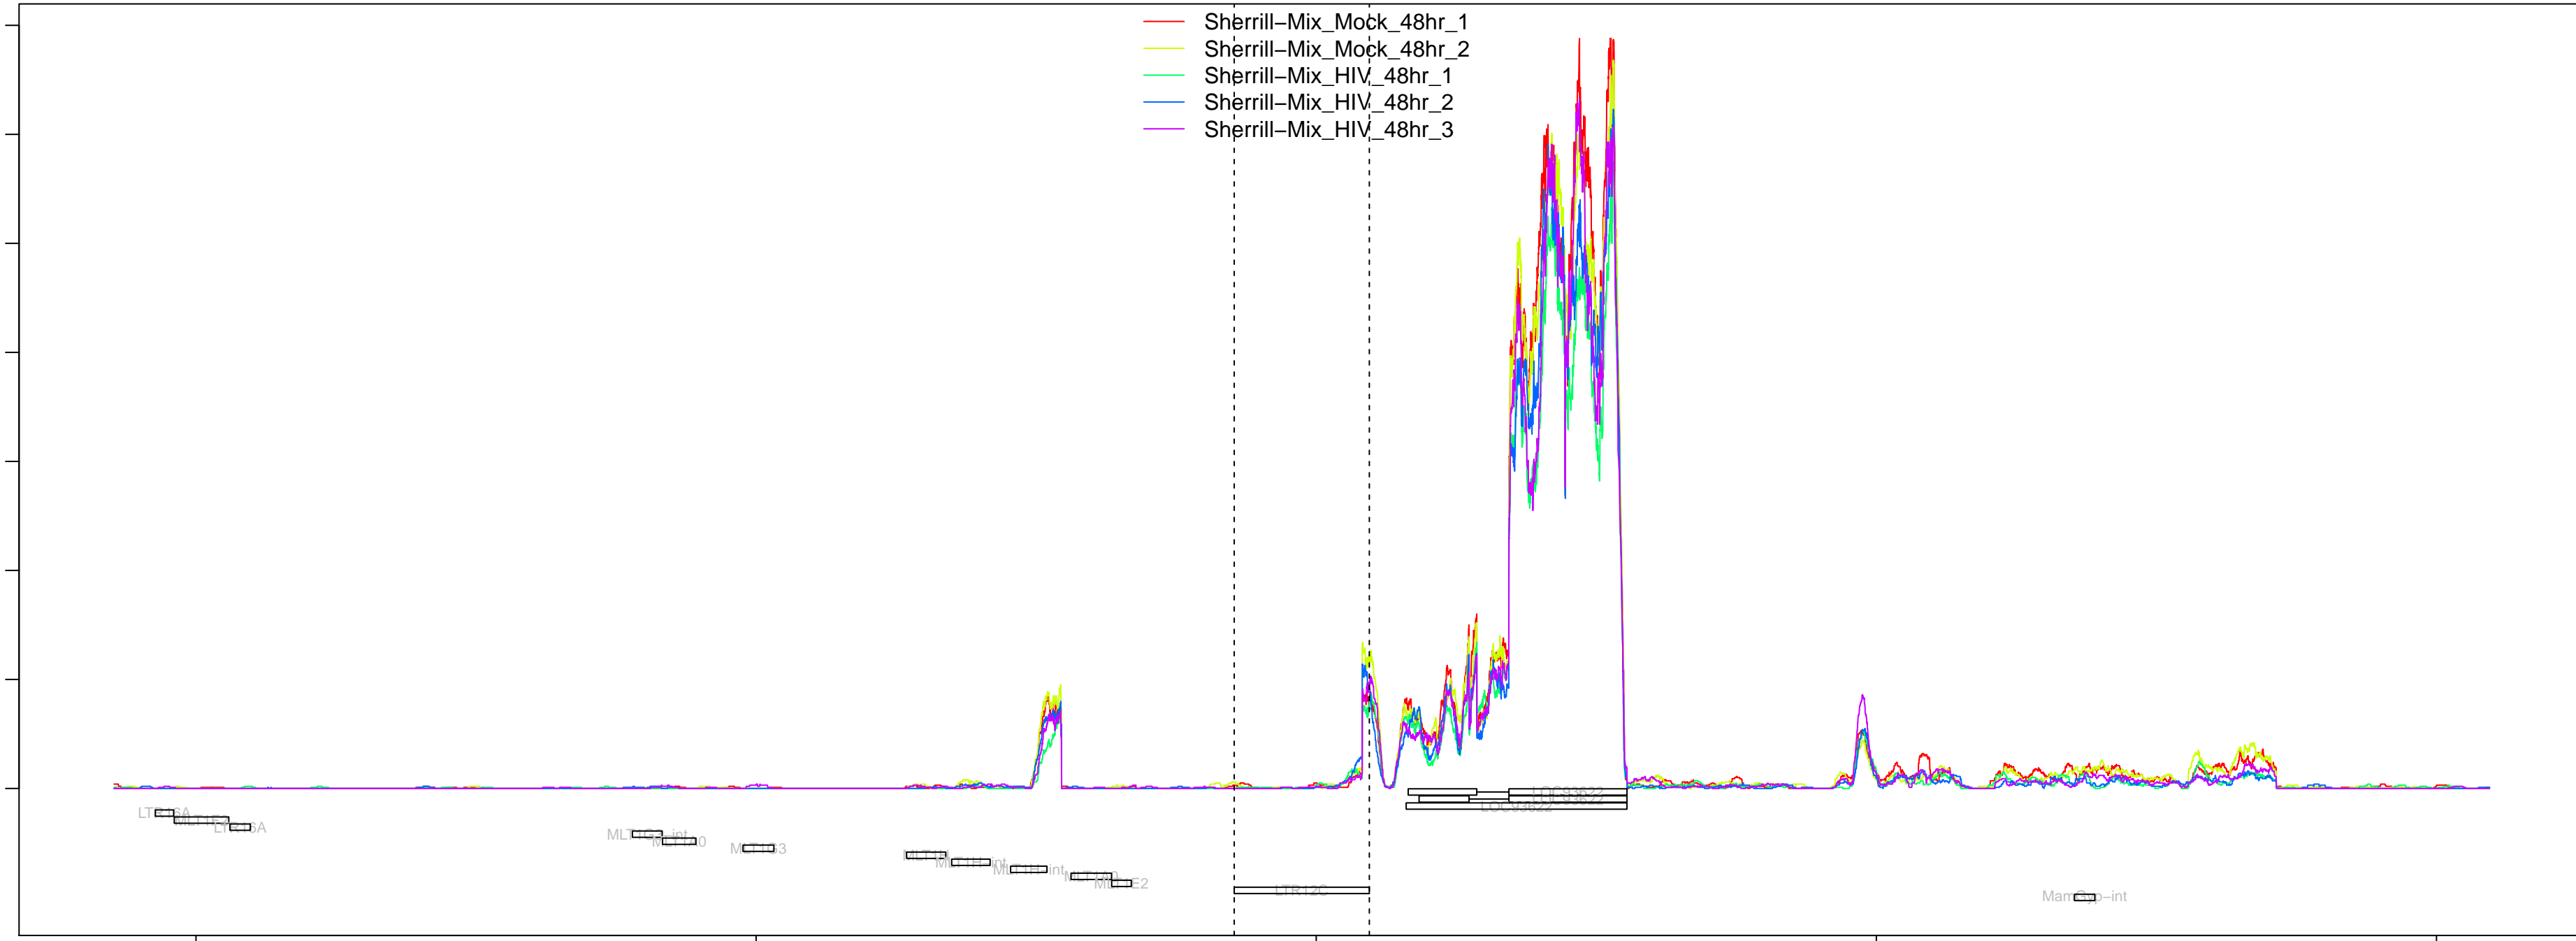



## chr1:119721508-119723014

Proportion of positions observed

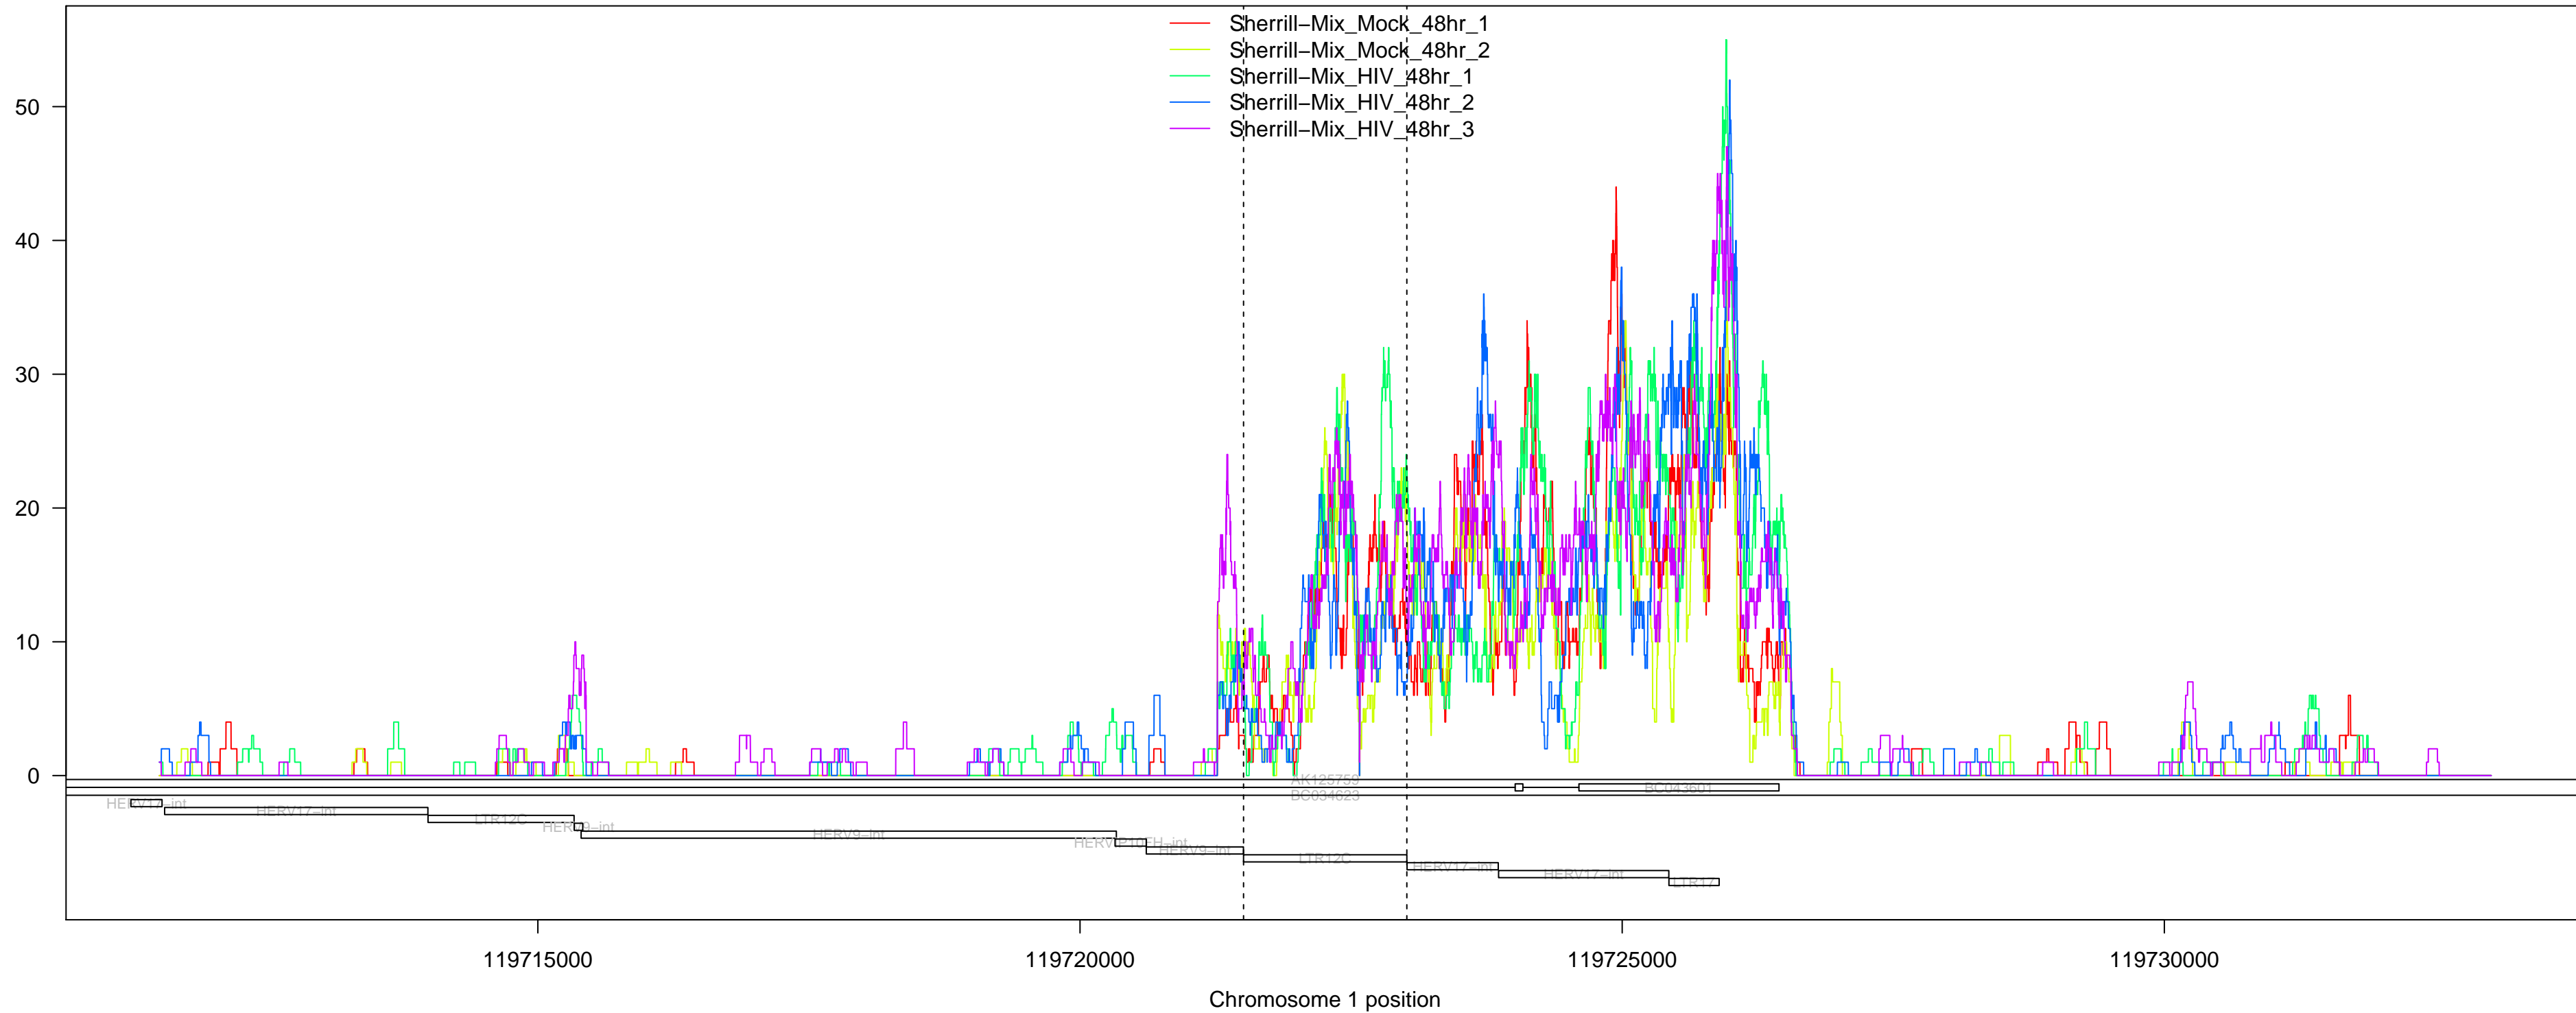

B.8

chr1:40853344-40854827

Proportion of positions observed

- Sherrill-Mix\_Mock\_48hr\_1
- Sherrill-Mix\_Mock\_48hr\_2
- Sherrill-Mix\_HIV\_48hr\_1
- Sherrill-Mix\_HIV\_48hr\_2
- Sherrill-Mix\_HIV\_48hr\_3

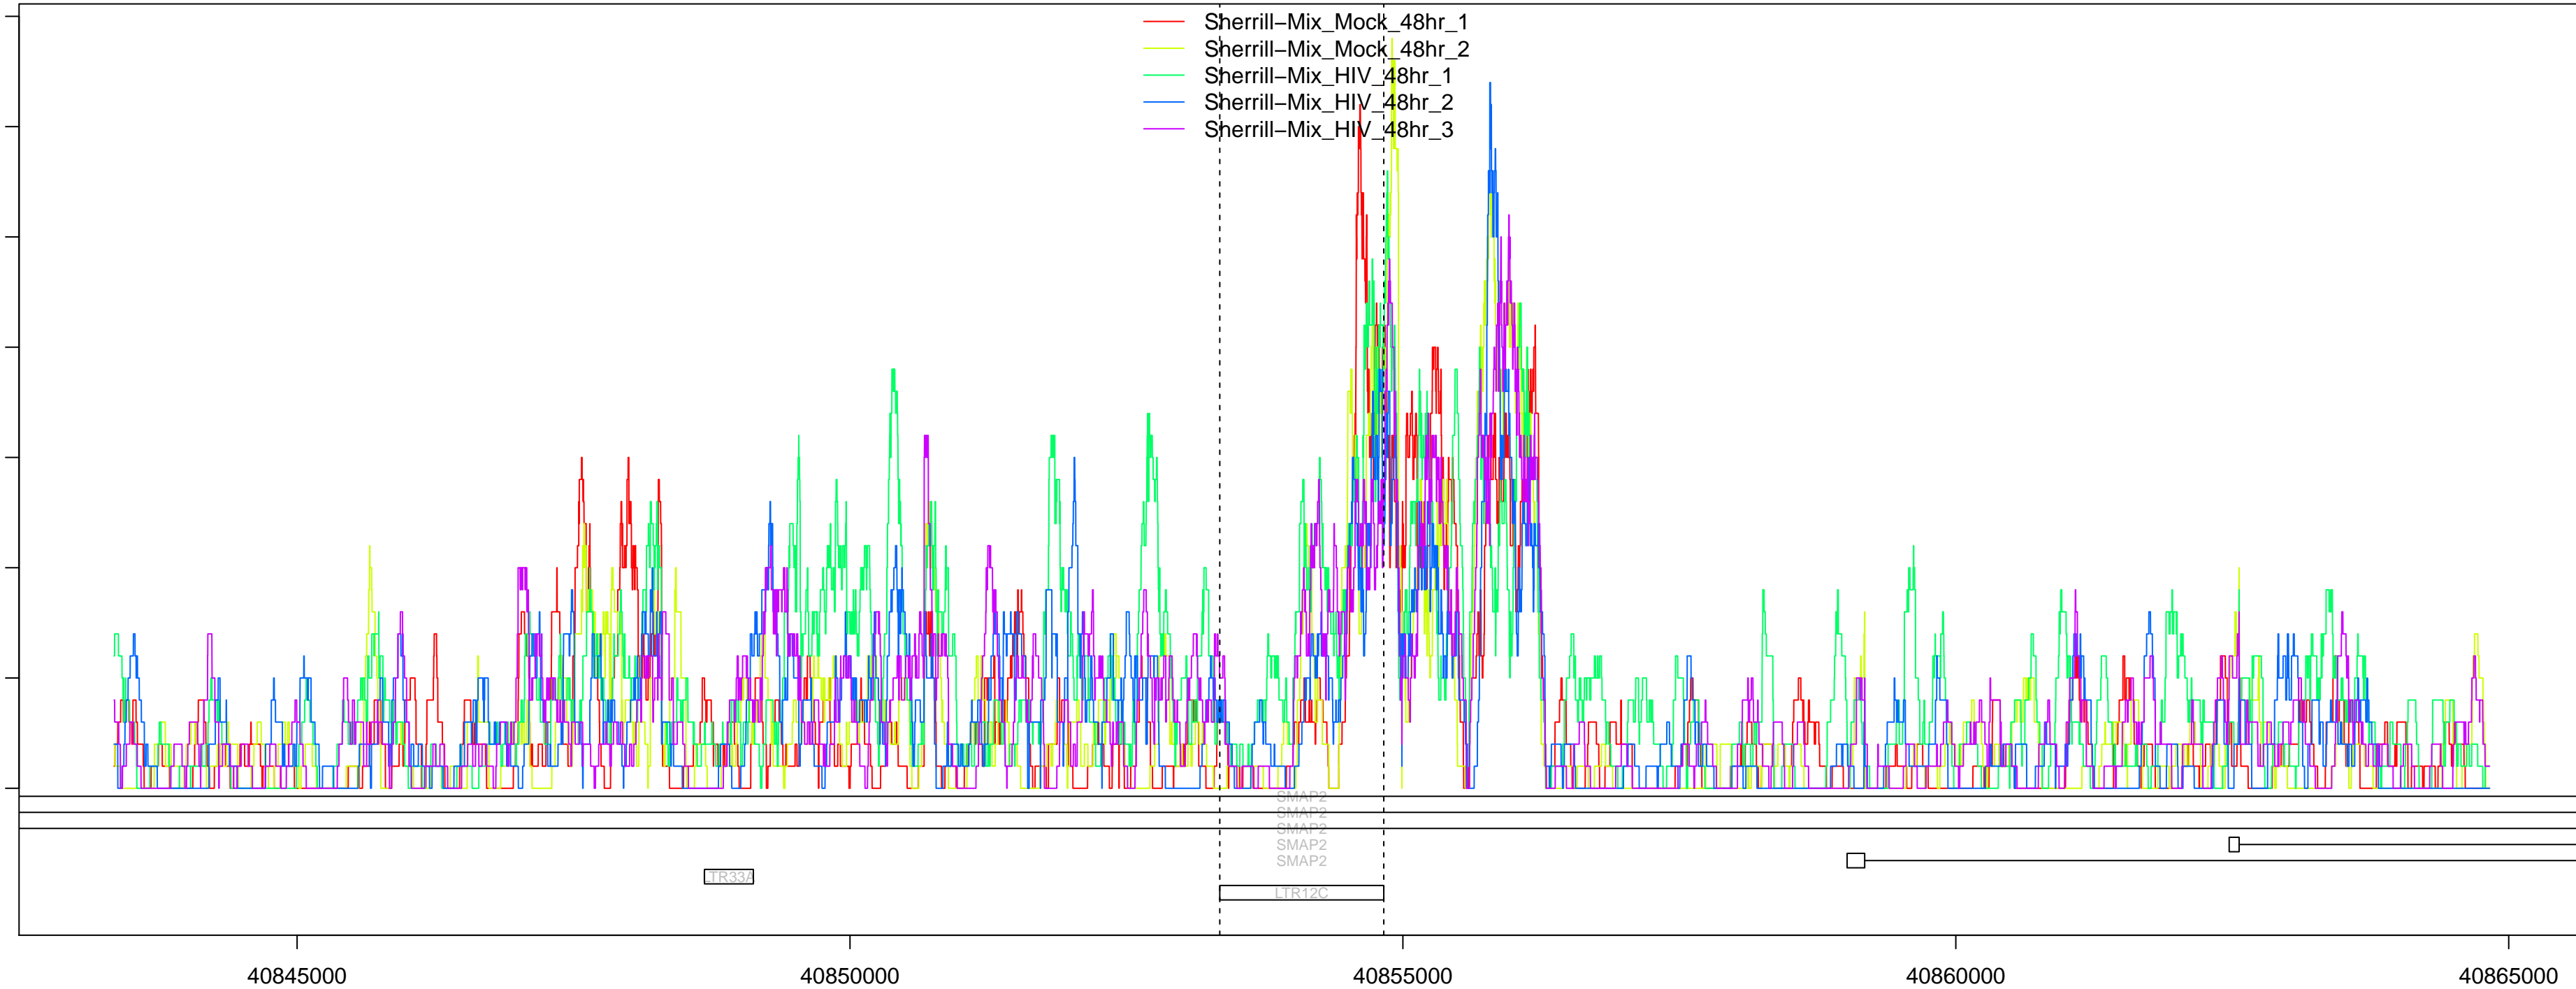

40845000

40850000

40855000

40860000

40865000

Chromosome 1 position

B.9

chr15:80308682-80310142

Proportion of positions observed

- Sherrill-Mix\_Mock\_48hr\_1
- Sherrill-Mix\_Mock\_48hr\_2
- Sherrill-Mix\_HIV\_48hr\_1
- Sherrill-Mix\_HIV\_48hr\_2
- Sherrill-Mix\_HIV\_48hr\_3

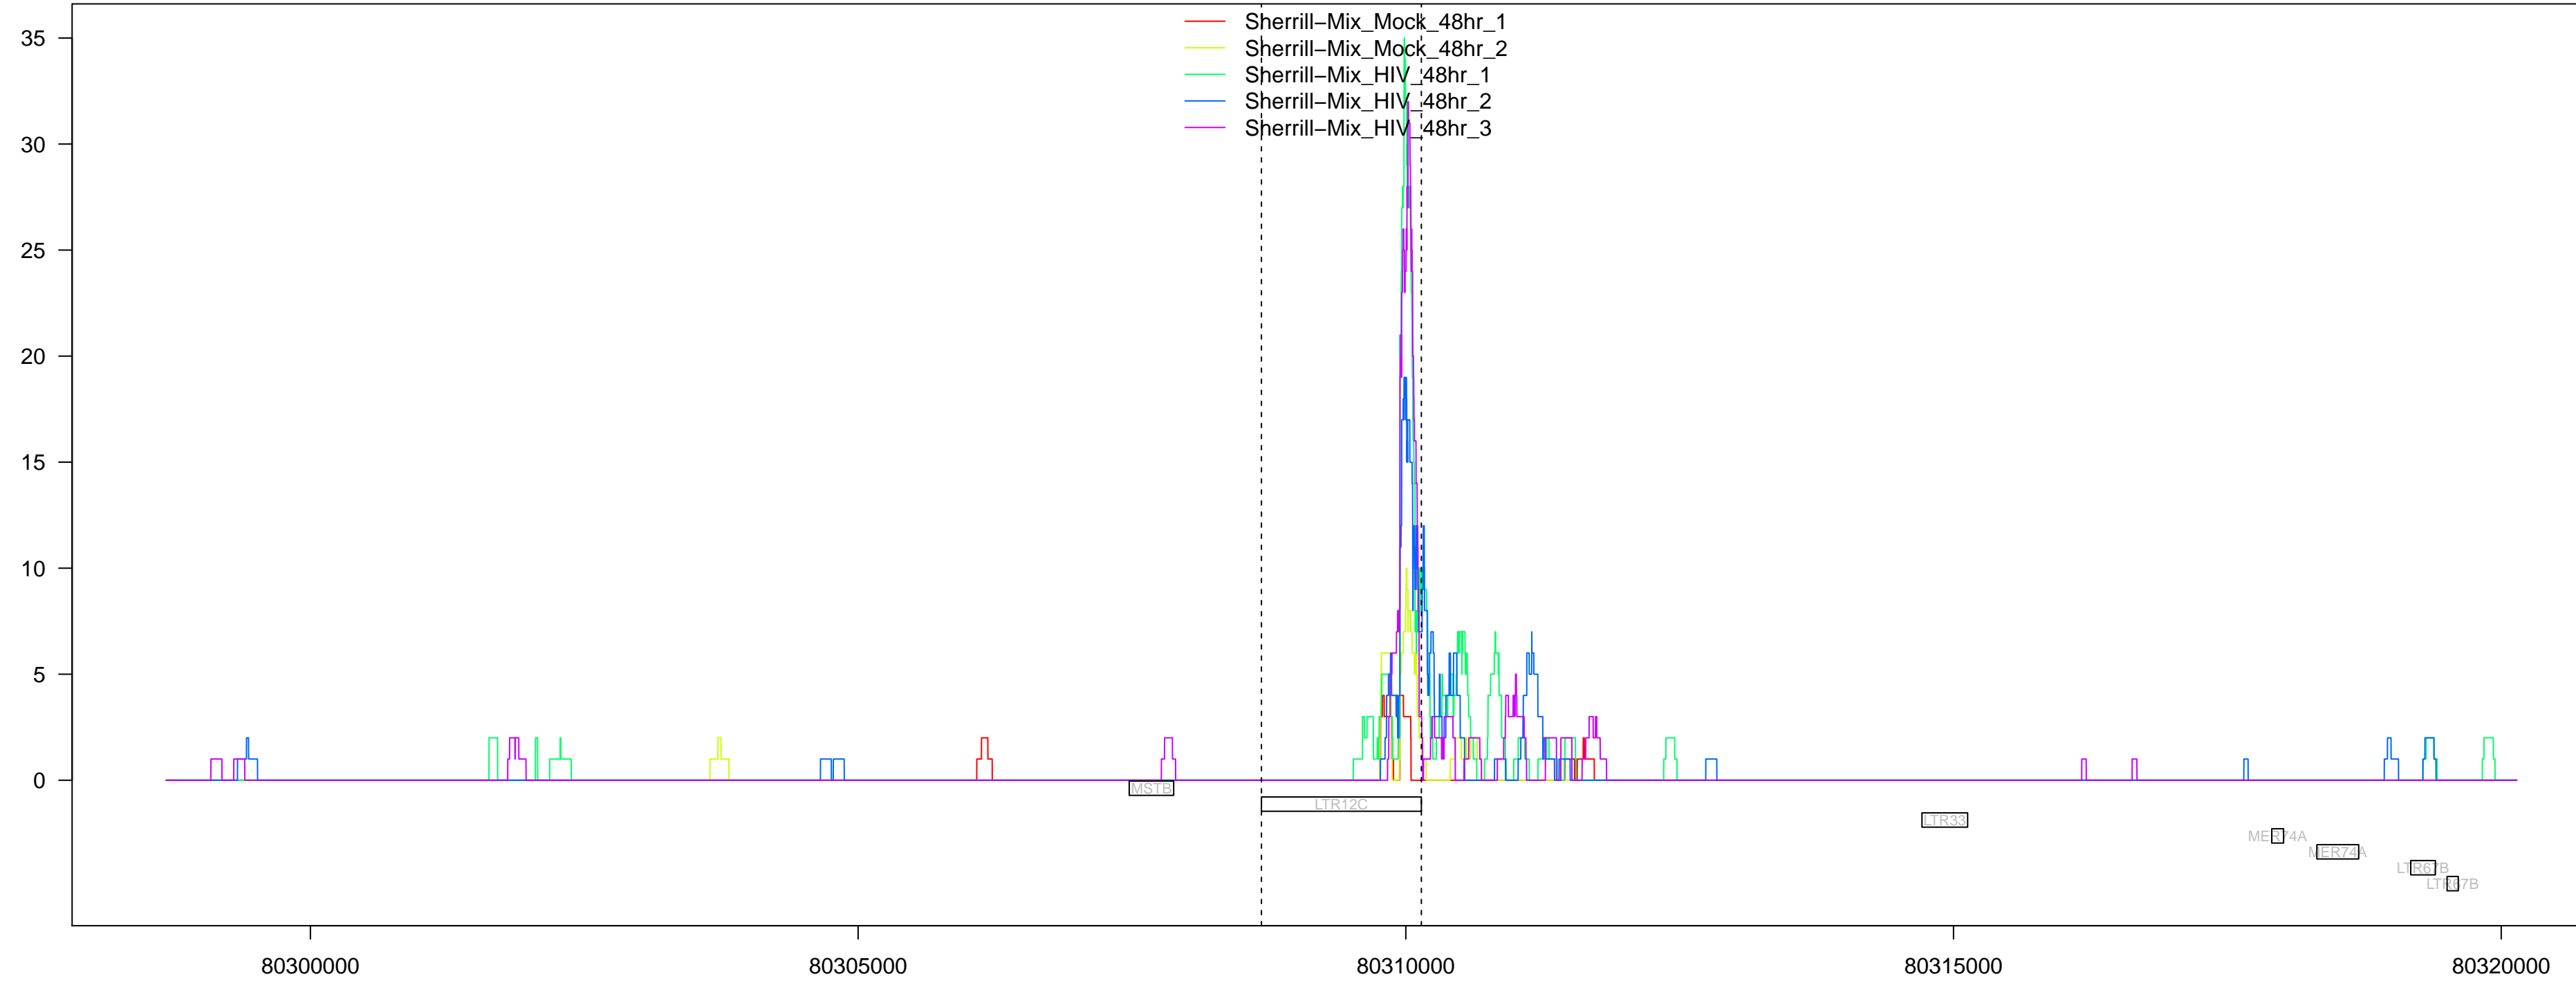

80300000

80305000

80310000

80315000

80320000

Chromosome 15 position

B.10

chr22:42534126-42535686

Proportion of positions observed

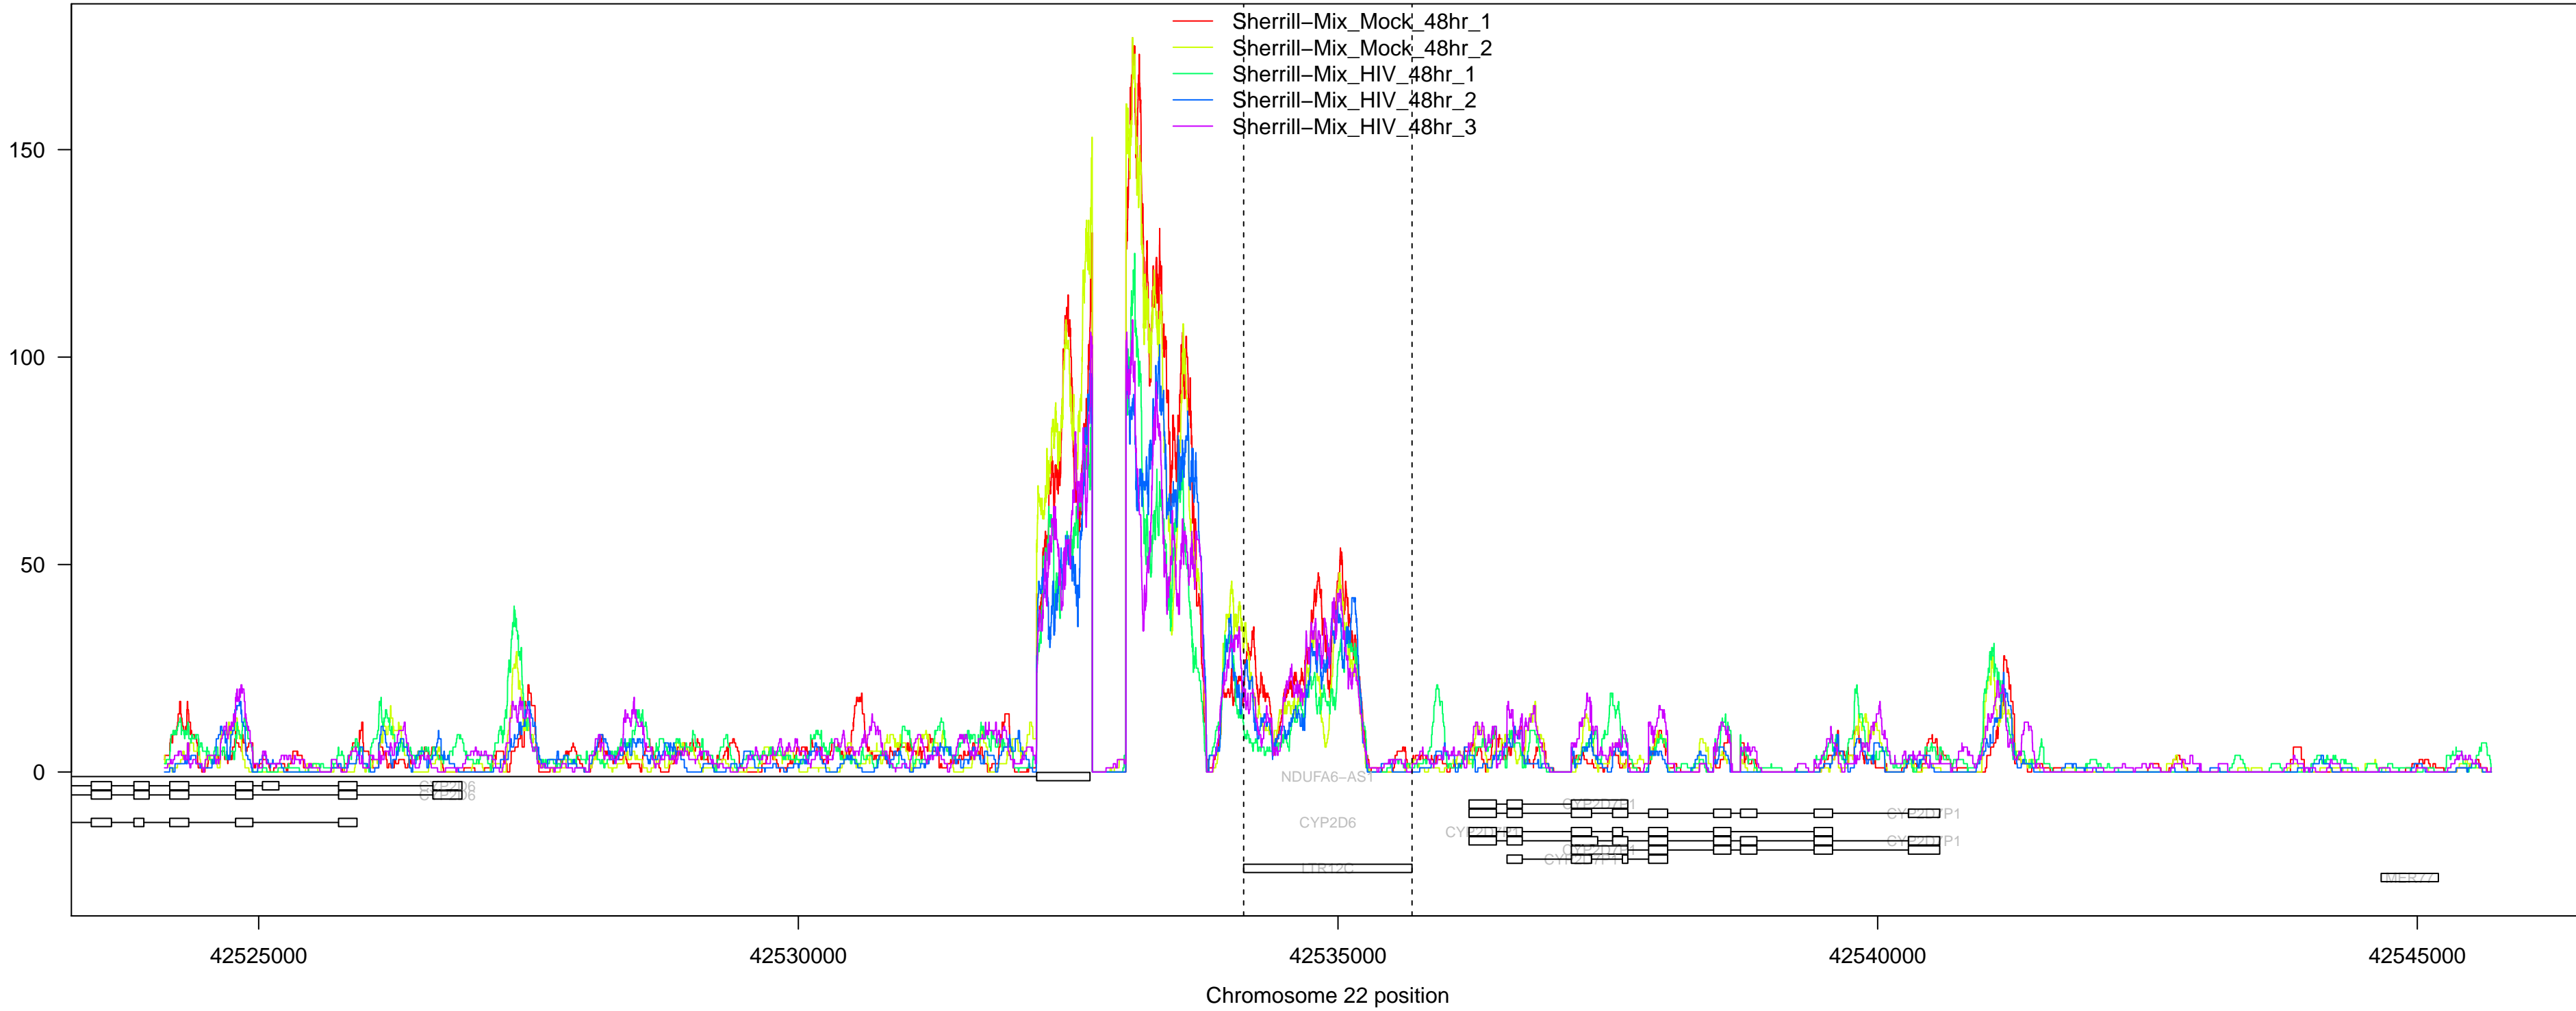

Chromosome 22 position

B.11

chr16:16197677-16199048

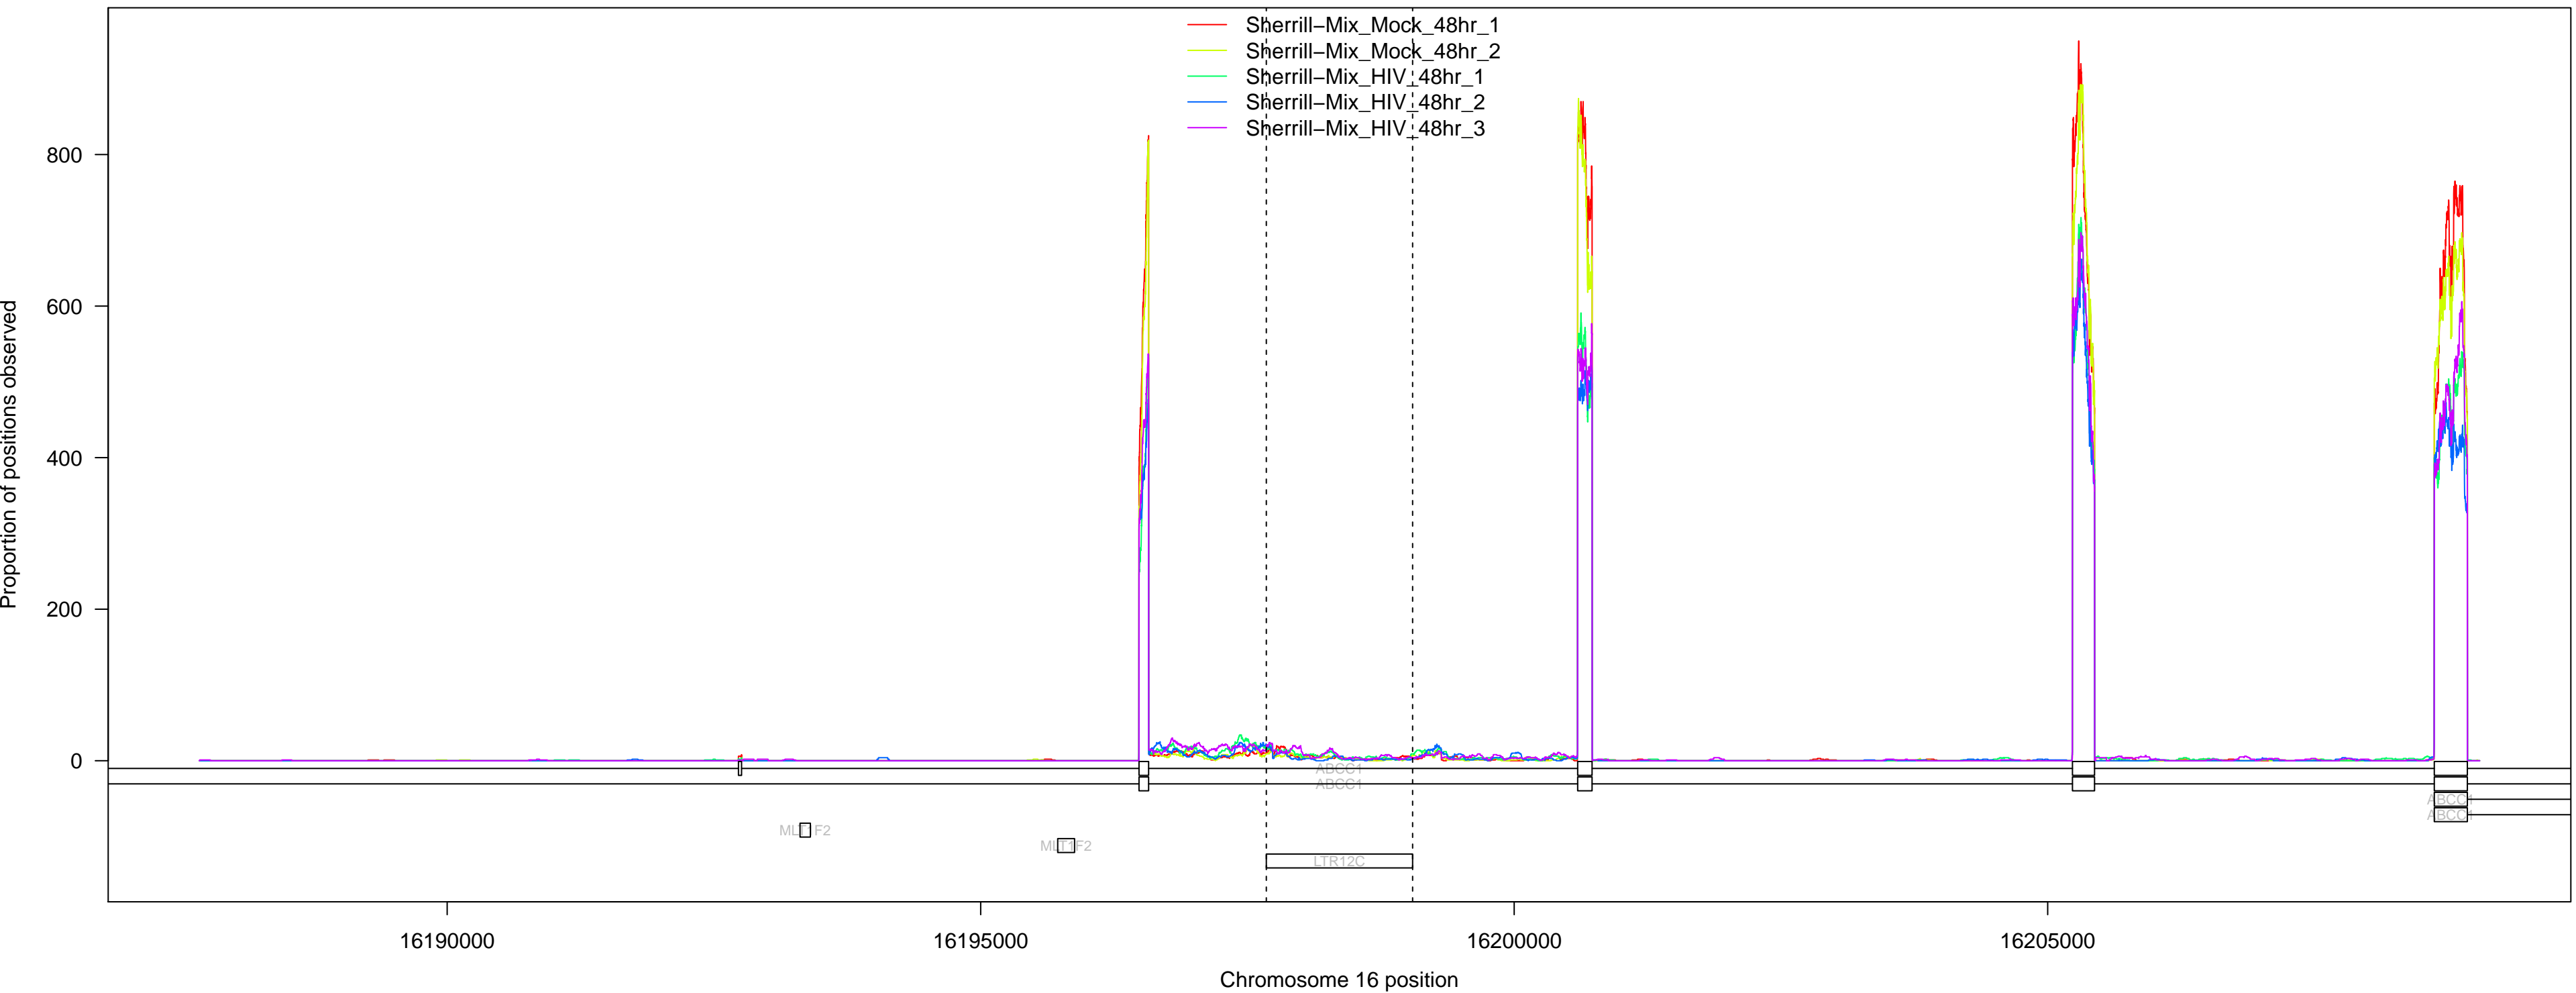

B.12

chr10:31218123-31219525

Proportion of positions observed

30  
25  
20  
15  
10  
5  
0

- Sherrill-Mix\_Mock\_48hr\_1
- Sherrill-Mix\_Mock\_48hr\_2
- Sherrill-Mix\_HIV\_48hr\_1
- Sherrill-Mix\_HIV\_48hr\_2
- Sherrill-Mix\_HIV\_48hr\_3

31210000

31215000

31220000

31225000

31230000

Chromosome 10 position

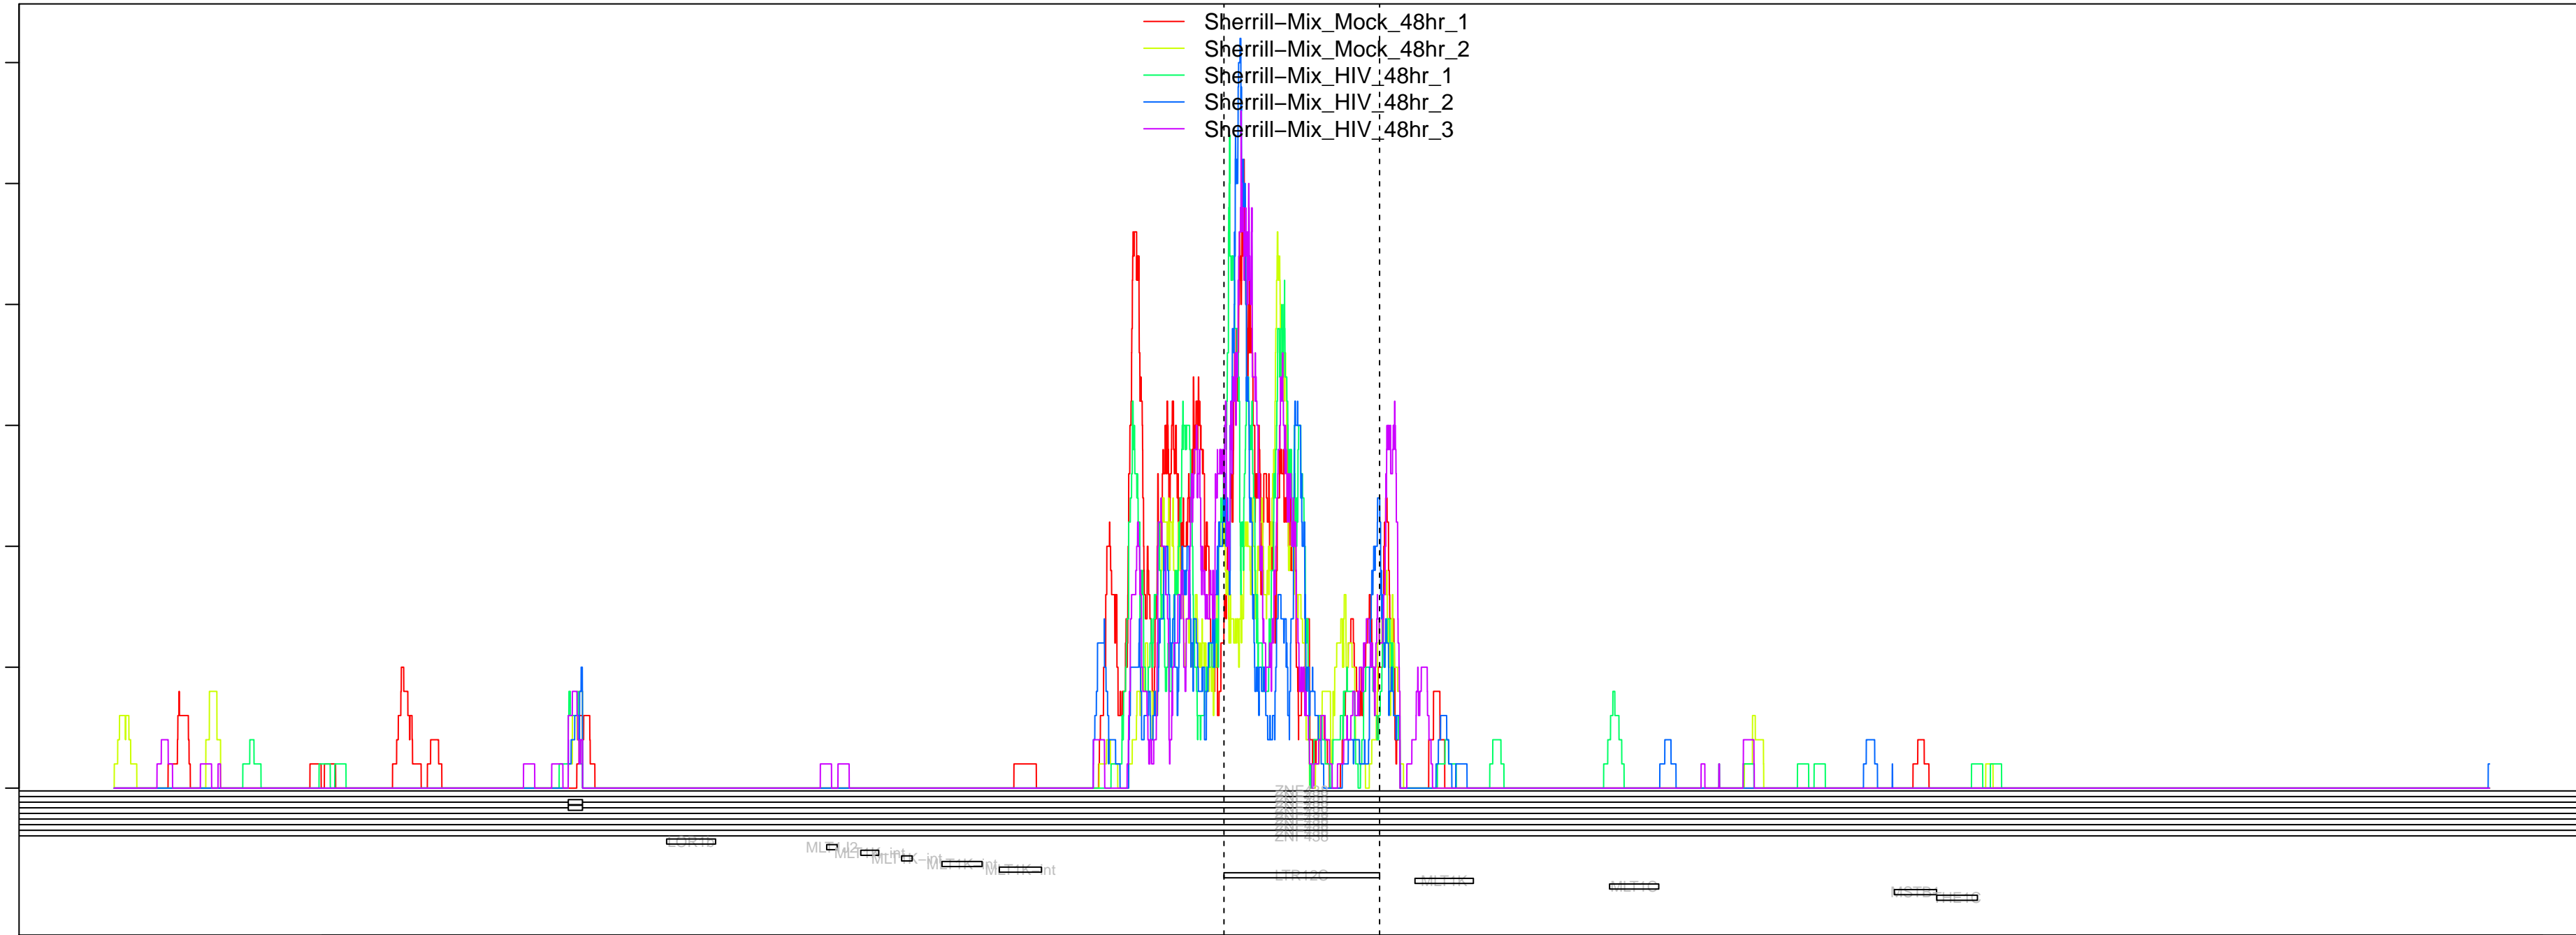

B.13

chr2:114461446-114462547

Proportion of positions observed

150  
100  
50  
0

- Sherrill-Mix\_Mock\_48hr\_1
- Sherrill-Mix\_Mock\_48hr\_2
- Sherrill-Mix\_HIV\_48hr\_1
- Sherrill-Mix\_HIV\_48hr\_2
- Sherrill-Mix\_HIV\_48hr\_3

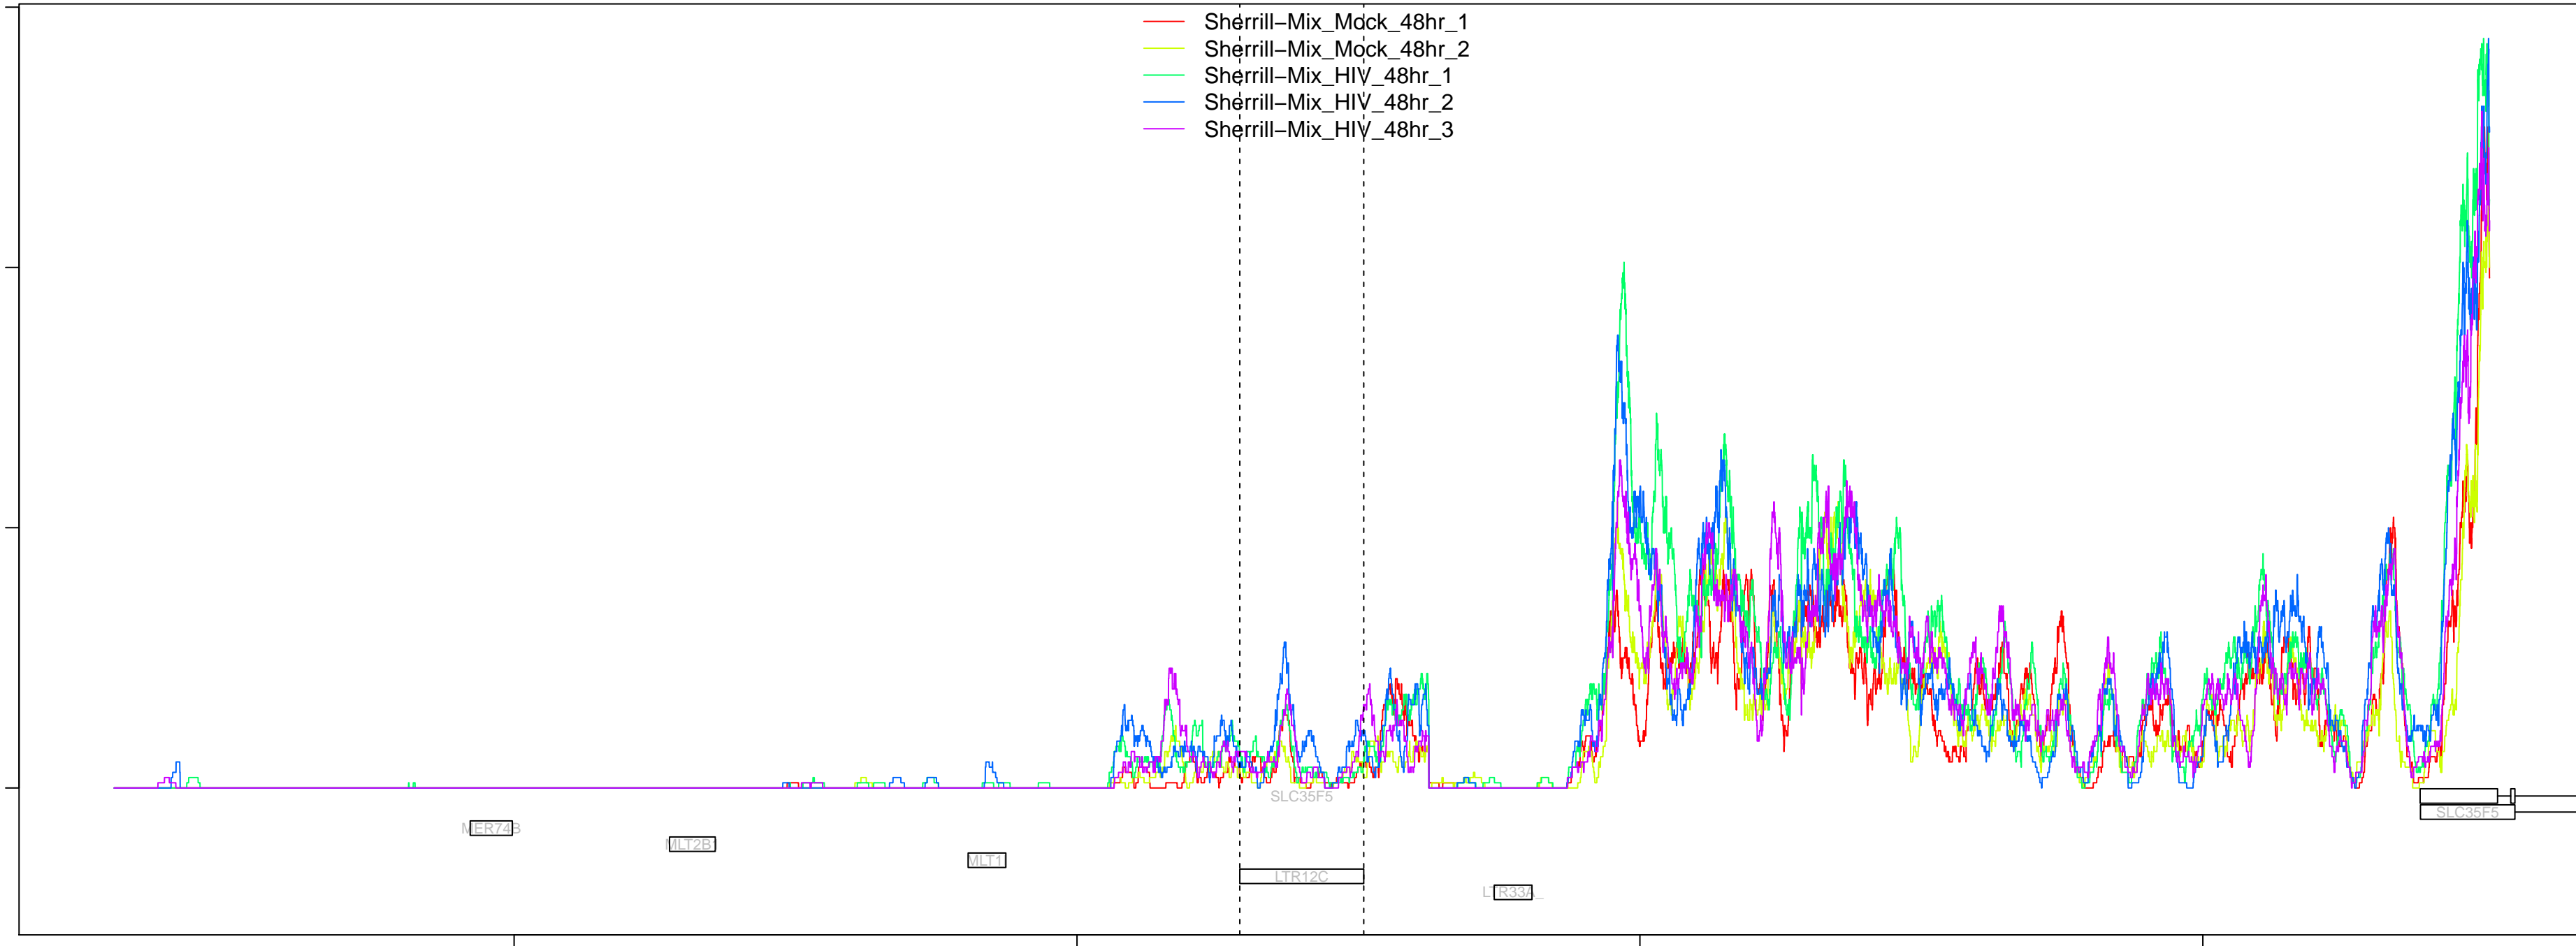

11445000

11446000

114465000

114470000

Chromosome 2 position

MER74B

MLT2B

MLT1

SLC35F5

LTR12C

R33

SLC35F5

B.14

chr6:31163058-31164601

Proportion of positions observed

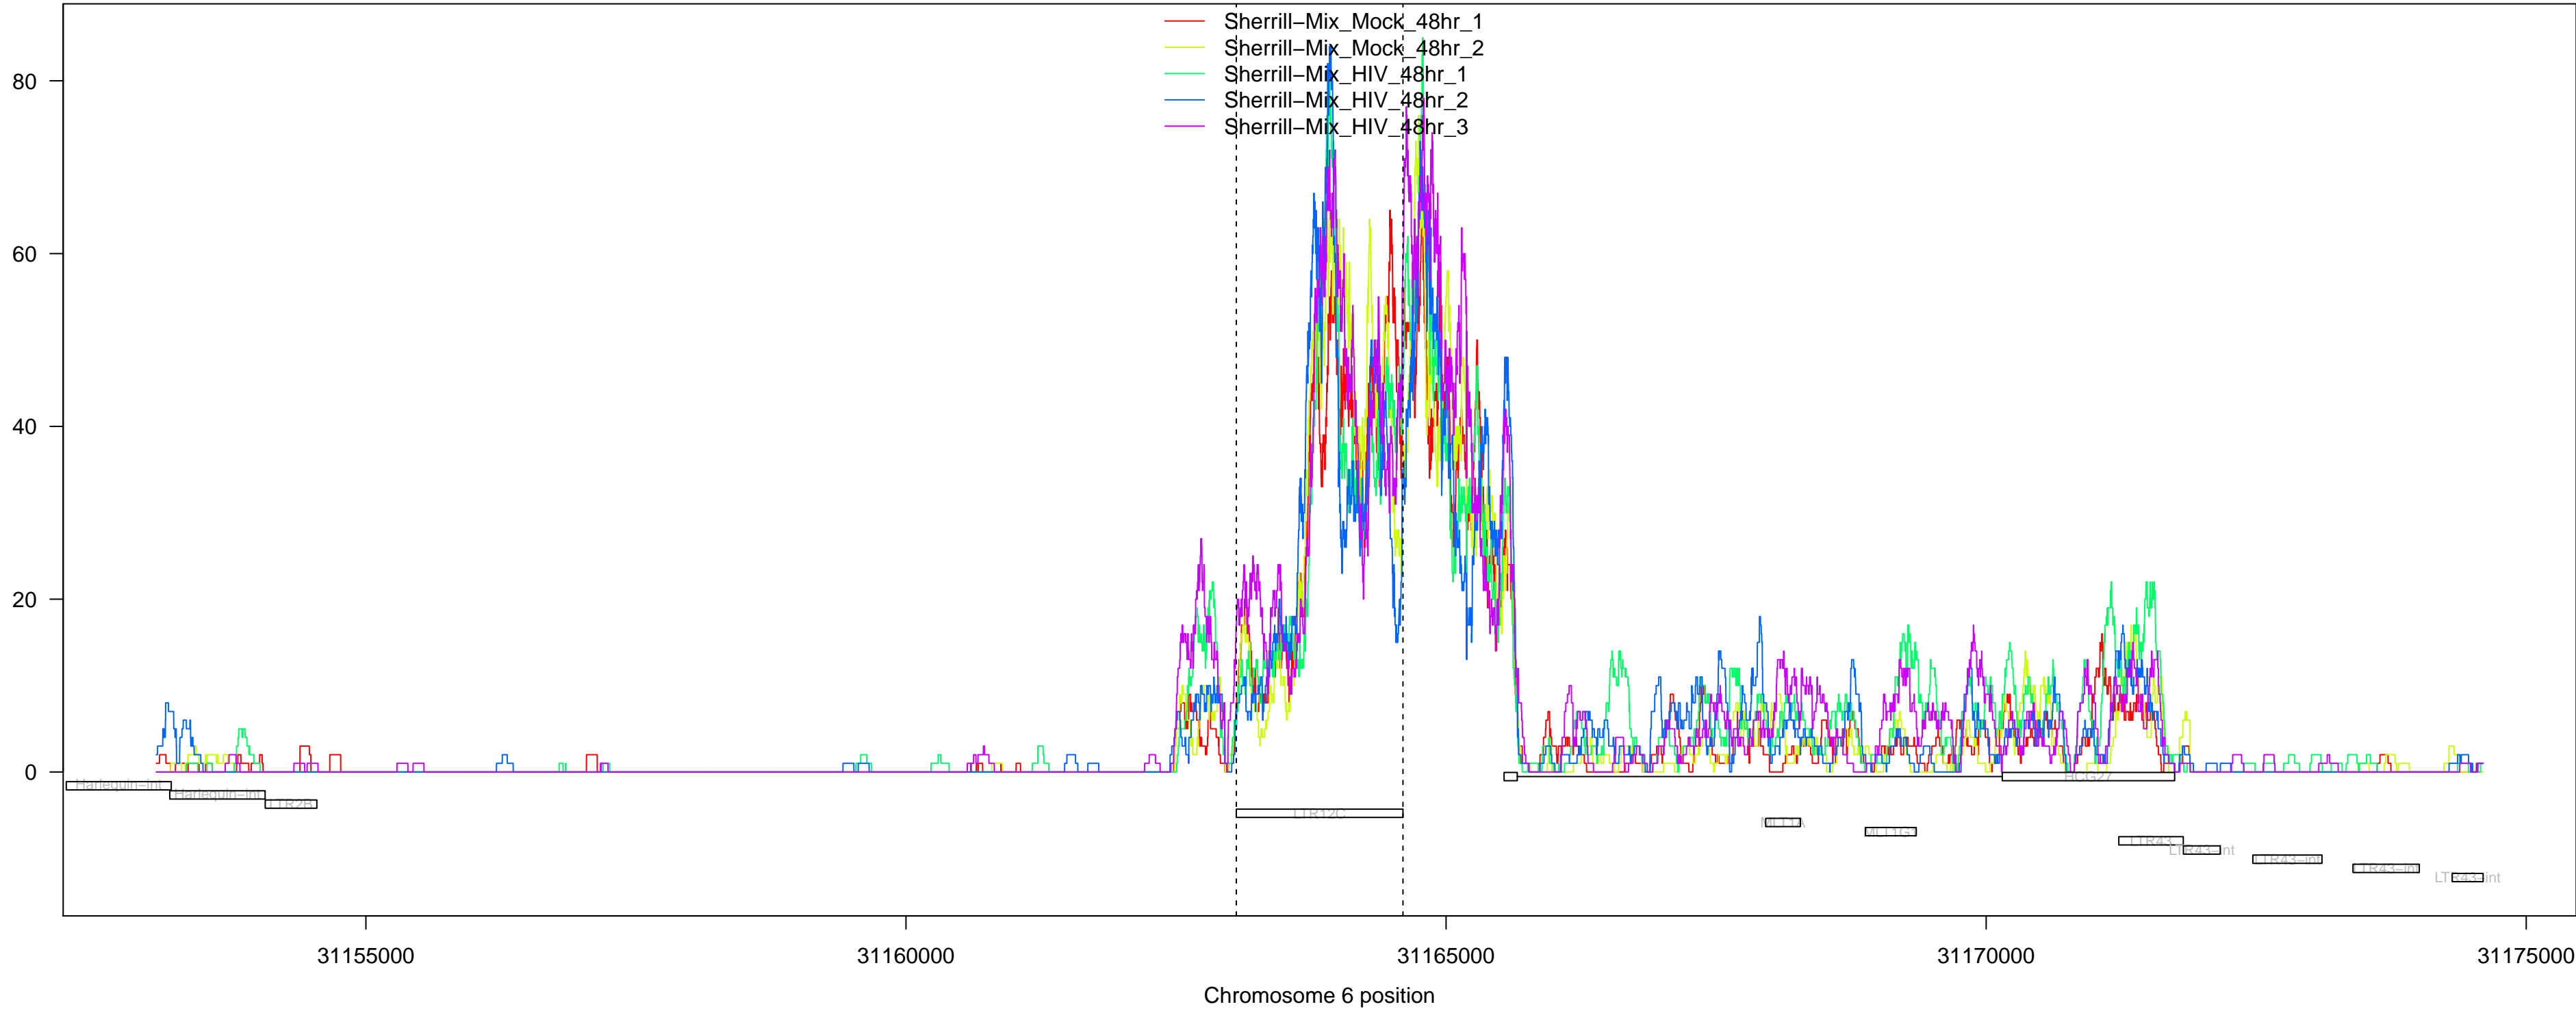

Supplement: 12977_2015_205_MOESM5_ESM.pdf [file 12977_2015_205_MOESM5_ESM.pdf]
