# Supplementary material for: Gene activity in primary T cells infected with HIV89.6: intron retention and induction of genomic repeats
Source: Springer Nature journal article supplement (doi:10.1186/s12977-015-0205-1), 2015-09-17

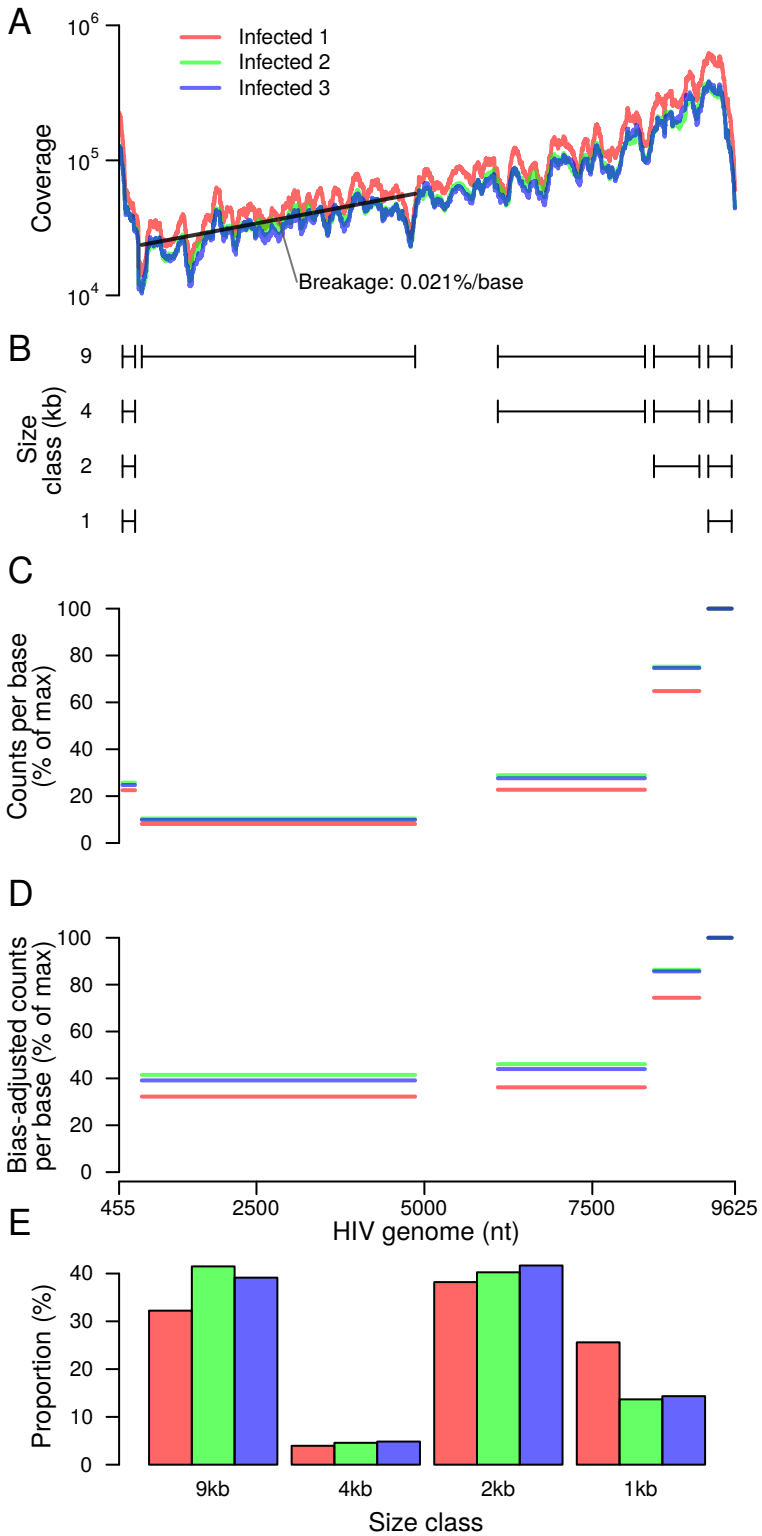

Supplement: 12977_2015_205_MOESM6_ESM.pdf [file 12977_2015_205_MOESM6_ESM.pdf]
